# Supplementary material for: Comprehensive Comparative Analysis and Development of Molecular Markers for Dianthus Species Based on Complete Chloroplast Genome Sequences
Source: Int J Mol Sci. 2022 Oct 19;23(20):12567. doi: 10.3390/ijms232012567 (PMC9604191; doi:10.3390/ijms232012567)
Supplement: Supplementary file 1 [file ijms-23-12567-s001.zip › Supplementary tables S1-S10.xlsx]

## Sheet: TableS1
Table S1 The infornamtion of 12 Dianthus spp. accessions.
No.	Sample	Latin name	Description
1	Dch 'MH'	Dianthus chinensis	inbred lines
2	Dch 'dhs'	Dianthus chinensis	inbred lines
3	Dch 'cf'	Dianthus chinensis	inbred lines
4	Dch 'L'	Dianthus chinensis	inbred lines
5	'HY'	Dianthus x cincinnatus 'HY'	cultivar
6	Dsu 'QM'	Dianthus superbus	inbred lines
7	Dbr 'XB'	Dianthus barbatus	inbred lines
8	Dca 'XSZH'	Dianthus caryophyllus	inbred lines
9	Dch 'X'	Dianthus chinensis	inbred lines
10	'WC'	Dianthus 'Dynasty'	cultivar
11	Dch 'DPD'	Dianthus chinensis	inbred lines
12	F1 '87M'	Dianthus chinensis x Dianthus x cincinnatus 'HY'	Hybrid offspring F1
13	Dca	Dianthus caryophyllus	From NCBI
14	Dgr	Dianthus gratianopolitanus	From NCBI
15	Dch	Dianthus chinensis	From NCBI
16	Dlo	Dianthus longicalyx	From NCBI

## Sheet: Table S2
Table S2 The primers used in this study.
Name of primers	Primer sequences 5′-3′	Sample	Location
X-1-F	ACAAGTGGGGAATGTTGGAGTGA	Dch 'X' leaf	Gap
X-1-R	GGTCGTGTAATCAATACCTGGGCT	Dch 'X' leaf	Gap
X-2-F	CTTCGTTTCTCTCTTTATTTTCGG	Dch 'X' leaf	Gap
X-2-R	TCATTTTTGATTCTTGTTTTTTTTTGT	Dch 'X' leaf	Gap
Maker1-F	TGACTGATAAAGGGATCAAATGGT	all 12 Dianthus species leaves	clpP-psbB
Maker1-R	TCCTCTAAGCTACCAATACCAACA	all 12 Dianthus species leaves	clpP-psbB

## Sheet: Table S3
Table S3 GenBank accession numbers for the Caryophyllales species mentioned in this study.
Series	Species	Accession No.
Chenopodiaceae	Chenopodium album	KY419707
	Chenopodium quinoa	KY419706
	Spinacia oleracea	NC_ 002202
Amaranthaceae	Achyranthes aspera	NC_ 050063
Achatocarpaceae	Achatocarpus nigricans	NC_ 040946
Nepenthaceae	Nepenthes khasiana	NC_ 051455
Polygonaceae	Fagopyrum leptopodum	MW017633
Caryophyllaceae	Gymnocarpos przewalskii	NC_ 036812
	Spergula arvensis	NC_ 041240
	Colobanthus quitensis	NC_ 028080
	Colobanthus apetalus	NC_ 036424
	Pseudostellaria heterophylla	NC_ 044183
	Pseudostellaria setulosa	NC_ 041462
	Pseudostellaria palibiniana	NC_ 041166
	Pseudostellaria okamotoi	NC_ 039974
	Pseudostellaria longipedicellata	NC_ 039454
	Agrostemma githago	NC_ 023357
	Silene paradoxa	NC_ 023360
	Silene chalcedonica	NC_ 023359
	Silene wilfordii	NC_ 035225
	Silene kiusiana	NC_ 048886
	Silene capitata	NC_ 035226
	Silene aprica	NC_ 040934
	Silene latifolia	NC_ 016730
	Silene vulgaris	JF715057
	Silene noctiflora	JF715056
	Silene conoidea	NC_ 023358
	Silene conica	NC_ 016729
	Psammosilene tunicoides	NC_ 045947
	Gypsophila vaccaria	NC_ 040936
	Dianthus caryophyllus	NC_ 039650
	Dianthus gratianopolitanus	LN877389
	Dianthus chinensis	NC_ 053731
	Dianthus longicalyx	NC_ 050834

## Sheet: Tbale S4
Table S4. The length of introns and exons for the splitting genes in Dianthus species.
Specise	Gene	Strand	Start	End	ExonI	IntronI	ExonII	IntronII	ExonIII	IntronIII
Dch 'MH'	rps16	-	4641	5744	40	837	227
	atpF	-	11450	12694	145	690	410
	rpoC1	-	20129	22916	432	736	1620
	ycf3	-	41676	43750	126	756	231	809	153
	ndhB	+	138729	140924	775	663	758
	petB	+	73794	75153	6	712	642
	petD	+	75364	76601	8	755	475
	rpl16	-	79957	81297	9	930	402
	ndhB	-	91618	93813	775	663	758
	ycf1	+	105787	111513	1786	105	3836
	ndhA	+	113259	115399	553	1049	539
	rps12	trans-splicing	68606	94592	114	25874	232	537	26
	rps12	trans-splicing	68606	137845	114	68335	232	537	26
	trnA-UGC	-	131620	132500	38	808	35
	trnI-GAU	-	132571	133560	37	918	35
	trnK-UUU	-	1587	4082	37	2424	35
	trnL-UAA	+	46554	47181	37	541	50
	trnV-UAC	-	50284	50964	39	605	37
	trnI-GAU	+	98982	99971	37	918	35
	trnA-UGC	+	100042	100922	38	808	35
Dch 'dhs'	rps16	-	4734	5844	40	844	227
	atpF	-	11532	12777	145	691	410
	rpoC1	-	20213	23000	432	736	1620
	ycf3	-	41859	43932	126	755	231	809	153
	petB	+	73988	75347	6	712	642
	petD	+	75558	76800	8	760	475
	rpl16	-	80151	81450	9	889	402
	ndhB	-	91769	93964	775	663	758
	ndhA	+	113310	115451	553	1050	539
	ndhB	+	138774	140969	775	663	758
	rps12	trans-splicing	68728	95430	114	25798	232	537	26
	rps12	trans-splicing	68728	137890	114	68258	232	537	26
	trnA-UGC	-	131660	132540	38	808	35
	trnI-GAU	-	132611	133600	37	918	35
	trnK-UUU	-	1686	4175	37	2418	35
	trnL-UAA	+	46765	47391	37	540	50
	trnV-UAC	-	50496	51176	39	605	37
	trnI-GAU	+	99138	100127	37	918	35
	trnA-UGC	+	100198	101078	38	808	35
Dch 'cf'	rps16	-	4652	5762	40	844	227
	atpF	-	11426	12671	145	691	410
	rpoC1	-	20112	22899	432	736	1620
	ycf3	-	41738	43798	126	743	231	808	153
	petB	+	73733	75092	6	712	642
	petD	+	75303	76540	8	755	475
	rpl16	-	79891	81190	9	889	402
	rps19	-	82600	82983	75	105	204
	ndhB	-	91615	93810	775	663	758
	ndhA	-	117132	119272	553	1049	539
	ndhB	+	138630	140825	775	663	758
	rps12	trans-splicing	68559	95381	114	25918	232	537	26
	rps12	trans-splicing	68559	137851	114	68388	232	537	26
	trnK-UUU	-	1588	4077	37	2418	35
	trnL-UAA	+	46489	47116	37	541	50
	trnV-UAC	-	50225	50905	39	605	37
	trnI-GAU	+	98984	99973	37	918	35
	trnA-UGC	+	100044	100924	38	808	35
	trnA-UGC	-	131516	132396	38	808	35
	trnI-GAU	-	132467	133456	37	918	35
Dch 'L'	rps16	-	4652	5762	40	844	227
	atpF	-	11426	12671	145	691	410
	rpoC1	-	20112	22899	432	736	1620
	ycf3	-	41738	43798	126	743	231	808	153
	petB	+	73733	75092	6	712	642
	petD	+	75303	76540	8	755	475
	rpl16	-	79891	81190	9	889	402
	rps19	-	82600	82983	75	105	204
	ndhB	-	91615	93810	775	663	758
	ndhA	+	113168	115308	553	1049	539
	ndhB	+	138630	140825	775	663	758
	rps12	trans-splicing	68728	95430	114	25798	232	537	26
	rps12	trans-splicing	68728	137890	114	68258	232	537	26
	trnK-UUU	-	1588	4077	37	2418	35
	trnL-UAA	+	46489	47116	37	541	50
	trnV-UAC	-	50225	50905	39	605	37
	trnI-GAU	+	98984	99973	37	918	35
	trnA-UGC	+	100044	100924	38	808	35
	trnA-UGC	-	131516	132396	38	808	35
	trnI-GAU	-	132467	133456	37	918	35
'HY'	rps16	-	4648	5751	40	837	227
	atpF	-	11440	12673	145	679	410
	rpoC1	-	20126	22913	432	736	1620
	ycf3	-	41675	43750	126	754	231	812	153
	petB	+	73931	75290	6	712	642
	petD	+	75501	76743	8	760	475
	rpl16	-	80084	81428	9	934	402
	ndhB	-	91747	93942	775	663	758
	ycf1	+	105912	107912	1786	105	110
	ndhA	-	117327	119484	553	1066	539
	ndhB	+	138822	141017	775	663	758
	rps12	trans-splicing	68707	95513	114	25902	232	537	26
	rps12	trans-splicing	68707	138043	114	68432	232	537	26
	trnA-UGC	-	131717	132597	38	808	35
	trnI-GAU	-	132668	133657	37	918	35
	trnK-UUU	-	1602	4089	37	2416	35
	trnL-UAA	+	46618	47247	37	543	50
	trnV-UAC	-	50375	51055	39	605	37
	trnI-GAU	+	99107	100096	37	918	35
	trnA-UGC	+	100167	101047	38	808	35
Dsu 'QM'	rps16	-	4651	5754	40	837	227
	atpF	-	11467	12711	145	690	410
	rpoC1	-	20141	22928	432	736	1620
	ycf3	-	41731	43805	126	755	231	810	153
	petB	+	73895	75260	6	718	642
	petD	+	75472	76719	8	765	475
	rpl16	-	80070	81410	9	930	402
	ndhB	-	91743	93938	775	663	758
	ndhA	-	117257	119397	553	1049	539
	ndhB	+	138743	140938	775	663	758
	rps12	trans-splicing	68721	95509	114	25884	232	537	26
	rps12	trans-splicing	68721	137964	114	68339	232	537	26
	trnA-UGC	-	131629	132509	38	808	35
	trnI-GAU	-	132580	133569	42	913	35
	trnK-UUU	-	1601	4092	37	2420	35
	trnL-UAA	+	46649	47276	37	541	50
	trnV-UAC	-	50380	51065	39	610	37
	trnI-GAU	+	99112	100101	42	913	35
	trnA-UGC	+	100172	101052	38	808	35
Dbr 'XB'	rps16	-	4607	5710	40	837	227
	atpF	-	11403	12635	145	678	410
	rpoC1	-	20088	22875	432	736	1620
	ycf3	-	41613	43698	126	754	231	822	153
	petB	+	73841	75200	6	712	642
	petD	+	75411	76654	8	761	475
	rpl16	-	79995	81339	9	934	402
	ndhB	-	91675	93870	775	663	758
	ndhA	+	113218	115375	553	1066	539
	ndhB	+	138665	140860	775	663	758
	rps12	trans-splicing	68638	94650	114	26692	232	537	26
	rps12	trans-splicing	68638	137886	114	68335	232	537	26
	trnA-UGC	-	131551	132431	38	808	35
	trnI-GAU	-	132502	133491	37	918	35
	trnK-UUU	-	1561	4048	37	2416	35
	trnL-UAA	+	46542	47172	37	544	50
	trnV-UAC	-	50306	50986	39	605	37
	trnI-GAU	+	99044	100033	37	918	35
	trnA-UGC	+	100104	100984	38	808	35
Dca 'XSZH'	rps16	-	4621	5724	40	837	227
	atpF	-	11389	12624	145	681	410
	rpoC1	-	20052	22839	432	736	1620
	ycf3	-	41650	43706	126	754	231	793	153
	petB	+	73831	75190	6	712	642
	petD	+	75401	76640	8	757	475
	rpl16	-	79992	81334	9	932	402
	ndhB	-	91634	93829	775	663	758
	ndhA	-	117122	119262	553	1049	539
	ndhB	+	138595	140790	775	663	758
	rps12	trans-splicing	68625	95452	114	25923	232	537	26
	rps12	trans-splicing	68625	137869	114	68340	232	537	26
	trnA-UGC	-	131481	132361	38	808	35
	trnI-GAU	-	132432	133421	42	913	35
	trnK-UUU	-	1575	4062	37	2416	35
	trnL-UAA	+	46560	47189	37	543	50
	trnV-UAC	-	50299	50978	39	604	37
	trnI-GAU	+	99003	99992	42	913	35
	trnA-UGC	+	100063	100943	38	808	35
Dch 'DPD'	rps16	-	4630	5740	40	844	227
	atpF	-	11428	12673	145	691	410
	rpoC1	-	20109	22896	432	736	1620
	ycf3	-	41755	43828	126	755	231	809	153
	petB	+	73884	75243	6	712	642
	petD	+	75454	76696	8	760	475
	rpl16	-	80047	81346	9	889	402
	ndhB	-	91665	93860	775	663	758
	ndhA	-	117183	119324	553	1050	539
	ndhB	+	138670	140865	775	663	758
	rps12	trans-splicing	68729	9543	114	26590	232	537	26
	rps12	trans-splicing	68729	137891	114	68258	232	537	26
	trnK-UUU	-	1582	4071	37	2418	35
	trnL-UAA	+	46661	47287	37	540	50
	trnV-UAC	-	50392	51072	39	605	37
	trnI-GAU	+	99034	100023	37	918	35
	trnA-UGC	+	100094	100974	38	808	35
	trnA-UGC	-	131556	132436	38	808	35
	trnI-GAU	-	132507	133496	37	918	35
'WC'	rps16	-	4625	5728	40	837	227
	atpF	-	11421	12653	145	678	410
	rpoC1	-	20106	22893	432	736	1620
	ycf3	-	41631	43716	126	754	231	822	153
	petB	+	73859	75218	6	712	642
	petD	+	75429	76672	8	761	475
	rpl16	-	80013	81357	9	934	402
	ndhB	-	91694	93889	775	663	758
	ndhA	+	113236	115393	553	1066	539
	ndhB	+	138683	140878	775	663	758
	rps12	trans-splicing	68655	95459	114	25900	232	537	26
	rps12	trans-splicing	68655	137903	114	68344	232	537	26
	trnK-UUU	-	1579	4066	37	2416	35
	trnL-UAA	+	46560	47190	37	544	50
	trnV-UAC	-	50324	51004	39	605	37
	trnI-GAU	+	99063	100052	37	918	35
	trnA-UGC	+	100123	101003	38	808	35
	trnA-UGC	-	131569	132449	38	808	35
	trnI-GAU	-	132520	133509	37	918	35
Dch 'X'	rps16	-	4630	5740	40	844	227
	atpF	-	11428	12673	145	691	410
	rpoC1	-	20109	22896	432	736	1620
	ycf3	-	41755	43828	126	755	231	809	153
	petB	+	73884	75243	6	712	642
	petD	+	75454	76696	8	760	475
	rpl16	-	80047	81346	9	889	402
	ndhB	-	91665	93860	775	663	758
	ndhA	+	113206	115347	553	1050	539
	ndhB	+	138670	140865	775	663	758
	rps12	trans-splicing	68725	95427	114	25798	232	537	26
	rps12	trans-splicing	68725	137887	114	68258	232	537	26
	trnK-UUU	-	1582	4071	37	2418	35
	trnL-UAA	+	46661	47287	37	540	50
	trnV-UAC	-	50392	51072	39	605	37
	trnI-GAU	+	99034	100023	37	918	35
	trnA-UGC	+	100094	100974	38	808	35
	trnA-UGC	-	131556	132436	38	808	35
	trnI-GAU	-	132507	133496	37	918	35
F1 '87M'	rps16	-	4742	5845	40	837	227
	atpF	-	11551	12795	145	690	410
	rpoC1	-	20230	23017	432	736	1620
	ycf3	-	41272	43346	126	756	231	809	153
	petB	+	73390	74749	6	712	642
	petD	+	74960	76197	8	755	475
	rpl16	-	79553	80893	9	930	402
	ndhB	-	91214	93409	775	663	758
	ndhA	-	116739	118879	553	1049	539
	ndhB	+	138220	140415	775	663	758
	rps12	trans-splicing	68202	94980	114	25874	232	537	26
	rps12	trans-splicing	68202	137441	114	68335	232	537	26
	trnK-UUU	-	1688	4183	37	2424	35
	trnL-UAA	+	46150	46777	37	541	50
	trnV-UAC	-	49880	50560	39	605	37
	trnI-GAU	+	98578	99567	37	918	35
	trnA-UGC	+	99638	100518	38	808	35
	trnA-UGC	-	131111	131991	38	808	35
	trnI-GAU	-	132062	133051	37	918	35

## Sheet: Table S5
Table S5. The localization and type of identified SSRs in Dianthus chloroplast genomes. P1 = Mononucleotide; P2 = Di nucleotide; P3 = Tri nucleotide; P4 = Tetra nucleotide; P5 = Penta nucleotide; 6 = Hexa nucleotide repeats and c = Compound repeat microsatellites.
Specise	SSR nr.	SSR type	SSR	size	start	end	Location	Region
Dch 'MH'_SSR1	1	c	(A)13ttaaattatataaaaaactagcgaataacggagcaatactcctttcttgatagaacaagaaagtttttattgctccgttact(A)20	115	146	260	LCS	intergenic regions
Dch 'MH'_SSR2	2	p1	(T)10	10	3500	3509	LCS	intergenic regions
Dch 'MH'_SSR3	3	p1	(T)11	11	5237	5247	LCS	intron regions
Dch 'MH'_SSR4	4	c	(T)14acttatctatcaataactcaatcaaaatgcaatt(A)11	59	6793	6851	LCS	intergenic regions
Dch 'MH'_SSR5	5	p2	(TA)7	14	7701	7714	LCS	intergenic regions
Dch 'MH'_SSR6	6	p1	(A)16	16	7855	7870	LCS	intergenic regions
Dch 'MH'_SSR7	7	p2	(AT)6	12	11984	11995	LCS	intron regions
Dch 'MH'_SSR8	8	p1	(T)11	11	12125	12135	LCS	intron regions
Dch 'MH'_SSR9	9	p1	(A)10	10	13399	13408	LCS	protein coding regions
Dch 'MH'_SSR10	10	p3	(TTA)4	12	14792	14803	LCS	intergenic regions
Dch 'MH'_SSR11	11	p1	(T)13	13	15738	15750	LCS	intergenic regions
Dch 'MH'_SSR12	12	p1	(T)10	10	15942	15951	LCS	protein coding regions
Dch 'MH'_SSR13	13	p1	(A)16	16	17647	17662	LCS	protein coding regions
Dch 'MH'_SSR14	14	p1	(T)12	12	17825	17836	LCS	protein coding regions
Dch 'MH'_SSR15	15	p1	(A)12	12	26813	26824	LCS	intergenic regions
Dch 'MH'_SSR16	16	p3	(ATT)4	12	28910	28921	LCS	intergenic regions
Dch 'MH'_SSR17	17	p1	(A)11	11	29325	29335	LCS	intergenic regions
Dch 'MH'_SSR18	18	p3	(ATA)6	18	30481	30498	LCS	intergenic regions
Dch 'MH'_SSR19	19	c	(TAT)5aataatttataataataaagttgaactaatcttcattatattaaaatgacta(AAT)4	79	30664	30742	LCS	protein coding regions
Dch 'MH'_SSR20	20	p1	(A)12	12	31435	31446	LCS	intergenic regions
Dch 'MH'_SSR21	21	p1	(C)10	10	39059	39068	LCS	protein coding regions
Dch 'MH'_SSR22	22	p1	(T)12	12	40706	40717	LCS	intergenic regions
Dch 'MH'_SSR23	23	p1	(A)10	10	41432	41441	LCS	intergenic regions
Dch 'MH'_SSR24	24	p1	(T)13	13	41919	41931	LCS	intron regions
Dch 'MH'_SSR25	25	p1	(A)13	13	43603	43615	LCS	intron regions
Dch 'MH'_SSR26	26	p5	(TGTAT)3	15	45413	45427	LCS	intergenic regions
Dch 'MH'_SSR27	27	p1	(A)10	10	45715	45724	LCS	intergenic regions
Dch 'MH'_SSR28	28	p4	(TAAA)4	16	45919	45934	LCS	intergenic regions
Dch 'MH'_SSR29	29	p1	(T)10	10	53240	53249	LCS	intergenic regions
Dch 'MH'_SSR30	30	p1	(A)10	10	62387	62396	LCS	intergenic regions
Dch 'MH'_SSR31	31	p1	(A)10	10	63033	63042	LCS	protein coding regions
Dch 'MH'_SSR32	32	p1	(A)11	11	64250	64260	LCS	intergenic regions
Dch 'MH'_SSR33	33	c	(T)11accacccttactttatagttgatgaatccaaaactttcaattgaactgattcttctttaaatatccattttcactatca(T)10	100	64448	64547	LCS	intergenic regions
Dch 'MH'_SSR34	34	p1	(T)10	10	65693	65702	LCS	intergenic regions
Dch 'MH'_SSR35	35	p1	(A)10	10	66199	66208	LCS	intergenic regions
Dch 'MH'_SSR36	36	p1	(A)10	10	66388	66397	LCS	intergenic regions
Dch 'MH'_SSR37	37	c	(T)10a(T)13ataattataattgat(A)14	53	66720	66772	LCS	intergenic regions
Dch 'MH'_SSR38	38	c*	(A)9(ATAATAATAATAATAGACTTTTTCTTTATTTAATTGATAATAAGAATGGAGTTGAATAAAAAAATAAAAAAAGGAATCTGAACTCAAACACGAATTACCGCTTTATTCTAAAAAAACCCAAGACTCCCGATTTTTTTTCGTATCGTAACATAAAAAAAATCGTAAAAAATCTTTTTGACTCCCGGAGAATAAACTCCGGGTAATTTCATTTAAATCATTTCGGAGCATTTGTTCGAATCTTATTTTTTTATGATATCATTTGAAATCATATAAAGACAATTCCGATTTAATATAGCTATTTGTGCAAGTACTTTACGATTAAGAAGCAACTGTTTCTTGTACAGATCATTTAAAAATTGACTATAATTATAGTATACCCCCCTTTCGCGAATTA…	23	67183	67205	LCS	intergenic regions
			CTCTGGTTCAAGTCCAGGATGGCCCAGCTGCGCCAGGGAAAAGAATAAGAATAGAAGAAGCGTTTGACTCCTTCATGCATGCTCCACTTGGCCCGGGGGGATATAGCTCAGTTGGTAGAGCTCCGCTCTTGCAATTGGGTCGTTGCGATTACGGGTTGGATGTCTAATTGTCCAGGCAGTAATGATAGTATCTTGTACCTGAACCGGTGGCTCACTTTTTCTAAGTAATGGGGAAGAGGACCGAAACATGCCACTGAAAGACTCTACTGAGACAAAACAAAGATGGGCTGTCAAGAACGTAGAGGAGGTAGGATGGGCAGTTGGTCAGATCTAGTATGGATCGTACATGGACAGTAGTTGGAGTCGGCGGCTCTCCTAGGGTTCCCTAATTTTGGATCC…
			AAGAGACCCTCCTGGCCCAACCCTAGACACTCTAAGATCCTTTTTCAAACCTGCTCCCATTTCGAGTCAAGAGATAGATAAATAGACACATCCCATTCCACTGATCGGGGGTCGAAGACCAAGAAGTGAGTTATTTATACCAAGCATTCTTCTTACGGCTAGATCCAATCTCCTGGTCCCTGCGGAAAGGAAAAAGAATGTCACGTTCTTCCTTTCGGGAAGGGAGGATTAGGGAAATCCTATTGATTGCAGCTTTCTCCAGACCTCTGGGAAAGCATGAAAAAAAGGCTCGAATGGTACGATCCTTCCGTCACCCCATTCATTCTGGGTGATCTCGTAGTTCTTGGTCTGTGAAGATGCGTTGTTAGGTGCTCCATTTCCATTGAGGCCGAACCTAAA…
Dch 'MH'_SSR39	39	p1	(T)10	10	69399	69408	LCS	intron regions
Dch 'MH'_SSR40	40	p1	(A)10	10	69521	69530	LCS	intron regions
Dch 'MH'_SSR41	41	p1	(A)14	14	70048	70061	LCS	intron regions
Dch 'MH'_SSR42	42	p3	(TAA)4	12	70913	70924	LCS	intergenic regions
Dch 'MH'_SSR43	43	p1	(T)15	15	72937	72951	LCS	intergenic regions
Dch 'MH'_SSR44	44	p1	(T)14	14	75611	75624	LCS	intron regions
Dch 'MH'_SSR45	45	p1	(A)10	10	75846	75855	LCS	intron regions
Dch 'MH'_SSR46	46	p1	(T)10	10	80683	80692	LCS	intron regions
Dch 'MH'_SSR47	47	c	(A)17gaatgaaaaaggttgtcattttttgttccatt(A)12	61	81374	81434	LCS	intergenic regions
Dch 'MH'_SSR48	48	p1	(T)10	10	104990	104999	IRa	intergenic regions
Dch 'MH'_SSR49	49	p1	(A)10	10	107126	107135	IRa	protein coding regions
Dch 'MH'_SSR50	50	p1	(A)10	10	107255	107264	IRa	protein coding regions
Dch 'MH'_SSR51	51	p1	(T)11	11	108210	108220	SSC	protein coding regions
Dch 'MH'_SSR52	52	p3	(TTA)4	12	108369	108380	SSC	protein coding regions
Dch 'MH'_SSR53	53	p1	(A)15	15	110650	110664	SSC	intergenic regions
Dch 'MH'_SSR54	54	c*	(AAT)4gaaaaagtaaatgtattttctttcatattttcatttgagaatttagagatttc(T)15(TA)7*	93	111521	111613	SSC	intergenic regions
Dch 'MH'_SSR55	55	p1	(A)18	18	111901	111918	SSC	protein coding regions
Dch 'MH'_SSR56	56	p1	(A)10	10	114314	114323	SSC	intergenic regions
Dch 'MH'_SSR57	57	p1	(T)10	10	115547	115556	SSC	intergenic regions
Dch 'MH'_SSR58	58	p1	(T)10	10	116251	116260	SSC	intergenic regions
Dch 'MH'_SSR59	59	p1	(T)10	10	118089	118098	SSC	intron regions
Dch 'MH'_SSR60	60	p1	(T)12	12	122217	122228	SSC	protein coding regions
Dch 'MH'_SSR61	61	p1	(A)11	11	122591	122601	SSC	protein coding regions
Dch 'MH'_SSR62	62	p1	(T)10	10	122844	122853	SSC	protein coding regions
Dch 'MH'_SSR63	63	p1	(T)12	12	123461	123472	SSC	protein coding regions
Dch 'MH'_SSR64	64	p1	(T)13	13	123769	123781	SSC	protein coding regions
Dch 'MH'_SSR65	65	p1	(T)10	10	125173	125182	IRb	protein coding regions
Dch 'MH'_SSR66	66	p1	(T)10	10	125302	125311	IRb	protein coding regions
Dch 'MH'_SSR67	67	p1	(A)10	10	127438	127447	IRb	intergenic regions
Dch 'dhs'_SSR1	1	c	(A)14ttaaattatataaaaaactagcgaataacggagcaatactcctttcttgatagaacaagaaagtttttattgctccgttact(A)13	109	146	254	LCS	intergenic regions
Dch 'dhs'_SSR2	2	p1	(T)10	10	3488	3497	LCS	intron regions
Dch 'dhs'_SSR3	3	p1	(T)11	11	5232	5242	LCS	intron regions
Dch 'dhs'_SSR4	4	c	(T)13acttatctatcaataactcaatcaaaatgcaatt(A)11	58	6786	6843	LCS	intergenic regions
Dch 'dhs'_SSR5	5	p2	(TA)7	14	7693	7706	LCS	intergenic regions
Dch 'dhs'_SSR6	6	p1	(A)16	16	7847	7862	LCS	intergenic regions
Dch 'dhs'_SSR7	7	p2	(AT)6	12	11961	11972	LCS	intron regions
Dch 'dhs'_SSR8	8	p1	(T)11	11	12102	12112	LCS	intron regions
Dch 'dhs'_SSR9	9	p1	(T)10	10	12251	12260	LCS	intron regions
Dch 'dhs'_SSR10	10	p1	(A)10	10	13377	13386	LCS	intergenic regions
Dch 'dhs'_SSR11	11	p3	(TTA)4	12	14770	14781	LCS	intergenic regions
Dch 'dhs'_SSR12	12	p1	(T)14	14	15716	15729	LCS	intergenic regions
Dch 'dhs'_SSR13	13	p1	(T)10	10	15921	15930	LCS	protein coding regions
Dch 'dhs'_SSR14	14	p1	(A)16	16	17626	17641	LCS	protein coding regions
Dch 'dhs'_SSR15	15	p1	(T)12	12	17804	17815	LCS	protein coding regions
Dch 'dhs'_SSR16	16	p1	(A)12	12	26785	26796	LCS	intergenic regions
Dch 'dhs'_SSR17	17	p3	(ATT)4	12	28937	28948	LCS	intergenic regions
Dch 'dhs'_SSR18	18	p1	(A)13	13	29352	29364	LCS	intergenic regions
Dch 'dhs'_SSR19	19	p3	(ATA)4	12	30524	30535	LCS	intergenic regions
Dch 'dhs'_SSR20	20	c	(TAT)5aataatttataataataaagttgaactaatcttcattatattaaaatgacta(AAT)4	79	30712	30790	LCS	intergenic regions
Dch 'dhs'_SSR21	21	p1	(A)12	12	31476	31487	LCS	intergenic regions
Dch 'dhs'_SSR22	22	p1	(C)10	10	39135	39144	LCS	protein coding regions
Dch 'dhs'_SSR23	23	p1	(T)14	14	40782	40795	LCS	intergenic regions
Dch 'dhs'_SSR24	24	p1	(A)10	10	41510	41519	LCS	intergenic regions
Dch 'dhs'_SSR25	25	p1	(T)13	13	41997	42009	LCS	intron regions
Dch 'dhs'_SSR26	26	p1	(A)12	12	43681	43692	LCS	intron regions
Dch 'dhs'_SSR27	27	p5	(TGTAT)3	15	45500	45514	LCS	intergenic regions
Dch 'dhs'_SSR28	28	p1	(A)10	10	45792	45801	LCS	intergenic regions
Dch 'dhs'_SSR29	29	p4	(TAAA)4	16	45986	46001	LCS	intergenic regions
Dch 'dhs'_SSR30	30	p1	(T)10	10	48933	48942	LCS	intergenic regions
Dch 'dhs'_SSR31	31	c	(T)11att(A)11	25	51426	51450	LCS	intergenic regions
Dch 'dhs'_SSR32	32	p1	(T)10	10	53395	53404	LCS	protein coding regions
Dch 'dhs'_SSR33	33	c	(A)10gaagggggattctttgatcatttatacgaaaaaaatgataaaaaaattatgatttattatacttaaattataaatttaatggga(C)10	104	62554	62657	LCS	intergenic regions
Dch 'dhs'_SSR34	34	p1	(A)10	10	63201	63210	LCS	protein coding regions
Dch 'dhs'_SSR35	35	p1	(A)11	11	64418	64428	LCS	intergenic regions
Dch 'dhs'_SSR36	36	c	(T)11accacccttactttatagttgatgaatccaaaactttcaattgaactgattcttctttaaatatccattttcactatca(T)10	100	64616	64715	LCS	intergenic regions
Dch 'dhs'_SSR37	37	p1	(T)10	10	65861	65870	LCS	intergenic regions
Dch 'dhs'_SSR38	38	p1	(A)10	10	66355	66364	LCS	protein coding regions
Dch 'dhs'_SSR39	39	c	(T)10a(T)13ataattgat(A)13	46	66868	66913	LCS	intergenic regions
Dch 'dhs'_SSR40	40	p1	(A)15	15	67324	67338	LCS	intergenic regions
Dch 'dhs'_SSR41	41	p1	(T)10	10	69521	69530	LCS	intron regions
Dch 'dhs'_SSR42	42	p1	(A)10	10	69643	69652	LCS	intron regions
Dch 'dhs'_SSR43	43	p1	(A)14	14	70170	70183	LCS	intron regions
Dch 'dhs'_SSR44	44	p1	(T)14	14	73027	73040	LCS	intergenic regions
Dch 'dhs'_SSR45	45	p1	(T)18	18	75701	75718	LCS	intron regions
Dch 'dhs'_SSR46	46	p1	(A)10	10	75940	75949	LCS	protein coding regions
Dch 'dhs'_SSR47	47	c	(A)16gaatgaaaaaggttgtcattttttgttccatt(A)11	59	81422	81480	LCS	intergenic regions
Dch 'dhs'_SSR48	48	p5	(TGTTG)3	15	95914	95928	IRa	intergenic regions
Dch 'dhs'_SSR49	49	p1	(T)10	10	105041	105050	IRa	intergenic regions
Dch 'dhs'_SSR50	50	p1	(A)10	10	107177	107186	IRa	protein coding regions
Dch 'dhs'_SSR51	51	p1	(A)10	10	107306	107315	IRa	protein coding regions
Dch 'dhs'_SSR52	52	p1	(T)11	11	108261	108271	SSC	protein coding regions
Dch 'dhs'_SSR53	53	p3	(TTA)4	12	108420	108431	SSC	protein coding regions
Dch 'dhs'_SSR54	54	p1	(A)15	15	110695	110709	SSC	intergenic regions
Dch 'dhs'_SSR55	55	c	(AAT)4gaaaaagtaaatgtattttctttcatattttcatttgagaatttagagatttc(T)14(AT)6	91	111538	111628	SSC	protein coding regions
Dch 'dhs'_SSR56	56	p1	(A)16	16	111917	111932	SSC	protein coding regions
Dch 'dhs'_SSR57	57	p1	(A)10	10	114329	114338	SSC	intergenic regions
Dch 'dhs'_SSR58	58	p1	(T)10	10	115586	115595	SSC	intergenic regions
Dch 'dhs'_SSR59	59	p1	(T)10	10	116290	116299	SSC	intergenic regions
Dch 'dhs'_SSR60	60	p1	(T)11	11	118128	118138	SSC	intron regions
Dch 'dhs'_SSR61	61	p1	(T)12	12	122257	122268	SSC	protein coding regions
Dch 'dhs'_SSR62	62	p1	(A)11	11	122631	122641	SSC	protein coding regions
Dch 'dhs'_SSR63	63	p1	(T)10	10	122884	122893	SSC	protein coding regions
Dch 'dhs'_SSR64	64	p1	(T)12	12	123501	123512	SSC	protein coding regions
Dch 'dhs'_SSR65	65	p1	(T)15	15	123807	123821	SSC	protein coding regions
Dch 'dhs'_SSR66	66	p1	(T)10	10	125213	125222	IRb	protein coding regions
Dch 'dhs'_SSR67	67	p1	(T)10	10	125342	125351	IRb	protein coding regions
Dch 'dhs'_SSR68	68	p1	(A)10	10	127478	127487	IRb	intergenic regions
Dch 'dhs'_SSR69	69	p5	(CAACA)3	15	136600	136614	IRb	intergenic regions
Dch 'cf'_SSR1	1	c	(A)13ttaaattatataaaaaactagcgaataacggagcaatactcctttcttgatagaacaagaaagtttttattgctccgttact(A)21	116	146	261	LSC	intergenic regions
Dch 'cf'_SSR2	2	p1	(T)10	10	3495	3504	LSC	intron regions
Dch 'cf'_SSR3	3	p1	(T)11	11	5255	5265	LSC	intron regions
Dch 'cf'_SSR4	4	c	(T)14acttatctatcaataactcaatcaaaatgcaatt(A)11	59	6806	6864	LSC	intergenic regions
Dch 'cf'_SSR5	5	p2	(TA)7	14	7714	7727	LSC	intergenic regions
Dch 'cf'_SSR6	6	p1	(A)18	18	7868	7885	LSC	intergenic regions
Dch 'cf'_SSR7	7	p2	(AT)6	12	11960	11971	LSC	intron regions
Dch 'cf'_SSR8	8	p1	(T)11	11	12101	12111	LSC	intron regions
Dch 'cf'_SSR9	9	p1	(T)10	10	12250	12259	LSC	intron regions
Dch 'cf'_SSR10	10	p1	(A)10	10	13376	13385	LSC	intergenic regions
Dch 'cf'_SSR11	11	p3	(TTA)4	12	14769	14780	LSC	intergenic regions
Dch 'cf'_SSR12	12	p1	(T)13	13	15715	15727	LSC	intergenic regions
Dch 'cf'_SSR13	13	p1	(T)10	10	15919	15928	LSC	protein coding regions
Dch 'cf'_SSR14	14	p1	(A)16	16	17624	17639	LSC	protein coding regions
Dch 'cf'_SSR15	15	p1	(T)12	12	17802	17813	LSC	protein coding regions
Dch 'cf'_SSR16	16	p1	(A)12	12	26789	26800	LSC	intergenic regions
Dch 'cf'_SSR17	17	p3	(ATT)4	12	28924	28935	LSC	intergenic regions
Dch 'cf'_SSR18	18	p1	(A)12	12	29339	29350	LSC	intergenic regions
Dch 'cf'_SSR19	19	p6	(AATATA)3	18	29962	29979	LSC	intergenic regions
Dch 'cf'_SSR20	20	p3	(ATA)4	12	30527	30538	LSC	intergenic regions
Dch 'cf'_SSR21	21	p3	(AAT)4	12	30782	30793	LSC	intergenic regions
Dch 'cf'_SSR22	22	p1	(A)12	12	31486	31497	LSC	intergenic regions
Dch 'cf'_SSR23	23	p1	(C)10	10	39119	39128	LSC	protein coding regions
Dch 'cf'_SSR24	24	p1	(T)14	14	40766	40779	LSC	intergenic regions
Dch 'cf'_SSR25	25	p1	(A)10	10	41494	41503	LSC	intergenic regions
Dch 'cf'_SSR26	26	p1	(T)12	12	41981	41992	LSC	intron regions
Dch 'cf'_SSR27	27	p1	(A)11	11	43653	43663	LSC	intron regions
Dch 'cf'_SSR28	28	p1	(A)10	10	45611	45620	LSC	intergenic regions
Dch 'cf'_SSR29	29	p4	(TAAA)4	16	45815	45830	LSC	intergenic regions
Dch 'cf'_SSR30	30	p1	(T)10	10	47971	47980	LSC	intergenic regions
Dch 'cf'_SSR31	31	p1	(T)10	10	48768	48777	LSC	intergenic regions
Dch 'cf'_SSR32	32	c	(T)12att(A)11	26	51260	51285	LSC	intergenic regions
Dch 'cf'_SSR33	33	p1	(T)10	10	53230	53239	LSC	protein coding regions
Dch 'cf'_SSR34	34	p1	(A)10	10	62387	62396	LSC	intergenic regions
Dch 'cf'_SSR35	35	p1	(A)10	10	63033	63042	LSC	protein coding regions
Dch 'cf'_SSR36	36	p1	(A)11	11	64250	64260	LSC	intergenic regions
Dch 'cf'_SSR37	37	c	(T)11accacccttactttatagttgatgaatccaaaactttcaattgaactgattcttctttaaatatccattttcactatca(T)10	100	64448	64547	LSC	intergenic regions
Dch 'cf'_SSR38	38	p1	(T)10	10	65693	65702	LSC	intergenic regions
Dch 'cf'_SSR39	39	p1	(A)10	10	66187	66196	LSC	intergenic regions
Dch 'cf'_SSR40	40	c	(T)10a(T)13ataattgat(A)13	46	66699	66744	LSC	intergenic regions
Dch 'cf'_SSR41	41	p1	(A)15	15	67155	67169	LSC	intergenic regions
Dch 'cf'_SSR42	42	p1	(T)10	10	69352	69361	LSC	intron regions
Dch 'cf'_SSR43	43	p1	(A)10	10	69474	69483	LSC	intron regions
Dch 'cf'_SSR44	44	p1	(A)14	14	70001	70014	LSC	intron regions
Dch 'cf'_SSR45	45	p1	(T)14	14	72877	72890	LSC	intergenic regions
Dch 'cf'_SSR46	46	p1	(T)15	15	75551	75565	LSC	intron regions
Dch 'cf'_SSR47	47	p1	(A)10	10	75785	75794	LSC	intron regions
Dch 'cf'_SSR48	48	c	(A)17gaatgaaaaaggttgtcattttttgttccatt(A)11	60	81267	81326	LSC	intergenic regions
Dch 'cf'_SSR49	49	p5	(TGTTG)3	15	95865	95879	IRa	intergenic regions
Dch 'cf'_SSR50	50	p1	(T)10	10	104992	105001	IRa	intergenic regions
Dch 'cf'_SSR51	51	p1	(A)10	10	107128	107137	IRa	protein coding regions
Dch 'cf'_SSR52	52	p1	(A)10	10	107257	107266	IRa	protein coding regions
Dch 'cf'_SSR53	53	p1	(T)11	11	108212	108222	SSC	protein coding regions
Dch 'cf'_SSR54	54	p3	(TTA)4	12	108371	108382	SSC	protein coding regions
Dch 'cf'_SSR55	55	p1	(A)14	14	110646	110659	SSC	intergenic regions
Dch 'cf'_SSR56	56	c	(AAT)4gaaaaagtaaatgtattttctttcatattttcatttgataatttagagatttc(T)14(AT)6	91	111488	111578	SSC	protein coding regions
Dch 'cf'_SSR57	57	p1	(A)16	16	111867	111882	SSC	protein coding regions
Dch 'cf'_SSR58	58	p1	(A)10	10	114279	114288	SSC	intergenic regions
Dch 'cf'_SSR59	59	p1	(T)10	10	115536	115545	SSC	intergenic regions
Dch 'cf'_SSR60	60	p1	(T)10	10	116240	116249	SSC	intergenic regions
Dch 'cf'_SSR61	61	p1	(T)10	10	118078	118087	SSC	intron regions
Dch 'cf'_SSR62	62	p1	(T)12	12	122206	122217	SSC	protein coding regions
Dch 'cf'_SSR63	63	p1	(A)11	11	122586	122596	SSC	protein coding regions
Dch 'cf'_SSR64	64	p1	(T)10	10	122839	122848	SSC	protein coding regions
Dch 'cf'_SSR65	65	p1	(T)12	12	123456	123467	SSC	protein coding regions
Dch 'cf'_SSR66	66	p1	(T)10	10	125174	125183	IRb	protein coding regions
Dch 'cf'_SSR67	67	p1	(T)10	10	125303	125312	IRb	protein coding regions
Dch 'cf'_SSR68	68	p1	(A)10	10	127439	127448	IRb	intergenic regions
Dch 'cf'_SSR69	69	p5	(CAACA)3	15	136561	136575	IRb	intergenic regions
Dch 'L'_SSR1	1	c	(A)14ttaaattatataaaaaactagcgaataacggagcaatactcctttcttgatagaacaagaaagtttttattgctccgttact(A)13	109	146	254	LSC	intergenic regions
Dch 'L'_SSR2	2	p1	(T)10	10	3488	3497	LSC	intergenic regions
Dch 'L'_SSR3	3	p1	(T)11	11	5232	5242	LSC	intron regions
Dch 'L'_SSR4	4	c	(T)13acttatctatcaataactcaatcaaaatgcaatt(A)11	58	6786	6843	LSC	intergenic regions
Dch 'L'_SSR5	5	p2	(TA)7	14	7693	7706	LSC	intergenic regions
Dch 'L'_SSR6	6	p1	(A)16	16	7847	7862	LSC	intergenic regions
Dch 'L'_SSR7	7	p2	(AT)6	12	11961	11972	LSC	intron regions
Dch 'L'_SSR8	8	p1	(T)11	11	12102	12112	LSC	intron regions
Dch 'L'_SSR9	9	p1	(T)10	10	12251	12260	LSC	intron regions
Dch 'L'_SSR10	10	p1	(A)10	10	13377	13386	LSC	intergenic regions
Dch 'L'_SSR11	11	p3	(TTA)4	12	14770	14781	LSC	intergenic regions
Dch 'L'_SSR12	12	p1	(T)14	14	15716	15729	LSC	intergenic regions
Dch 'L'_SSR13	13	p1	(T)10	10	15921	15930	LSC	protein coding regions
Dch 'L'_SSR14	14	p1	(A)16	16	17626	17641	LSC	protein coding regions
Dch 'L'_SSR15	15	p1	(T)12	12	17804	17815	LSC	protein coding regions
Dch 'L'_SSR16	16	p1	(A)12	12	26785	26796	LSC	intergenic regions
Dch 'L'_SSR17	17	p3	(ATT)4	12	28937	28948	LSC	intergenic regions
Dch 'L'_SSR18	18	p1	(A)13	13	29352	29364	LSC	intergenic regions
Dch 'L'_SSR19	19	p3	(ATA)4	12	30524	30535	LSC	intergenic regions
Dch 'L'_SSR20	20	c	(TAT)5aataatttataataataaagttgaactaatcttcattatattaaaatgacta(AAT)4	79	30712	30790	LSC	intergenic regions
Dch 'L'_SSR21	21	p1	(A)12	12	31476	31487	LSC	intergenic regions
Dch 'L'_SSR22	22	p1	(C)10	10	39135	39144	LSC	protein coding regions
Dch 'L'_SSR23	23	p1	(T)14	14	40782	40795	LSC	intergenic regions
Dch 'L'_SSR24	24	p1	(A)10	10	41510	41519	LSC	intergenic regions
Dch 'L'_SSR25	25	p1	(T)13	13	41997	42009	LSC	intron regions
Dch 'L'_SSR26	26	p1	(A)12	12	43681	43692	LSC	intron regions
Dch 'L'_SSR27	27	p5	(TGTAT)3	15	45500	45514	LSC	intergenic regions
Dch 'L'_SSR28	28	p1	(A)10	10	45792	45801	LSC	intergenic regions
Dch 'L'_SSR29	29	p4	(TAAA)4	16	45986	46001	LSC	intergenic regions
Dch 'L'_SSR30	30	p1	(T)10	10	48933	48942	LSC	intergenic regions
Dch 'L'_SSR31	31	c	(T)11att(A)11	25	51426	51450	LSC	intergenic regions
Dch 'L'_SSR32	32	p1	(T)10	10	53395	53404	LSC	protein coding regions
Dch 'L'_SSR33	33	c	(A)10gaagggggattctttgatcatttatacgaaaaaaatgataaaaaaattatgatttattatacttaaattataaatttaatggga(C)10	104	62554	62657	LSC	intergenic regions
Dch 'L'_SSR34	34	p1	(A)10	10	63201	63210	LSC	protein coding regions
Dch 'L'_SSR35	35	p1	(A)11	11	64418	64428	LSC	intergenic regions
Dch 'L'_SSR36	36	c	(T)11accacccttactttatagttgatgaatccaaaactttcaattgaactgattcttctttaaatatccattttcactatca(T)10	100	64616	64715	LSC	intergenic regions
Dch 'L'_SSR37	37	p1	(T)10	10	65861	65870	LSC	intergenic regions
Dch 'L'_SSR38	38	p1	(A)10	10	66355	66364	LSC	intergenic regions
Dch 'L'_SSR39	39	c	(T)10a(T)13ataattgat(A)13	46	66868	66913	LSC	intergenic regions
Dch 'L'_SSR40	40	p1	(A)15	15	67324	67338	LSC	intergenic regions
Dch 'L'_SSR41	41	p1	(T)10	10	69521	69530	LSC	intron regions
Dch 'L'_SSR42	42	p1	(A)10	10	69643	69652	LSC	intron regions
Dch 'L'_SSR43	43	p1	(A)14	14	70170	70183	LSC	intron regions
Dch 'L'_SSR44	44	p1	(T)14	14	73027	73040	LSC	intergenic regions
Dch 'L'_SSR45	45	p1	(T)18	18	75701	75718	LSC	intron regions
Dch 'L'_SSR46	46	p1	(A)10	10	75940	75949	LSC	intron regions
Dch 'L'_SSR47	47	c	(A)16gaatgaaaaaggttgtcattttttgttccatt(A)11	59	81422	81480	LSC	intergenic regions
Dch 'L'_SSR48	48	p5	(TGTTG)3	15	95914	95928	IRa	intergenic regions
Dch 'L'_SSR49	49	p1	(T)10	10	105041	105050	IRa	intergenic regions
Dch 'L'_SSR50	50	p1	(A)10	10	107177	107186	IRa	protein coding regions
Dch 'L'_SSR51	51	p1	(A)10	10	107306	107315	IRa	protein coding regions
Dch 'L'_SSR52	52	p1	(T)11	11	108261	108271	SSC	protein coding regions
Dch 'L'_SSR53	53	p3	(TTA)4	12	108420	108431	SSC	protein coding regions
Dch 'L'_SSR54	54	p1	(A)15	15	110695	110709	SSC	intergenic regions
Dch 'L'_SSR55	55	c	(AAT)4gaaaaagtaaatgtattttctttcatattttcatttgagaatttagagatttc(T)14(AT)6	91	111538	111628	SSC	protein coding regions
Dch 'L'_SSR56	56	p1	(A)16	16	111917	111932	SSC	protein coding regions
Dch 'L'_SSR57	57	p1	(A)10	10	114329	114338	SSC	intergenic regions
Dch 'L'_SSR58	58	p1	(T)10	10	115586	115595	SSC	intergenic regions
Dch 'L'_SSR59	59	p1	(T)10	10	116290	116299	SSC	intergenic regions
Dch 'L'_SSR60	60	p1	(T)11	11	118128	118138	SSC	intron regions
Dch 'L'_SSR61	61	p1	(T)12	12	122257	122268	SSC	protein coding regions
Dch 'L'_SSR62	62	p1	(A)11	11	122631	122641	SSC	protein coding regions
Dch 'L'_SSR63	63	p1	(T)10	10	122884	122893	SSC	protein coding regions
Dch 'L'_SSR64	64	p1	(T)12	12	123501	123512	SSC	protein coding regions
Dch 'L'_SSR65	65	p1	(T)15	15	123807	123821	SSC	protein coding regions
Dch 'L'_SSR66	66	p1	(T)10	10	125213	125222	IRb	protein coding regions
Dch 'L'_SSR67	67	p1	(T)10	10	125342	125351	IRb	protein coding regions
Dch 'L'_SSR68	68	p1	(A)10	10	127478	127487	IRb	intergenic regions
Dch 'L'_SSR69	69	p5	(CAACA)3	15	136600	136614	IRb	intergenic regions
'HY'_SSR1	1	p1	(A)17	17	259	275	LSC	intergenic regions
'HY'_SSR2	2	p1	(A)13	13	4447	4459	LSC	intergenic regions
'HY'_SSR3	3	p1	(T)10	10	5244	5253	LSC	intron regions
'HY'_SSR4	4	c	(T)14acttatctatcaataactcaatcaaaatgcaatt(A)11	59	6812	6870	LSC	intergenic regions
'HY'_SSR5	5	p2	(AT)6	12	11974	11985	LSC	intron regions
'HY'_SSR6	6	p1	(A)11	11	13378	13388	LSC	intergenic regions
'HY'_SSR7	7	p3	(TTA)4	12	14789	14800	LSC	intergenic regions
'HY'_SSR8	8	p1	(T)14	14	15735	15748	LSC	intergenic regions
'HY'_SSR9	9	p1	(T)10	10	15939	15948	LSC	protein coding regions
'HY'_SSR10	10	p1	(A)15	15	17645	17659	LSC	protein coding regions
'HY'_SSR11	11	p1	(T)12	12	17822	17833	LSC	protein coding regions
'HY'_SSR12	12	p1	(A)15	15	26804	26818	LSC	intergenic regions
'HY'_SSR13	13	p3	(ATT)4	12	28928	28939	LSC	intergenic regions
'HY'_SSR14	14	p1	(A)14	14	29349	29362	LSC	intergenic regions
'HY'_SSR15	15	p3	(ATA)4	12	30486	30497	LSC	intergenic regions
'HY'_SSR16	16	c	(TAT)5aataatttataataataaagttgaactaatcttcattatattaaaatgacta(AAT)4	79	30663	30741	LSC	intergenic regions
'HY'_SSR17	17	c	(A)11gaattaaatttagtttaacctaagttaatttatgaaccactaaagga(T)10	68	31428	31495	LSC	intergenic regions
'HY'_SSR18	18	p1	(A)12	12	35069	35080	LSC	intergenic regions
'HY'_SSR19	19	p1	(C)10	10	39055	39064	LSC	protein coding regions
'HY'_SSR20	20	p1	(T)14	14	40702	40715	LSC	intergenic regions
'HY'_SSR21	21	p1	(A)15	15	41426	41440	LSC	intergenic regions
'HY'_SSR22	22	p1	(T)10	10	41918	41927	LSC	intron regions
'HY'_SSR23	23	p5	(TGTAT)3	15	45440	45454	LSC	intergenic regions
'HY'_SSR24	24	p1	(A)10	10	45715	45724	LSC	intergenic regions
'HY'_SSR25	25	p1	(T)10	10	46932	46941	LSC	protein coding regions
'HY'_SSR26	26	p1	(T)10	10	48900	48909	LSC	intergenic regions
'HY'_SSR27	27	p6	(ATTCAT)5	30	50329	50358	LSC	intergenic regions
'HY'_SSR28	28	c	(T)10att(A)10	23	51410	51432	LSC	intergenic regions
'HY'_SSR29	29	p1	(T)10	10	53377	53386	LSC	protein coding regions
'HY'_SSR30	30	p1	(T)10	10	59317	59326	LSC	intergenic regions
'HY'_SSR31	31	p1	(A)14	14	62537	62550	LSC	intergenic regions
'HY'_SSR32	32	p1	(A)10	10	63187	63196	LSC	protein coding regions
'HY'_SSR33	33	p1	(A)11	11	64404	64414	LSC	intergenic regions
'HY'_SSR34	34	c	(T)11accacccttactttatagttgatgaatccaaaactttcaattgaactgattcttctttaaatatccattttcactatca(T)10	100	64602	64701	LSC	intergenic regions
'HY'_SSR35	35	p1	(T)10	10	65846	65855	LSC	intergenic regions
'HY'_SSR36	36	c	(T)10a(T)16ataattgat(A)13	49	66847	66895	LSC	intergenic regions
'HY'_SSR37	37	p1	(A)12	12	67306	67317	LSC	intergenic regions
'HY'_SSR38	38	p1	(T)10	10	69525	69534	LSC	intron regions
'HY'_SSR39	39	p1	(A)10	10	69647	69656	LSC	intron regions
'HY'_SSR40	40	p1	(A)10	10	70174	70183	LSC	intron regions
'HY'_SSR41	41	p1	(T)15	15	70517	70531	LSC	intron regions
'HY'_SSR42	42	p1	(T)19	19	75749	75767	LSC	intron regions
'HY'_SSR43	43	p1	(T)13	13	80810	80822	LSC	intron regions
'HY'_SSR44	44	c	(A)17gaatgaaaaaggttgtcattttttgttccatt(A)10	59	81505	81563	LSC	intergenic regions
'HY'_SSR45	45	p5	(TGTTG)3	15	95988	96002	IRa	intergenic regions
'HY'_SSR46	46	p1	(T)10	10	105115	105124	IRa	intergenic regions
'HY'_SSR47	47	p1	(A)10	10	107251	107260	IRa	protein coding regions
'HY'_SSR48	48	p1	(A)10	10	107380	107389	IRa	protein coding regions
'HY'_SSR49	49	p1	(T)11	11	108440	108450	SSC	protein coding regions
'HY'_SSR50	50	p3	(TTA)4	12	108599	108610	SSC	protein coding regions
'HY'_SSR51	51	p1	(A)15	15	110874	110888	SSC	intergenic regions
'HY'_SSR52	52	c*	(AAT)4gaaaaagtaaatgtattttctttcatattttcatttgagaatttagagatttc(T)15(TA)6*	91	111684	111774	SSC	intergenic regions
'HY'_SSR53	53	p1	(A)18	18	112062	112079	SSC	protein coding regions
'HY'_SSR54	54	p1	(A)10	10	114475	114484	SSC	intergenic regions
'HY'_SSR55	55	p1	(T)10	10	116435	116444	SSC	intergenic regions
'HY'_SSR56	56	p1	(T)12	12	118273	118284	SSC	intron regions
'HY'_SSR57	57	p1	(T)12	12	122425	122436	SSC	protein coding regions
'HY'_SSR58	58	p1	(A)11	11	122787	122797	SSC	protein coding regions
'HY'_SSR59	59	p1	(T)10	10	123040	123049	SSC	protein coding regions
'HY'_SSR60	60	p1	(T)12	12	123663	123674	SSC	protein coding regions
'HY'_SSR61	61	p1	(T)10	10	123972	123981	SSC	protein coding regions
'HY'_SSR62	62	p1	(T)10	10	125375	125384	IRb	protein coding regions
'HY'_SSR63	63	p1	(T)10	10	125504	125513	IRb	protein coding regions
'HY'_SSR64	64	p1	(A)10	10	127640	127649	IRb	intergenic regions
'HY'_SSR65	65	p5	(CAACA)3	15	136762	136776	IRb	intergenic regions
Dsu 'QM'_SSR1	1	c	(A)10ttaaatt(A)10ttaaattatataaaaaactagcgaataacggagcaatactcctttcttgatagaacaagaaagtttttattgctccgttact(A)17	126	149	274	LSC	intergenic regions
Dsu 'QM'_SSR2	2	p1	(T)11	11	3509	3519	LSC	intron regions
Dsu 'QM'_SSR3	3	p1	(T)11	11	5247	5257	LSC	intron regions
Dsu 'QM'_SSR4	4	c	(T)14acttatctatcaataactcaatcaaaatgcaatt(A)11	59	6819	6877	LSC	intergenic regions
Dsu 'QM'_SSR5	5	c	(T)11aatttaagataaaatttaaatgaaactatattataaattataaaaaatgccaaattctaattaattcgaaaaatatatattat(TA)6	106	7633	7738	LSC	intergenic regions
Dsu 'QM'_SSR6	6	p1	(A)13	13	7879	7891	LSC	intergenic regions
Dsu 'QM'_SSR7	7	p2	(AT)6	12	12001	12012	LSC	intron regions
Dsu 'QM'_SSR8	8	p1	(T)11	11	12142	12152	LSC	intron regions
Dsu 'QM'_SSR9	9	p1	(A)11	11	13416	13426	LSC	intergenic regions
Dsu 'QM'_SSR10	10	p3	(TTA)4	12	14804	14815	LSC	intergenic regions
Dsu 'QM'_SSR11	11	p1	(T)13	13	15750	15762	LSC	intergenic regions
Dsu 'QM'_SSR12	12	p1	(T)10	10	15954	15963	LSC	protein coding regions
Dsu 'QM'_SSR13	13	p1	(A)16	16	17659	17674	LSC	protein coding regions
Dsu 'QM'_SSR14	14	p1	(T)12	12	17837	17848	LSC	protein coding regions
Dsu 'QM'_SSR15	15	p3	(ATT)4	12	28948	28959	LSC	intergenic regions
Dsu 'QM'_SSR16	16	p1	(A)12	12	29363	29374	LSC	intergenic regions
Dsu 'QM'_SSR17	17	p3	(ATA)6	18	30535	30552	LSC	intergenic regions
Dsu 'QM'_SSR18	18	c	(TAT)5aataatttataataataaagttgaactaatcttcattatattaaaatgacta(AAT)4	79	30718	30796	LSC	intergenic regions
Dsu 'QM'_SSR19	19	p1	(A)12	12	31482	31493	LSC	intergenic regions
Dsu 'QM'_SSR20	20	p1	(C)10	10	39112	39121	LSC	protein coding regions
Dsu 'QM'_SSR21	21	p1	(T)14	14	40759	40772	LSC	intergenic regions
Dsu 'QM'_SSR22	22	p1	(A)10	10	41487	41496	LSC	intergenic regions
Dsu 'QM'_SSR23	23	p1	(T)14	14	41974	41987	LSC	intron regions
Dsu 'QM'_SSR24	24	p1	(A)12	12	43659	43670	LSC	intron regions
Dsu 'QM'_SSR25	25	p5	(TGTAT)3	15	45485	45499	LSC	intergenic regions
Dsu 'QM'_SSR26	26	p1	(A)10	10	45760	45769	LSC	intergenic regions
Dsu 'QM'_SSR27	27	p4	(TAAA)4	16	45964	45979	LSC	intergenic regions
Dsu 'QM'_SSR28	28	p1	(T)10	10	48923	48932	LSC	intergenic regions
Dsu 'QM'_SSR29	29	c	(T)12att(A)11	26	51420	51445	LSC	intergenic regions
Dsu 'QM'_SSR30	30	p1	(T)10	10	53390	53399	LSC	protein coding regions
Dsu 'QM'_SSR31	31	p6	(ATTAAT)3	18	57997	58014	LSC	intergenic regions
Dsu 'QM'_SSR32	32	p1	(A)10	10	62555	62564	LSC	intergenic regions
Dsu 'QM'_SSR33	33	p1	(A)10	10	63201	63210	LSC	protein coding regions
Dsu 'QM'_SSR34	34	p1	(A)11	11	64418	64428	LSC	intergenic regions
Dsu 'QM'_SSR35	35	c	(T)11accacccttactttatagttgatgaatccaaaactttcaattgaactgattcttctttaaatatccattttcactatca(T)10	100	64616	64715	LSC	intergenic regions
Dsu 'QM'_SSR36	36	p1	(T)10	10	65861	65870	LSC	intergenic regions
Dsu 'QM'_SSR37	37	p1	(A)10	10	66355	66364	LSC	intergenic regions
Dsu 'QM'_SSR38	38	c	(T)13atattgat(A)14	35	66878	66912	LSC	intergenic regions
Dsu 'QM'_SSR39	39	p3	(AAT)4	12	67330	67341	LSC	intergenic regions
Dsu 'QM'_SSR40	40	p1	(T)10	10	69514	69523	LSC	intron regions
Dsu 'QM'_SSR41	41	p1	(A)10	10	69636	69645	LSC	intron regions
Dsu 'QM'_SSR42	42	p1	(A)13	13	70163	70175	LSC	intron regions
Dsu 'QM'_SSR43	43	p1	(T)15	15	73038	73052	LSC	intergenic regions
Dsu 'QM'_SSR44	44	p1	(A)10	10	75456	75465	LSC	intergenic regions
Dsu 'QM'_SSR45	45	p1	(T)17	17	75720	75736	LSC	intron regions
Dsu 'QM'_SSR46	46	p1	(T)10	10	80796	80805	LSC	intron regions
Dsu 'QM'_SSR47	47	c	(A)17gaatgaaaaaggttgtcattttttgttccatt(A)11	60	81487	81546	LSC	intergenic regions
Dsu 'QM'_SSR48	48	p5	(TGTTG)3	15	95993	96007	IRa	intergenic regions
Dsu 'QM'_SSR49	49	p1	(T)10	10	105120	105129	IRa	intergenic regions
Dsu 'QM'_SSR50	50	p1	(A)10	10	107256	107265	IRa	protein coding regions
Dsu 'QM'_SSR51	51	p1	(A)10	10	107385	107394	IRa	protein coding regions
Dsu 'QM'_SSR52	52	p1	(T)11	11	108339	108349	SSC	protein coding regions
Dsu 'QM'_SSR53	53	p3	(TTA)4	12	108498	108509	SSC	protein coding regions
Dsu 'QM'_SSR54	54	p1	(A)16	16	110771	110786	SSC	intergenic regions
Dsu 'QM'_SSR55	55	c	(AAT)4gaaaaagtaaatgtattttctttcatattttcatttgagaatttagagatttc(T)14	79	111615	111693	SSC	intergenic regions
Dsu 'QM'_SSR56	56	p1	(A)18	18	111990	112007	SSC	protein coding regions
Dsu 'QM'_SSR57	57	p1	(T)10	10	114410	114419	SSC	intergenic regions
Dsu 'QM'_SSR58	58	p1	(T)10	10	115660	115669	SSC	intergenic regions
Dsu 'QM'_SSR59	59	p1	(T)10	10	116364	116373	SSC	intergenic regions
Dsu 'QM'_SSR60	60	p1	(T)10	10	118203	118212	SSC	intron regions
Dsu 'QM'_SSR61	61	p1	(T)12	12	122331	122342	SSC	protein coding regions
Dsu 'QM'_SSR62	62	p1	(A)11	11	122705	122715	SSC	protein coding regions
Dsu 'QM'_SSR63	63	p1	(T)10	10	122958	122967	SSC	protein coding regions
Dsu 'QM'_SSR64	64	p1	(T)12	12	123575	123586	SSC	protein coding regions
Dsu 'QM'_SSR65	65	p1	(T)12	12	123884	123895	SSC	protein coding regions
Dsu 'QM'_SSR66	66	p1	(T)10	10	125287	125296	IRb	protein coding regions
Dsu 'QM'_SSR67	67	p1	(T)10	10	125416	125425	IRb	protein coding regions
Dsu 'QM'_SSR68	68	p1	(A)10	10	127552	127561	IRb	intergenic regions
Dsu 'QM'_SSR69	69	p5	(CAACA)3	15	136674	136688	IRb	intergenic regions
F1 '87M'_SSR1	1	c	(A)13ttaaattatataaaaaactagcgaataacggagcaatactcctttcttgatagaacaagaaagtttttattgctccgttact(A)22taaaaaacttcagacaaaac(A)12ttttccattttttaaatacaaataatgtttttttttatcctttac(A)21	215	146	360	LSC	intergenic regions
F1 '87M'_SSR2	2	p1	(T)10	10	3601	3610	LSC	intron regions
F1 '87M'_SSR3	3	p1	(T)11	11	5338	5348	LSC	intron regions
F1 '87M'_SSR4	4	c	(T)14acttatctatcaataactcaatcaaaatgcaatt(A)11	59	6894	6952	LSC	intergenic regions
F1 '87M'_SSR5	5	p2	(TA)7	14	7802	7815	LSC	intergenic regions
F1 '87M'_SSR6	6	p1	(A)16	16	7956	7971	LSC	intergenic regions
F1 '87M'_SSR7	7	p2	(AT)6	12	12085	12096	LSC	intron regions
F1 '87M'_SSR8	8	p1	(T)11	11	12226	12236	LSC	intron regions
F1 '87M'_SSR9	9	p1	(A)10	10	13500	13509	LSC	intergenic regions
F1 '87M'_SSR10	10	p3	(TTA)4	12	14893	14904	LSC	intergenic regions
F1 '87M'_SSR11	11	p1	(T)13	13	15839	15851	LSC	intergenic regions
F1 '87M'_SSR12	12	p1	(T)10	10	16043	16052	LSC	protein coding regions
F1 '87M'_SSR13	13	p1	(A)16	16	17748	17763	LSC	protein coding regions
F1 '87M'_SSR14	14	p1	(T)12	12	17926	17937	LSC	protein coding regions
F1 '87M'_SSR15	15	p1	(A)12	12	26914	26925	LSC	intergenic regions
F1 '87M'_SSR16	16	p3	(ATT)4	12	29011	29022	LSC	intergenic regions
F1 '87M'_SSR17	17	p1	(A)11	11	29426	29436	LSC	intergenic regions
F1 '87M'_SSR18	18	p3	(ATA)6	18	30582	30599	LSC	intergenic regions
F1 '87M'_SSR19	19	c	(TAT)5aataatttataataataaagttgaactaatcttcattatattaaaatgacta(AAT)4	79	30765	30843	LSC	intergenic regions
F1 '87M'_SSR20	20	p1	(A)12	12	31536	31547	LSC	intergenic regions
F1 '87M'_SSR21	21	p1	(C)10	10	39160	39169	LSC	intergenic regions
F1 '87M'_SSR22	22	p1	(T)12	12	40302	40313	LSC	intergenic regions
F1 '87M'_SSR23	23	p1	(A)10	10	41028	41037	LSC	intergenic regions
F1 '87M'_SSR24	24	p1	(T)13	13	41515	41527	LSC	intron regions
F1 '87M'_SSR25	25	p1	(A)13	13	43199	43211	LSC	intron regions
F1 '87M'_SSR26	26	p5	(TGTAT)3	15	45009	45023	LSC	intergenic regions
F1 '87M'_SSR27	27	p1	(A)10	10	45311	45320	LSC	intergenic regions
F1 '87M'_SSR28	28	p4	(TAAA)4	16	45515	45530	LSC	intergenic regions
F1 '87M'_SSR29	29	p1	(T)10	10	52836	52845	LSC	protein coding regions
F1 '87M'_SSR30	30	p1	(A)10	10	61983	61992	LSC	intergenic regions
F1 '87M'_SSR31	31	p1	(A)10	10	62629	62638	LSC	protein coding regions
F1 '87M'_SSR32	32	p1	(A)11	11	63846	63856	LSC	intergenic regions
F1 '87M'_SSR33	33	c	(T)11accacccttactttatagttgatgaatccaaaactttcaattgaactgattcttctttaaatatccattttcactatca(T)10	100	64044	64143	LSC	intergenic regions
F1 '87M'_SSR34	34	p1	(T)10	10	65289	65298	LSC	intergenic regions
F1 '87M'_SSR35	35	p1	(A)10	10	65795	65804	LSC	intergenic regions
F1 '87M'_SSR36	36	p1	(A)10	10	65984	65993	LSC	intergenic regions
F1 '87M'_SSR37	37	c	(T)10a(T)13ataattataattgat(A)14	53	66316	66368	LSC	intergenic regions
F1 '87M'_SSR38	38	c*	(A)9(ATAATAATAATAATAGACTTTTTCTTTATTTAATTGATAATAAGAATGGAGTTGAATAAAAAAATAAAAAAAGGAATCTGAACTCAAACACGAATTACCGCTTTATTCTAAAAAAACCCAAGACTCCCGATTTTTTTTCGTATCGTAACATAAAAAAAATCGTAAAAAATCTTTTTGACTCCCGGAGAATAAACTCCGGGTAATTTCATTTAAATCATTTCGGAGCATTTGTTCGAATCTTATTTTTTTATGATATCATTTGAAATCATATAAAGACAATTCCGATTTAATATAGCTATTTGTGCAAGTACTTTACGATTAAGAAGCAACTGTTTCTTGTACAGATCATTTAAAAATTGACTATAATTATAGTATACCCCCCTTTCGCGAATTA…	23	66779	66801	LSC	intergenic regions
			CTCTGGTTCAAGTCCAGGATGGCCCAGCTGCGCCAGGGAAAAGAATAAGAATAGAAGAAGCGTTTGACTCCTTCATGCATGCTCCACTTGGCCCGGGGGGATATAGCTCAGTTGGTAGAGCTCCGCTCTTGCAATTGGGTCGTTGCGATTACGGGTTGGATGTCTAATTGTCCAGGCAGTAATGATAGTATCTTGTACCTGAACCGGTGGCTCACTTTTTCTAAGTAATGGGGAAGAGGACCGAAACATGCCACTGAAAGACTCTACTGAGACAAAACAAAGATGGGCTGTCAAGAACGTAGAGGAGGTAGGATGGGCAGTTGGTCAGATCTAGTATGGATCGTACATGGACAGTAGTTGGAGTCGGCGGCTCTCCTAGGGTTCCCTAATTTTGGATCC…
			AAGAGACCCTCCTGGCCCAACCCTAGACACTCTAAGATCCTTTTTCAAACCTGCTCCCATTTCGAGTCAAGAGATAGATAAATAGACACATCCCATTCCACTGATCGGGGGTCGAAGACCAAGAAGTGAGTTATTTATACCAAGCATTCTTCTTACGGCTAGATCCAATCTCCTGGTCCCTGCGGAAAGGAAAAAGAATGTCACGTTCTTCCTTTCGGGAAGGGAGGATTAGGGAAATCCTATTGATTGCAGCTTTCTCCAGACCTCTGGGAAAGCATGAAAAAAAGGCTCGAATGGTACGATCCTTCCGTCACCCCATTCATTCTGGGTGATCTCGTAGTTCTTGGTCTGTGAAGATGCGTTGTTAGGTGCTCCATTTCCATTGAGGCCGAACCTAAA…
F1 '87M'_SSR39	39	p1	(T)10	10	68995	69004	LSC	intron regions
F1 '87M'_SSR40	40	p1	(A)10	10	69117	69126	LSC	intron regions
F1 '87M'_SSR41	41	p1	(A)14	14	69644	69657	LSC	intron regions
F1 '87M'_SSR42	42	p3	(TAA)4	12	70509	70520	LSC	intergenic regions
F1 '87M'_SSR43	43	p1	(T)15	15	72533	72547	LSC	intergenic regions
F1 '87M'_SSR44	44	p1	(T)14	14	75207	75220	LSC	intron regions
F1 '87M'_SSR45	45	p1	(A)10	10	75442	75451	LSC	intron regions
F1 '87M'_SSR46	46	p1	(T)10	10	80279	80288	LSC	intron regions
F1 '87M'_SSR47	47	c	(A)17gaatgaaaaaggttgtcattttttgttccatt(A)12	61	80970	81030	LSC	intergenic regions
F1 '87M'_SSR48	48	p1	(T)10	10	104586	104595	IRa	intergenic regions
F1 '87M'_SSR49	49	p1	(A)10	10	106722	106731	IRa	protein coding regions
F1 '87M'_SSR50	50	p1	(A)10	10	106851	106860	IRa	protein coding regions
F1 '87M'_SSR51	51	p1	(T)11	11	107806	107816	SSC	protein coding regions
F1 '87M'_SSR52	52	p3	(TTA)4	12	107965	107976	SSC	protein coding regions
F1 '87M'_SSR53	53	p1	(A)15	15	110246	110260	SSC	intergenic regions
F1 '87M'_SSR54	54	c*	(AAT)4gaaaaagtaaatgtattttctttcatattttcatttgagaatttagagatttc(T)15(TA)7*	93	111117	111209	SSC	intergenic regions
F1 '87M'_SSR55	55	p1	(A)18	18	111497	111514	SSC	protein coding regions
F1 '87M'_SSR56	56	p1	(A)10	10	113910	113919	SSC	intergenic regions
F1 '87M'_SSR57	57	p1	(T)10	10	115143	115152	SSC	intergenic regions
F1 '87M'_SSR58	58	p1	(T)10	10	115847	115856	SSC	intergenic regions
F1 '87M'_SSR59	59	p1	(T)10	10	117685	117694	SSC	intron regions
F1 '87M'_SSR60	60	p1	(T)12	12	121813	121824	SSC	protein coding regions
F1 '87M'_SSR61	61	p1	(A)11	11	122187	122197	SSC	protein coding regions
F1 '87M'_SSR62	62	p1	(T)10	10	122440	122449	SSC	protein coding regions
F1 '87M'_SSR63	63	p1	(T)12	12	123057	123068	SSC	protein coding regions
F1 '87M'_SSR64	64	p1	(T)13	13	123365	123377	SSC	protein coding regions
F1 '87M'_SSR65	65	p1	(T)10	10	124769	124778	IRb	protein coding regions
F1 '87M'_SSR66	66	p1	(T)10	10	124898	124907	IRb	protein coding regions
F1 '87M'_SSR67	67	p1	(A)10	10	127034	127043	IRb	intergenic regions
Dbr 'XB'_SSR1	1	p1	(A)17	17	218	234	LSC	intergenic regions
Dbr 'XB'_SSR2	2	p1	(A)13	13	4406	4418	LSC	intergenic regions
Dbr 'XB'_SSR3	3	p1	(T)10	10	5203	5212	LSC	intron regions
Dbr 'XB'_SSR4	4	c	(T)13acttatctatcaataactcaatcaaaatgcaatt(A)11	58	6771	6828	LSC	intergenic regions
Dbr 'XB'_SSR5	5	p1	(A)13	13	7830	7842	LSC	intergenic regions
Dbr 'XB'_SSR6	6	p2	(AT)6	12	11937	11948	LSC	intron regions
Dbr 'XB'_SSR7	7	p1	(A)11	11	13340	13350	LSC	intergenic regions
Dbr 'XB'_SSR8	8	p3	(TTA)4	12	14751	14762	LSC	intergenic regions
Dbr 'XB'_SSR9	9	p1	(T)14	14	15697	15710	LSC	intergenic regions
Dbr 'XB'_SSR10	10	p1	(T)10	10	15901	15910	LSC	protein coding regions
Dbr 'XB'_SSR11	11	p1	(A)15	15	17607	17621	LSC	protein coding regions
Dbr 'XB'_SSR12	12	p1	(T)12	12	17784	17795	LSC	protein coding regions
Dbr 'XB'_SSR13	13	p1	(A)15	15	26766	26780	LSC	intergenic regions
Dbr 'XB'_SSR14	14	p3	(ATT)4	12	28890	28901	LSC	intergenic regions
Dbr 'XB'_SSR15	15	p1	(A)14	14	29311	29324	LSC	intergenic regions
Dbr 'XB'_SSR16	16	p3	(ATA)4	12	30400	30411	LSC	intergenic regions
Dbr 'XB'_SSR17	17	c	(TAT)5aataatttataataataaagttgaactaatcttcattatattaaaatgacta(AAT)4	79	30577	30655	LSC	intergenic regions
Dbr 'XB'_SSR18	18	c	(A)11gaattaaatttagtttaacctaagttaatttatgttagtttaacctaagttaatttatgaaccactaaagga(T)10	93	31342	31434	LSC	intergenic regions
Dbr 'XB'_SSR19	19	p1	(A)12	12	35008	35019	LSC	intergenic regions
Dbr 'XB'_SSR20	20	p1	(C)10	10	38994	39003	LSC	protein coding regions
Dbr 'XB'_SSR21	21	p1	(T)12	12	40641	40652	LSC	intergenic regions
Dbr 'XB'_SSR22	22	p1	(A)15	15	41364	41378	LSC	intergenic regions
Dbr 'XB'_SSR23	23	p1	(T)10	10	41856	41865	LSC	intron regions
Dbr 'XB'_SSR24	24	p5	(TGTAT)3	15	45370	45384	LSC	intergenic regions
Dbr 'XB'_SSR25	25	p1	(A)10	10	45645	45654	LSC	intergenic regions
Dbr 'XB'_SSR26	26	p2	(TA)6	12	46871	46882	LSC	intron regions
Dbr 'XB'_SSR27	27	p1	(T)10	10	48825	48834	LSC	intergenic regions
Dbr 'XB'_SSR28	28	p6	(ATTCAT)6	36	50254	50289	LSC	intergenic regions
Dbr 'XB'_SSR29	29	c	(T)10att(A)10	23	51341	51363	LSC	intergenic regions
Dbr 'XB'_SSR30	30	p1	(T)10	10	53308	53317	LSC	intergenic regions
Dbr 'XB'_SSR31	31	p1	(T)10	10	59248	59257	LSC	intergenic regions
Dbr 'XB'_SSR32	32	p1	(A)14	14	62468	62481	LSC	intergenic regions
Dbr 'XB'_SSR33	33	p1	(A)10	10	63118	63127	LSC	protein coding regions
Dbr 'XB'_SSR34	34	p1	(A)11	11	64335	64345	LSC	intergenic regions
Dbr 'XB'_SSR35	35	c	(T)11accacccttactttatagttgatgaatccaaaactttcaattgaactgattcttctttaaatatccattttcactatca(T)10	100	64533	64632	LSC	intergenic regions
Dbr 'XB'_SSR36	36	p1	(T)10	10	65778	65787	LSC	intergenic regions
Dbr 'XB'_SSR37	37	p1	(A)10	10	66272	66281	LSC	intergenic regions
Dbr 'XB'_SSR38	38	c	(T)10a(T)15ataattgat(A)11	46	66780	66825	LSC	intergenic regions
Dbr 'XB'_SSR39	39	c*	(A)12(<A>TA)(ATA)3	24	67236	67259	LSC	intergenic regions
Dbr 'XB'_SSR40	40	p1	(T)10	10	69456	69465	LSC	intron regions
Dbr 'XB'_SSR41	41	p1	(A)10	10	69578	69587	LSC	intron regions
Dbr 'XB'_SSR42	42	p1	(A)10	10	70105	70114	LSC	intron regions
Dbr 'XB'_SSR43	43	p1	(T)14	14	70428	70441	LSC	intron regions
Dbr 'XB'_SSR44	44	p1	(T)20	20	75659	75678	LSC	intron regions
Dbr 'XB'_SSR45	45	p1	(T)13	13	80721	80733	LSC	intron regions
Dbr 'XB'_SSR46	46	c	(A)17gaatgaaaaaggttgtcattttttgttccatt(A)10	59	81416	81474	LSC	intergenic regions
Dbr 'XB'_SSR47	47	p5	(TGTTG)3	15	95926	95940	IRa	intergenic regions
Dbr 'XB'_SSR48	48	p1	(T)10	10	105053	105062	IRa	intergenic regions
Dbr 'XB'_SSR49	49	p1	(A)10	10	107189	107198	IRa	protein coding regions
Dbr 'XB'_SSR50	50	p1	(A)10	10	107318	107327	IRa	protein coding regions
Dbr 'XB'_SSR51	51	p1	(T)11	11	108273	108283	SSC	protein coding regions
Dbr 'XB'_SSR52	52	p3	(TTA)4	12	108432	108443	SSC	protein coding regions
Dbr 'XB'_SSR53	53	p1	(A)14	14	110707	110720	SSC	intergenic regions
Dbr 'XB'_SSR54	54	c*	(AAT)4gaaaaagtaaatgtattttctttcatattttcatttgagaatttagagatttc(T)17(TA)6*	93	111516	111608	SSC	intergenic regions
Dbr 'XB'_SSR55	55	p1	(A)18	18	111896	111913	SSC	protein coding regions
Dbr 'XB'_SSR56	56	p1	(A)10	10	114309	114318	SSC	intergenic regions
Dbr 'XB'_SSR57	57	p1	(T)10	10	116269	116278	SSC	intergenic regions
Dbr 'XB'_SSR58	58	p1	(T)12	12	118107	118118	SSC	intron regions
Dbr 'XB'_SSR59	59	p1	(T)12	12	122259	122270	SSC	protein coding regions
Dbr 'XB'_SSR60	60	p1	(A)11	11	122621	122631	SSC	protein coding regions
Dbr 'XB'_SSR61	61	p1	(T)10	10	122874	122883	SSC	protein coding regions
Dbr 'XB'_SSR62	62	p1	(T)12	12	123497	123508	SSC	protein coding regions
Dbr 'XB'_SSR63	63	p1	(T)10	10	123806	123815	SSC	protein coding regions
Dbr 'XB'_SSR64	64	p1	(T)10	10	125209	125218	IRb	protein coding regions
Dbr 'XB'_SSR65	65	p1	(T)10	10	125338	125347	IRb	protein coding regions
Dbr 'XB'_SSR66	66	p1	(A)10	10	127474	127483	IRb	intergenic regions
Dbr 'XB'_SSR67	67	p5	(CAACA)3	15	136596	136610	IRb	intergenic regions
Dca 'XSZH'_SSR1	1	c	(A)11tttaaattatataaaaaactagcgaataacggagcaatactcctttcttgatagaacaagaaagtttttattgctccgttact(A)16	110	139	248	LSC	intergenic regions
Dca 'XSZH'_SSR2	2	p1	(A)13	13	4420	4432	LSC	intergenic regions
Dca 'XSZH'_SSR3	3	p1	(T)10	10	5217	5226	LSC	intron regions
Dca 'XSZH'_SSR4	4	p1	(T)10	10	5839	5848	LSC	intergenic regions
Dca 'XSZH'_SSR5	5	c	(T)14acttatctatcaataactcaatcaaaatgcaat(A)12	59	6759	6817	LSC	intergenic regions
Dca 'XSZH'_SSR6	6	p1	(A)14	14	7818	7831	LSC	intergenic regions
Dca 'XSZH'_SSR7	7	p2	(AT)6	12	11923	11934	LSC	intron regions
Dca 'XSZH'_SSR8	8	p1	(T)11	11	12064	12074	LSC	intron regions
Dca 'XSZH'_SSR9	9	p1	(A)10	10	13329	13338	LSC	intergenic regions
Dca 'XSZH'_SSR10	10	p3	(TTA)4	12	14716	14727	LSC	intergenic regions
Dca 'XSZH'_SSR11	11	p1	(T)13	13	15662	15674	LSC	intergenic regions
Dca 'XSZH'_SSR12	12	p1	(T)10	10	15865	15874	LSC	protein coding regions
Dca 'XSZH'_SSR13	13	p1	(A)15	15	17571	17585	LSC	protein coding regions
Dca 'XSZH'_SSR14	14	p1	(T)12	12	17748	17759	LSC	protein coding regions
Dca 'XSZH'_SSR15	15	p1	(A)13	13	26758	26770	LSC	intergenic regions
Dca 'XSZH'_SSR16	16	p3	(ATT)4	12	28892	28903	LSC	intergenic regions
Dca 'XSZH'_SSR17	17	p1	(A)14	14	29313	29326	LSC	intergenic regions
Dca 'XSZH'_SSR18	18	p3	(ATA)4	12	30451	30462	LSC	intergenic regions
Dca 'XSZH'_SSR19	19	c	(TAT)7aataatttataataataaagttgaactaatcttcattatattaaaatgacta(AAT)4	85	30628	30712	LSC	intergenic regions
Dca 'XSZH'_SSR20	20	c	(A)12gaattaaatttagtttaacctaagttaatttatgaaccactaaagga(T)10	69	31399	31467	LSC	intergenic regions
Dca 'XSZH'_SSR21	21	p1	(A)11	11	35048	35058	LSC	intergenic regions
Dca 'XSZH'_SSR22	22	p1	(C)10	10	39033	39042	LSC	protein coding regions
Dca 'XSZH'_SSR23	23	p1	(T)11	11	40680	40690	LSC	intergenic regions
Dca 'XSZH'_SSR24	24	p1	(A)10	10	41406	41415	LSC	intergenic regions
Dca 'XSZH'_SSR25	25	p1	(T)10	10	41893	41902	LSC	intron regions
Dca 'XSZH'_SSR26	26	p5	(TGTAT)3	15	45396	45410	LSC	intergenic regions
Dca 'XSZH'_SSR27	27	p1	(A)11	11	45677	45687	LSC	intergenic regions
Dca 'XSZH'_SSR28	28	p1	(A)11	11	46660	46670	LSC	intron regions
Dca 'XSZH'_SSR29	29	p1	(T)10	10	48843	48852	LSC	intergenic regions
Dca 'XSZH'_SSR30	30	c	(T)10att(A)11	24	51333	51356	LSC	intergenic regions
Dca 'XSZH'_SSR31	31	p1	(T)10	10	53301	53310	LSC	intergenic regions
Dca 'XSZH'_SSR32	32	p1	(T)10	10	59234	59243	LSC	intergenic regions
Dca 'XSZH'_SSR33	33	p1	(A)14	14	62454	62467	LSC	intergenic regions
Dca 'XSZH'_SSR34	34	p1	(A)10	10	63104	63113	LSC	protein coding regions
Dca 'XSZH'_SSR35	35	p1	(A)11	11	64321	64331	LSC	intergenic regions
Dca 'XSZH'_SSR36	36	c	(T)11accacccttactttatagttgatgaatccaaaactttcaattgaactgattcttctttaaatatccattttcactatca(T)10	100	64519	64618	LSC	intergenic regions
Dca 'XSZH'_SSR37	37	p1	(T)10	10	65764	65773	LSC	intergenic regions
Dca 'XSZH'_SSR38	38	p1	(A)10	10	66258	66267	LSC	intergenic regions
Dca 'XSZH'_SSR39	39	c	(T)13aattgat(A)13	33	66781	66813	LSC	intergenic regions
Dca 'XSZH'_SSR40	40	c*	(A)12(<A>TA)(ATA)3	24	67224	67247	LSC	intergenic regions
Dca 'XSZH'_SSR41	41	p1	(T)10	10	69443	69452	LSC	intron regions
Dca 'XSZH'_SSR42	42	p1	(A)10	10	69565	69574	LSC	intron regions
Dca 'XSZH'_SSR43	43	p1	(A)11	11	70092	70102	LSC	intron regions
Dca 'XSZH'_SSR44	44	p1	(T)16	16	70416	70431	LSC	intron regions
Dca 'XSZH'_SSR45	45	p1	(T)16	16	75649	75664	LSC	intron regions
Dca 'XSZH'_SSR46	46	p1	(A)11	11	79450	79460	LSC	intergenic regions
Dca 'XSZH'_SSR47	47	p1	(T)13	13	80716	80728	LSC	intron regions
Dca 'XSZH'_SSR48	48	c	(A)17gaatgaaaaaggttgtcattttttgttccatt(A)11	60	81411	81470	LSC	intergenic regions
Dca 'XSZH'_SSR49	49	p5	(TGTTG)3	15	95936	95950	IRa	intergenic regions
Dca 'XSZH'_SSR50	50	p1	(T)10	10	105063	105072	IRa	intergenic regions
Dca 'XSZH'_SSR51	51	p1	(A)10	10	107199	107208	IRa	protein coding regions
Dca 'XSZH'_SSR52	52	p1	(A)10	10	107328	107337	IRa	protein coding regions
Dca 'XSZH'_SSR53	53	p1	(T)11	11	108283	108293	SSC	protein coding regions
Dca 'XSZH'_SSR54	54	p3	(TTA)4	12	108442	108453	SSC	protein coding regions
Dca 'XSZH'_SSR55	55	p1	(A)15	15	110717	110731	SSC	intergenic regions
Dca 'XSZH'_SSR56	56	c*	(AAT)4gaaaaagtaaatgtattttctttcatattttcatttgagaatttagagatttc(T)19(TA)6*	95	111527	111621	SSC	intergenic regions
Dca 'XSZH'_SSR57	57	p1	(A)18	18	111909	111926	SSC	protein coding regions
Dca 'XSZH'_SSR58	58	p1	(T)10	10	114329	114338	SSC	intergenic regions
Dca 'XSZH'_SSR59	59	p1	(T)10	10	116282	116291	SSC	intergenic regions
Dca 'XSZH'_SSR60	60	p1	(T)10	10	118120	118129	SSC	intron regions
Dca 'XSZH'_SSR61	61	p1	(T)12	12	122248	122259	SSC	protein coding regions
Dca 'XSZH'_SSR62	62	p1	(A)11	11	122610	122620	SSC	protein coding regions
Dca 'XSZH'_SSR63	63	p1	(T)10	10	122863	122872	SSC	protein coding regions
Dca 'XSZH'_SSR64	64	p1	(T)12	12	123480	123491	SSC	protein coding regions
Dca 'XSZH'_SSR65	65	p1	(T)11	11	123788	123798	SSC	intron regions
Dca 'XSZH'_SSR66	66	p1	(T)10	10	125192	125201	IRb	protein coding regions
Dca 'XSZH'_SSR67	67	p1	(T)10	10	125321	125330	IRb	protein coding regions
Dca 'XSZH'_SSR68	68	p1	(A)10	10	127457	127466	IRb	intergenic regions
Dca 'XSZH'_SSR69	69	p5	(CAACA)3	15	136579	136593	IRb	intergenic regions
Dch 'DPD'_SSR1	1	c	(A)14ttaaattatataaaaaactagcgaataacggagcaatactcctttcttgatagaacaagaaagtttttattgctccgttact(A)13	109	147	255	LSC	intergenic regions
Dch 'DPD'_SSR2	2	p1	(T)10	10	3489	3498	LSC	intron regions
Dch 'DPD'_SSR3	3	p1	(T)11	11	5233	5243	LSC	intron regions
Dch 'DPD'_SSR4	4	c	(T)13acttatctatcaataactcaatcaaaatgcaatt(A)11	58	6787	6844	LSC	intergenic regions
Dch 'DPD'_SSR5	5	p2	(TA)7	14	7694	7707	LSC	intergenic regions
Dch 'DPD'_SSR6	6	p1	(A)16	16	7848	7863	LSC	intergenic regions
Dch 'DPD'_SSR7	7	p2	(AT)6	12	11962	11973	LSC	intron regions
Dch 'DPD'_SSR8	8	p1	(T)11	11	12103	12113	LSC	intron regions
Dch 'DPD'_SSR9	9	p1	(T)10	10	12252	12261	LSC	intron regions
Dch 'DPD'_SSR10	10	p1	(A)10	10	13378	13387	LSC	intergenic regions
Dch 'DPD'_SSR11	11	p3	(TTA)4	12	14771	14782	LSC	intergenic regions
Dch 'DPD'_SSR12	12	p1	(T)14	14	15717	15730	LSC	intergenic regions
Dch 'DPD'_SSR13	13	p1	(T)10	10	15922	15931	LSC	protein coding regions
Dch 'DPD'_SSR14	14	p1	(A)16	16	17627	17642	LSC	protein coding regions
Dch 'DPD'_SSR15	15	p1	(T)12	12	17805	17816	LSC	protein coding regions
Dch 'DPD'_SSR16	16	p1	(A)12	12	26786	26797	LSC	intergenic regions
Dch 'DPD'_SSR17	17	p3	(ATT)4	12	28938	28949	LSC	intergenic regions
Dch 'DPD'_SSR18	18	p1	(A)13	13	29353	29365	LSC	intergenic regions
Dch 'DPD'_SSR19	19	p3	(ATA)4	12	30525	30536	LSC	intergenic regions
Dch 'DPD'_SSR20	20	c	(TAT)5aataatttataataataaagttgaactaatcttcattatattaaaatgacta(AAT)4	79	30713	30791	LSC	intergenic regions
Dch 'DPD'_SSR21	21	p1	(A)12	12	31477	31488	LSC	intergenic regions
Dch 'DPD'_SSR22	22	p1	(C)10	10	39136	39145	LSC	protein coding regions
Dch 'DPD'_SSR23	23	p1	(T)14	14	40783	40796	LSC	intergenic regions
Dch 'DPD'_SSR24	24	p1	(A)10	10	41511	41520	LSC	intergenic regions
Dch 'DPD'_SSR25	25	p1	(T)13	13	41998	42010	LSC	intron regions
Dch 'DPD'_SSR26	26	p1	(A)12	12	43682	43693	LSC	intron regions
Dch 'DPD'_SSR27	27	p5	(TGTAT)3	15	45501	45515	LSC	intergenic regions
Dch 'DPD'_SSR28	28	p1	(A)10	10	45793	45802	LSC	intergenic regions
Dch 'DPD'_SSR29	29	p4	(TAAA)4	16	45987	46002	LSC	intergenic regions
Dch 'DPD'_SSR30	30	p1	(T)10	10	48934	48943	LSC	intergenic regions
Dch 'DPD'_SSR31	31	c	(T)11att(A)11	25	51427	51451	LSC	intergenic regions
Dch 'DPD'_SSR32	32	p1	(T)10	10	53396	53405	LSC	protein coding regions
Dch 'DPD'_SSR33	33	c	(A)10gaagggggattctttgatcatttatacgaaaaaaatgataaaaaaattatgatttattatacttaaattataaatttaatggga(C)10	104	62555	62658	LSC	intergenic regions
Dch 'DPD'_SSR34	34	p1	(A)10	10	63202	63211	LSC	protein coding regions
Dch 'DPD'_SSR35	35	p1	(A)11	11	64419	64429	LSC	intergenic regions
Dch 'DPD'_SSR36	36	c	(T)11accacccttactttatagttgatgaatccaaaactttcaattgaactgattcttctttaaatatccattttcactatca(T)10	100	64617	64716	LSC	intergenic regions
Dch 'DPD'_SSR37	37	p1	(T)10	10	65862	65871	LSC	intergenic regions
Dch 'DPD'_SSR38	38	p1	(A)10	10	66356	66365	LSC	intergenic regions
Dch 'DPD'_SSR39	39	c	(T)10a(T)13ataattgat(A)13	46	66869	66914	LSC	intergenic regions
Dch 'DPD'_SSR40	40	p1	(A)15	15	67325	67339	LSC	intergenic regions
Dch 'DPD'_SSR41	41	p1	(T)10	10	69522	69531	LSC	intron regions
Dch 'DPD'_SSR42	42	p1	(A)10	10	69644	69653	LSC	intron regions
Dch 'DPD'_SSR43	43	p1	(A)14	14	70171	70184	LSC	intron regions
Dch 'DPD'_SSR44	44	p1	(T)14	14	73028	73041	LSC	intergenic regions
Dch 'DPD'_SSR45	45	p1	(T)18	18	75702	75719	LSC	intron regions
Dch 'DPD'_SSR46	46	p1	(A)10	10	75941	75950	LSC	intron regions
Dch 'DPD'_SSR47	47	c	(A)16gaatgaaaaaggttgtcattttttgttccatt(A)11	59	81423	81481	LSC	intergenic regions
Dch 'DPD'_SSR48	48	p5	(TGTTG)3	15	95915	95929	IRa	intergenic regions
Dch 'DPD'_SSR49	49	p1	(T)10	10	105042	105051	IRa	intergenic regions
Dch 'DPD'_SSR50	50	p1	(A)10	10	107178	107187	IRa	protein coding regions
Dch 'DPD'_SSR51	51	p1	(A)10	10	107307	107316	IRa	protein coding regions
Dch 'DPD'_SSR52	52	p1	(T)11	11	108262	108272	SSC	protein coding regions
Dch 'DPD'_SSR53	53	p3	(TTA)4	12	108421	108432	SSC	protein coding regions
Dch 'DPD'_SSR54	54	p1	(A)15	15	110696	110710	SSC	intergenic regions
Dch 'DPD'_SSR55	55	c	(AAT)4gaaaaagtaaatgtattttctttcatattttcatttgagaatttagagatttc(T)14(AT)6	91	111539	111629	SSC	intergenic regions
Dch 'DPD'_SSR56	56	p1	(A)16	16	111918	111933	SSC	intergenic regions
Dch 'DPD'_SSR57	57	p1	(A)10	10	114330	114339	SSC	intergenic regions
Dch 'DPD'_SSR58	58	p1	(T)10	10	115587	115596	SSC	intergenic regions
Dch 'DPD'_SSR59	59	p1	(T)10	10	116291	116300	SSC	intergenic regions
Dch 'DPD'_SSR60	60	p1	(T)11	11	118129	118139	SSC	intron regions
Dch 'DPD'_SSR61	61	p1	(T)12	12	122258	122269	SSC	protein coding regions
Dch 'DPD'_SSR62	62	p1	(A)11	11	122632	122642	SSC	protein coding regions
Dch 'DPD'_SSR63	63	p1	(T)10	10	122885	122894	SSC	protein coding regions
Dch 'DPD'_SSR64	64	p1	(T)12	12	123502	123513	SSC	protein coding regions
Dch 'DPD'_SSR65	65	p1	(T)15	15	123808	123822	SSC	protein coding regions
Dch 'DPD'_SSR66	66	p1	(T)10	10	125214	125223	IRb	protein coding regions
Dch 'DPD'_SSR67	67	p1	(T)10	10	125343	125352	IRb	protein coding regions
Dch 'DPD'_SSR68	68	p1	(A)10	10	127479	127488	IRb	intergenic regions
Dch 'DPD'_SSR69	69	p5	(CAACA)3	15	136601	136615	IRb	intergenic regions
'WC'_SSR1	1	p1	(A)17	17	235	251	LSC	intergenic regions
'WC'_SSR2	2	p1	(A)13	13	4423	4435	LSC	intergenic regions
'WC'_SSR3	3	p1	(T)10	10	5220	5229	LSC	intron regions
'WC'_SSR4	4	c	(T)13acttatctatcaataactcaatcaaaatgcaatt(A)11	58	6788	6845	LSC	intergenic regions
'WC'_SSR5	5	p1	(A)13	13	7847	7859	LSC	intergenic regions
'WC'_SSR6	6	p2	(AT)6	12	11954	11965	LSC	intron regions
'WC'_SSR7	7	p1	(A)11	11	13357	13367	LSC	intergenic regions
'WC'_SSR8	8	p3	(TTA)4	12	14768	14779	LSC	intergenic regions
'WC'_SSR9	9	p1	(T)14	14	15714	15727	LSC	intergenic regions
'WC'_SSR10	10	p1	(T)10	10	15918	15927	LSC	protein coding regions
'WC'_SSR11	11	p1	(A)15	15	17624	17638	LSC	protein coding regions
'WC'_SSR12	12	p1	(T)12	12	17801	17812	LSC	protein coding regions
'WC'_SSR13	13	p1	(A)15	15	26783	26797	LSC	intergenic regions
'WC'_SSR14	14	p3	(ATT)4	12	28907	28918	LSC	intergenic regions
'WC'_SSR15	15	p1	(A)14	14	29328	29341	LSC	intergenic regions
'WC'_SSR16	16	p3	(ATA)4	12	30417	30428	LSC	intergenic regions
'WC'_SSR17	17	c	(TAT)5aataatttataataataaagttgaactaatcttcattatattaaaatgacta(AAT)4	79	30594	30672	LSC	intergenic regions
'WC'_SSR18	18	c	(A)11gaattaaatttagtttaacctaagttaatttatgttagtttaacctaagttaatttatgaaccactaaagga(T)10	93	31359	31451	LSC	intergenic regions
'WC'_SSR19	19	p1	(A)12	12	35025	35036	LSC	intergenic regions
'WC'_SSR20	20	p1	(C)10	10	39011	39020	LSC	protein coding regions
'WC'_SSR21	21	p1	(T)12	12	40658	40669	LSC	intergenic regions
'WC'_SSR22	22	p1	(A)15	15	41381	41395	LSC	intergenic regions
'WC'_SSR23	23	p1	(T)10	10	41873	41882	LSC	intron regions
'WC'_SSR24	24	p5	(TGTAT)3	15	45387	45401	LSC	intergenic regions
'WC'_SSR25	25	p1	(A)10	10	45662	45671	LSC	intergenic regions
'WC'_SSR26	26	p2	(TA)6	12	46888	46899	LSC	intron regions
'WC'_SSR27	27	p1	(T)10	10	48842	48851	LSC	intergenic regions
'WC'_SSR28	28	p6	(ATTCAT)6	36	50271	50306	LSC	intergenic regions
'WC'_SSR29	29	c	(T)10att(A)10	23	51358	51380	LSC	intergenic regions
'WC'_SSR30	30	p1	(T)10	10	53325	53334	LSC	protein coding regions
'WC'_SSR31	31	p1	(T)10	10	59265	59274	LSC	intergenic regions
'WC'_SSR32	32	p1	(A)14	14	62485	62498	LSC	intergenic regions
'WC'_SSR33	33	p1	(A)10	10	63135	63144	LSC	protein coding regions
'WC'_SSR34	34	p1	(A)11	11	64352	64362	LSC	intergenic regions
'WC'_SSR35	35	c	(T)11accacccttactttatagttgatgaatccaaaactttcaattgaactgattcttctttaaatatccattttcactatca(T)10	100	64550	64649	LSC	intergenic regions
'WC'_SSR36	36	p1	(T)10	10	65795	65804	LSC	intergenic regions
'WC'_SSR37	37	p1	(A)10	10	66289	66298	LSC	intergenic regions
'WC'_SSR38	38	c	(T)10a(T)15ataattgat(A)11	46	66797	66842	LSC	intergenic regions
'WC'_SSR39	39	c*	(A)12(<A>TA)(ATA)3	24	67253	67276	LSC	intergenic regions
'WC'_SSR40	40	p1	(T)10	10	69473	69482	LSC	intron regions
'WC'_SSR41	41	p1	(A)10	10	69595	69604	LSC	intron regions
'WC'_SSR42	42	p1	(A)10	10	70122	70131	LSC	intron regions
'WC'_SSR43	43	p1	(T)14	14	70445	70458	LSC	intron regions
'WC'_SSR44	44	p1	(T)20	20	75676	75695	LSC	intron regions
'WC'_SSR45	45	p1	(T)13	13	80738	80750	LSC	intron regions
'WC'_SSR46	46	c	(A)17gaatgaaaaaggttgtcattttttgttccatt(A)10	59	81433	81491	LSC	intergenic regions
'WC'_SSR47	47	p5	(TGTTG)3	15	95943	95957	IRa	intergenic regions
'WC'_SSR48	48	p1	(T)10	10	105070	105079	IRa	intergenic regions
'WC'_SSR49	49	p1	(A)10	10	107206	107215	IRa	protein coding regions
'WC'_SSR50	50	p1	(A)10	10	107335	107344	IRa	protein coding regions
'WC'_SSR51	51	p1	(T)11	11	108290	108300	SSC	protein coding regions
'WC'_SSR52	52	p3	(TTA)4	12	108449	108460	SSC	protein coding regions
'WC'_SSR53	53	p1	(A)14	14	110724	110737	SSC	intergenic regions
'WC'_SSR54	54	c*	(AAT)4gaaaaagtaaatgtattttctttcatattttcatttgagaatttagagatttc(T)17(TA)6*	93	111533	111625	SSC	intergenic regions
'WC'_SSR55	55	p1	(A)18	18	111913	111930	SSC	protein coding regions
'WC'_SSR56	56	p1	(A)10	10	114326	114335	SSC	intergenic regions
'WC'_SSR57	57	p1	(T)10	10	116286	116295	SSC	intergenic regions
'WC'_SSR58	58	p1	(T)12	12	118124	118135	SSC	intron regions
'WC'_SSR59	59	p1	(T)12	12	122276	122287	SSC	protein coding regions
'WC'_SSR60	60	p1	(A)11	11	122638	122648	SSC	protein coding regions
'WC'_SSR61	61	p1	(T)10	10	122891	122900	SSC	protein coding regions
'WC'_SSR62	62	p1	(T)12	12	123514	123525	SSC	protein coding regions
'WC'_SSR63	63	p1	(T)10	10	123823	123832	SSC	protein coding regions
'WC'_SSR64	64	p1	(T)10	10	125226	125235	IRb	protein coding regions
'WC'_SSR65	65	p1	(T)10	10	125355	125364	IRb	protein coding regions
'WC'_SSR66	66	p1	(A)10	10	127491	127500	IRb	intergenic regions
'WC'_SSR67	67	p5	(CAACA)3	15	136613	136627	IRb	intergenic regions
Dch 'X'_SSR1	1	p1	(A)16	16	94	109	LSC	intergenic regions
Dch 'X'_SSR2	2	c	(A)14ttaaattatataaaaaactagcgaataacggagcaatactcctttcttgatagaacaagaaagtttttattgctccgttact(A)13	109	607	715	LSC	intergenic regions
Dch 'X'_SSR3	3	p1	(T)10	10	3949	3958	LSC	intron regions
Dch 'X'_SSR4	4	p1	(T)11	11	5693	5703	LSC	intron regions
Dch 'X'_SSR5	5	c	(T)13acttatctatcaataactcaatcaaaatgcaatt(A)11	58	7247	7304	LSC	intergenic regions
Dch 'X'_SSR6	6	p2	(TA)7	14	8154	8167	LSC	intergenic regions
Dch 'X'_SSR7	7	p2	(AT)6	12	11958	11969	LSC	intron regions
Dch 'X'_SSR8	8	p1	(T)11	11	12099	12109	LSC	intron regions
Dch 'X'_SSR9	9	p1	(T)10	10	12248	12257	LSC	intron regions
Dch 'X'_SSR10	10	p1	(A)10	10	13374	13383	LSC	intergenic regions
Dch 'X'_SSR11	11	p3	(TTA)4	12	14767	14778	LSC	intergenic regions
Dch 'X'_SSR12	12	p1	(T)14	14	15713	15726	LSC	intergenic regions
Dch 'X'_SSR13	13	p1	(T)10	10	15918	15927	LSC	protein coding regions
Dch 'X'_SSR14	14	p1	(A)16	16	17623	17638	LSC	protein coding regions
Dch 'X'_SSR15	15	p1	(T)12	12	17801	17812	LSC	protein coding regions
Dch 'X'_SSR16	16	p1	(A)12	12	26782	26793	LSC	intergenic regions
Dch 'X'_SSR17	17	p3	(ATT)4	12	28934	28945	LSC	intergenic regions
Dch 'X'_SSR18	18	p1	(A)13	13	29349	29361	LSC	intergenic regions
Dch 'X'_SSR19	19	p3	(ATA)4	12	30521	30532	LSC	intergenic regions
Dch 'X'_SSR20	20	c	(TAT)5aataatttataataataaagttgaactaatcttcattatattaaaatgacta(AAT)4	79	30709	30787	LSC	intergenic regions
Dch 'X'_SSR21	21	p1	(A)12	12	31473	31484	LSC	intergenic regions
Dch 'X'_SSR22	22	p1	(C)10	10	39132	39141	LSC	protein coding regions
Dch 'X'_SSR23	23	p1	(T)14	14	40779	40792	LSC	intergenic regions
Dch 'X'_SSR24	24	p1	(A)10	10	41507	41516	LSC	intergenic regions
Dch 'X'_SSR25	25	p1	(T)13	13	41994	42006	LSC	intron regions
Dch 'X'_SSR26	26	p1	(A)12	12	43678	43689	LSC	intron regions
Dch 'X'_SSR27	27	p5	(TGTAT)3	15	45497	45511	LSC	intergenic regions
Dch 'X'_SSR28	28	p1	(A)10	10	45789	45798	LSC	intergenic regions
Dch 'X'_SSR29	29	p4	(TAAA)4	16	45983	45998	LSC	intergenic regions
Dch 'X'_SSR30	30	p1	(T)10	10	48930	48939	LSC	intergenic regions
Dch 'X'_SSR31	31	c	(T)11att(A)11	25	51423	51447	LSC	intergenic regions
Dch 'X'_SSR32	32	p1	(T)10	10	53392	53401	LSC	protein coding regions
Dch 'X'_SSR33	33	c	(A)10gaagggggattctttgatcatttatacgaaaaaaatgataaaaaaattatgatttattatacttaaattataaatttaatggga(C)10	104	62551	62654	LSC	intergenic regions
Dch 'X'_SSR34	34	p1	(A)10	10	63198	63207	LSC	protein coding regions
Dch 'X'_SSR35	35	p1	(A)11	11	64415	64425	LSC	intergenic regions
Dch 'X'_SSR36	36	c	(T)11accacccttactttatagttgatgaatccaaaactttcaattgaactgattcttctttaaatatccattttcactatca(T)10	100	64613	64712	LSC	intergenic regions
Dch 'X'_SSR37	37	p1	(T)10	10	65858	65867	LSC	intergenic regions
Dch 'X'_SSR38	38	p1	(A)10	10	66352	66361	LSC	intergenic regions
Dch 'X'_SSR39	39	c	(T)10a(T)13ataattgat(A)13	46	66865	66910	LSC	intergenic regions
Dch 'X'_SSR40	40	p1	(A)15	15	67321	67335	LSC	intergenic regions
Dch 'X'_SSR41	41	p1	(T)10	10	69518	69527	LSC	intron regions
Dch 'X'_SSR42	42	p1	(A)10	10	69640	69649	LSC	intron regions
Dch 'X'_SSR43	43	p1	(A)14	14	70167	70180	LSC	intron regions
Dch 'X'_SSR44	44	p1	(T)14	14	73024	73037	LSC	protein coding regions
Dch 'X'_SSR45	45	p1	(T)18	18	75698	75715	LSC	intron regions
Dch 'X'_SSR46	46	p1	(A)10	10	75937	75946	LSC	intron regions
Dch 'X'_SSR47	47	c	(A)16gaatgaaaaaggttgtcattttttgttccatt(A)11	59	81419	81477	LSC	intergenic regions
Dch 'X'_SSR48	48	p5	(TGTTG)3	15	95911	95925	IRa	intergenic regions
Dch 'X'_SSR49	49	p1	(T)10	10	105038	105047	IRa	intergenic regions
Dch 'X'_SSR50	50	p1	(A)10	10	107174	107183	IRa	protein coding regions
Dch 'X'_SSR51	51	p1	(A)10	10	107303	107312	IRa	protein coding regions
Dch 'X'_SSR52	52	p1	(T)11	11	108258	108268	SSC	protein coding regions
Dch 'X'_SSR53	53	p3	(TTA)4	12	108417	108428	SSC	protein coding regions
Dch 'X'_SSR54	54	p1	(A)15	15	110692	110706	SSC	intergenic regions
Dch 'X'_SSR55	55	c	(AAT)4gaaaaagtaaatgtattttctttcatattttcatttgagaatttagagatttc(T)14(AT)6	91	111535	111625	SSC	protein coding regions
Dch 'X'_SSR56	56	p1	(A)16	16	111914	111929	SSC	protein coding regions
Dch 'X'_SSR57	57	p1	(A)10	10	114326	114335	SSC	intergenic regions
Dch 'X'_SSR58	58	p1	(T)10	10	115583	115592	SSC	intergenic regions
Dch 'X'_SSR59	59	p1	(T)10	10	116287	116296	SSC	intergenic regions
Dch 'X'_SSR60	60	p1	(T)11	11	118125	118135	SSC	intron regions
Dch 'X'_SSR61	61	p1	(T)12	12	122254	122265	SSC	protein coding regions
Dch 'X'_SSR62	62	p1	(A)11	11	122628	122638	SSC	protein coding regions
Dch 'X'_SSR63	63	p1	(T)10	10	122881	122890	SSC	protein coding regions
Dch 'X'_SSR64	64	p1	(T)12	12	123498	123509	SSC	protein coding regions
Dch 'X'_SSR65	65	p1	(T)15	15	123804	123818	SSC	protein coding regions
Dch 'X'_SSR66	66	p1	(T)10	10	125210	125219	IRb	protein coding regions
Dch 'X'_SSR67	67	p1	(T)10	10	125339	125348	IRb	protein coding regions
Dch 'X'_SSR68	68	p1	(A)10	10	127475	127484	IRb	intergenic regions
Dch 'X'_SSR69	69	p5	(CAACA)3	15	136597	136611	IRb	intergenic regions

## Sheet: Table S6
Table S6. Statistics of location of SSRs in Dianthus chloroplast genomes.
Location	Dch 'MH'	Dch 'dhs'	Dch 'cf'	Dch 'L'	'HY'	Dsu 'QM'	Dbr 'XB'	Dca 'XSZH'	Dch 'X'	'WC'	Dch 'DPD'	F1 '87M'
LSC	47	47	48	47	44	47	46	48	47	46	47	47
SSC	14	14	13	14	13	14	13	13	14	13	14	14
IRa	3	4	4	4	4	4	4	4	4	4	4	3
IRb	3	4	4	4	4	4	4	4	4	4	4	3

## Sheet: Table S7
Table S7. Statistics of region of SSRs in Dianthus chloroplast genomes.
Region	Dch 'MH'	Dch 'dhs'	Dch 'cf'	Dch 'L'	'HY'	Dsu 'QM'	Dbr 'XB'	Dca 'XSZH'	Dch 'X'	'WC'	Dch 'DPD'	F1 '87M'
intergenic regions	36	36	38	38	36	39	39	40	38	36	39	37
intron regions	12	12	13	12	10	12	11	13	11	13	13	13
protein coding regions	19	21	18	19	19	18	17	16	18	20	17	17

## Sheet: Table S8
Table S8. The localization of identified TFRs in Dianthus chloroplast genomes.
No.	Specise	start	end	Region	Location	Repeat unit size	Copy number	Repeat unit sequence
1	Dch 'MH'	6128	6170	intergenic regions	LSC	8	5.5	ATATTTAT
2	Dch 'MH'	6128	6175	intergenic regions	LSC	15	3.1	ATATTTATATATTAT
3	Dch 'MH'	6136	6178	intergenic regions	LSC	18	2.4	ATATTATATATTTATATC
4	Dch 'MH'	8235	8311	intergenic regions	LSC	22	3	TATATATAACTTATATAATATATATAA
5	Dch 'MH'	29875	29918	intergenic regions	LSC	21	2.1	ATATATAATATAATATATATT
6	Dch 'MH'	29885	29937	intergenic regions	LSC	12	4.6	TAATATATTAT
7	Dch 'MH'	30128	30159	intergenic regions	LSC	15	2.1	ATAAAGATTAAACTT
8	Dch 'MH'	30762	30794	intergenic regions	LSC	15	2.2	GAAATATTTATATTT
9	Dch 'MH'	45228	45309	intergenic regions	LSC	4	21	TTAT
10	Dch 'MH'	45228	45306	intergenic regions	LSC	11	6.8	TTATTTATTAT
11	Dch 'MH'	45633	45685	intergenic regions	LSC	7	7.7	TTAATAA
12	Dch 'MH'	45634	45689	intergenic regions	LSC	10	5.8	TAATTATTAA
13	Dch 'MH'	45633	45683	intergenic regions	LSC	17	3	TTAATTATTAATAATTA
14	Dch 'MH'	46381	46410	intergenic regions	LSC	15	2	TTTTATTTCTATTTG
15	Dch 'MH'	65800	65825	intergenic regions	LSC	12	2.2	AAATAAATTAAG
16	Dch 'MH'	68063	68114	intergenic regions	LSC	21	2.5	AAAATAAATAAAGATAAAGAA
17	Dch 'MH'	71174	71211	intergenic regions	LSC	19	2	TATTACCAACAGAATAGAA
18	Dch 'MH'	80520	80597	intron regions	LSC	22	3.8	TTTTGTTAGATATTAATCTAG
19	Dch 'MH'	84485	84541	intergenic regions	IRa	20	2.8	TTTAGGATAAATCAATGCAA
20	Dch 'MH'	95964	96000	intergenic regions	IRa	18	2.1	TCTTTTCTATTAGATTAG
21	Dch 'MH'	111452	111498	intergenic regions	SSC	23	2	AAAGAATTCAAGAGTTCTGTTCT
22	Dch 'MH'	114937	114981	intergenic regions	SSC	22	2	ATAGTTATAATAATATAATAAA
23	Dch 'MH'	124297	124342	protein coding regions	SSC	15	3.1	TTTATTTTTTCTTCT
24	Dch 'MH'	128218	128283	intergenic regions	IRb	32	2.1	TGGTTTTTTCATGTTGTCAAAGACTTGAACAA
25	Dch 'MH'	147896	147952	protein coding regions/intergenic regions	IRb	20	2.8	CATTGATTTATCCTAAATTG
1	Dch 'dhs'	6127	6170	intergenic regions	LSC	13	3.4	ATATTTATATATT
2	Dch 'dhs'	6109	6164	intergenic regions	LSC	21	2.8	TTCTATATTATATATGAATA
3	Dch 'dhs'	6134	6172	intergenic regions	LSC	18	2.2	TATATTATATATTCATAT
4	Dch 'dhs'	8224	8294	intergenic regions	LSC	22	3.6	ATATATATATAACTTAATAT
5	Dch 'dhs'	13491	13536	intergenic regions	LSC	18	2.6	TATAATATTTAAATTTAA
6	Dch 'dhs'	27885	27916	intergenic regions	LSC	16	2	AGATACTAATATAAAT
7	Dch 'dhs'	28651	28680	intergenic regions	LSC	15	2	TTTACCATAAACTAA
8	Dch 'dhs'	29905	29948	intergenic regions	LSC	21	2.1	ATATATAATATAATATATATT
9	Dch 'dhs'	29915	29967	intergenic regions	LSC	12	4.6	TAATATATTAT
10	Dch 'dhs'	30158	30189	intergenic regions	LSC	15	2.1	ATAAAGATTAAACTT
11	Dch 'dhs'	30521	30553	intergenic regions	LSC	11	2.9	AATATAATAAT
12	Dch 'dhs'	30810	30842	intergenic regions	LSC	15	2.2	GAAATATTTATATTT
13	Dch 'dhs'	31521	31571	intergenic regions	LSC	24	2.1	GAACCACTAAAGGATTTTTTTTTC
14	Dch 'dhs'	45305	45396	intergenic regions	LSC	4	22	TTAT
15	Dch 'dhs'	45306	45400	intergenic regions	LSC	19	5.2	TATTTATTTATTATTTATA
16	Dch 'dhs'	45309	45379	intergenic regions	LSC	29	2.3	TTATTTATATTTATATATTTATATATTTAAA
17	Dch 'dhs'	45361	45395	intergenic regions	LSC	9	3.8	TTATTTAAA
18	Dch 'dhs'	45721	45766	intergenic regions	LSC	10	4.8	TAATTATTAA
19	Dch 'dhs'	45720	45760	intergenic regions	LSC	17	2.4	TTAATTATTAATAATTA
20	Dch 'dhs'	46123	46178	intergenic regions	LSC	8	7	TTATTATA
21	Dch 'dhs'	46487	46516	intergenic regions	LSC	15	2	TTTTATTTCTATTTG
22	Dch 'dhs'	61991	62017	intergenic regions	LSC	11	2.5	ATTATAAAAAA
23	Dch 'dhs'	84531	84587	intergenic regions	IRa	20	2.8	TTTAGGATAAATCAATGCAA
24	Dch 'dhs'	96015	96051	intergenic regions	IRa	18	2.1	TCTTTTCTATTAGATTAG
25	Dch 'dhs'	118415	118460	intron regions	SSC	9	5.1	TTTTATATA
26	Dch 'dhs'	124337	124382	protein coding regions	SSC	15	3.1	TTTATTTTTTCTTCT
27	Dch 'dhs'	128258	128323	intergenic regions	IRb	32	2.1	TGGTTTTTTCATGTTGTCAAAGACTTGAACAA
28	Dch 'dhs'	147941	147997	protein coding regions/intergenic regions	IRb	20	2.8	CATTGATTTATCCTAAATTG
1	Dch 'cf'	4321	4353	intergenic regions	LSC	16	2.1	ACTAATATGGTGAAGA
2	Dch 'cf'	6128	6183	intergenic regions	LSC	21	2.8	TTCTATATTATATATGAATA
3	Dch 'cf'	8247	8295	intergenic regions	LSC	18	2.7	ATATATATATAACTTAAT
4	Dch 'cf'	13490	13535	intergenic regions	LSC	18	2.6	TATAATATTTAAATTTAA
5	Dch 'cf'	29891	29934	intergenic regions	LSC	21	2.1	ATATATAATATAATATATATT
6	Dch 'cf'	29903	29950	intergenic regions	LSC	12	4.1	ATATATTATTAT
7	Dch 'cf'	30164	30195	intergenic regions	LSC	15	2.1	ATAAAGATTAAACTT
8	Dch 'cf'	30524	30556	intergenic regions	LSC	11	2.9	AATATAATAAT
9	Dch 'cf'	45276	45367	intergenic regions	LSC	4	22	TTAT
10	Dch 'cf'	45277	45371	intergenic regions	LSC	17	5.2	TATTTATTATTTATTTATA
11	Dch 'cf'	45281	45376	intergenic regions	LSC	29	3.3	TATTATTTATTTATATATTTATATATTTAA
12	Dch 'cf'	45332	45366	intergenic regions	LSC	9	3.8	TTATTTAAA
13	Dch 'cf'	45540	45585	intergenic regions	LSC	10	4.8	TAATTATTAA
14	Dch 'cf'	45539	45579	intergenic regions	LSC	17	2.4	TTAATTATTAATAATTA
15	Dch 'cf'	45952	46007	intergenic regions	LSC	8	7	TTATTATA
16	Dch 'cf'	46316	46345	intergenic regions	LSC	15	2	TTTTATTTCTATTTG
17	Dch 'cf'	71114	71151	intergenic regions	LSC	19	2	TATTACCAACAGAATAGAA
18	Dch 'cf'	82732	82942	intergenic regions	LSC/IRa	105	2	AATTGTATGTCCAATCATGATAGGTATAATGGTAGATGCCCGAGACCAAGTTACTATTATTTCTTTTTCCGCCTTTGTGTTAAGCTTATCAATTTTTCGTAATAA
19	Dch 'cf'	84482	84538	intergenic regions/protein coding regions	IRa	20	2.8	TTTAGGATAAATCAATGCAA
20	Dch 'cf'	95966	96002	intergenic regions	IRa	18	2.1	TCTTTTCTATTAGATTAG
21	Dch 'cf'	124292	124337	protein coding regions	SSC	15	3.1	TTTATTTTTTCTTCT
22	Dch 'cf'	128219	128284	intergenic regions	IRb	32	2.1	TGGTTTTTTCATGTTGTCAAAGACTTGAACAA
23	Dch 'cf'	147902	147958	protein coding regions/intergenic regions	IRb	20	2.8	CATTGATTTATCCTAAATTG
1	Dch 'L'	6127	6170	intergenic regions	LSC	13	3.4	ATATTTATATATT
2	Dch 'L'	6109	6164	intergenic regions	LSC	21	2.8	TTCTATATTATATATGAATA
3	Dch 'L'	6134	6172	intergenic regions	LSC	18	2.2	TATATTATATATTCATAT
4	Dch 'L'	8224	8294	intergenic regions	LSC	22	3.6	ATATATATATAACTTAATAT
5	Dch 'L'	13491	13536	intergenic regions	LSC	18	2.6	TATAATATTTAAATTTAA
6	Dch 'L'	27885	27916	intergenic regions	LSC	16	2	AGATACTAATATAAAT
7	Dch 'L'	28651	28680	intergenic regions	LSC	15	2	TTTACCATAAACTAA
8	Dch 'L'	29905	29948	intergenic regions	LSC	21	2.1	ATATATAATATAATATATATT
9	Dch 'L'	29915	29967	intergenic regions	LSC	12	4.6	TAATATATTAT
10	Dch 'L'	30158	30189	intergenic regions	LSC	15	2.1	ATAAAGATTAAACTT
11	Dch 'L'	30521	30553	intergenic regions	LSC	11	2.9	AATATAATAAT
12	Dch 'L'	30810	30842	intergenic regions	LSC	15	2.2	GAAATATTTATATTT
13	Dch 'L'	31521	31571	intergenic regions	LSC	24	2.1	GAACCACTAAAGGATTTTTTTTTC
14	Dch 'L'	45305	45396	intergenic regions	LSC	4	22	TTAT
15	Dch 'L'	45306	45400	intergenic regions	LSC	19	5.2	TATTTATTTATTATTTATA
16	Dch 'L'	45309	45379	intergenic regions	LSC	29	2.3	TTATTTATATTTATATATTTATATATTTAAA
17	Dch 'L'	45361	45395	intergenic regions	LSC	9	3.8	TTATTTAAA
18	Dch 'L'	45721	45766	intergenic regions	LSC	10	4.8	TAATTATTAA
19	Dch 'L'	45720	45760	intergenic regions	LSC	17	2.4	TTAATTATTAATAATTA
20	Dch 'L'	46123	46178	intergenic regions	LSC	8	7	TTATTATA
21	Dch 'L'	46487	46516	intergenic regions	LSC	15	2	TTTTATTTCTATTTG
22	Dch 'L'	61991	62017	intergenic regions	LSC	11	2.5	ATTATAAAAAA
23	Dch 'L'	84531	84587	intergenic regions	IRa	20	2.8	TTTAGGATAAATCAATGCAA
24	Dch 'L'	96015	96051	intergenic regions	IRa	18	2.1	TCTTTTCTATTAGATTAG
25	Dch 'L'	118415	118460	intron regions	SSC	9	5.1	TTTTATATA
26	Dch 'L'	124337	124382	protein coding regions	SSC	15	3.1	TTTATTTTTTCTTCT
27	Dch 'L'	128258	128323	intergenic regions	IRb	32	2.1	TGGTTTTTTCATGTTGTCAAAGACTTGAACAA
28	Dch 'L'	147941	147997	protein coding regions/intergenic regions	IRb	20	2.8	CATTGATTTATCCTAAATTG
1	'HY'	81	128	intergenic regions	LSC	24	2	TTACTTAACAAATAATACTTTAAA
2	'HY'	6042	6068	intergenic regions	LSC	13	2.1	AAAAAATGTAGTT
3	'HY'	6130	6197	intergenic regions	LSC	27	2.5	ATATATAATATTATCTATATTATATTT
4	'HY'	6145	6197	intergenic regions	LSC	5	11.6	TATAT
5	'HY'	6145	6197	intergenic regions	LSC	18	3.2	TATATTATATATATAT
6	'HY'	6145	6198	intergenic regions	LSC	27	2	TATATTATATATTTATATCATATTATT
7	'HY'	8239	8309	intergenic regions	LSC	9	7.8	TATATAACT
8	'HY'	8236	8290	intergenic regions	LSC	18	3.1	ATATATATAACTTATATA
9	'HY'	8252	8302	intergenic regions	LSC	14	3.7	TAATATATATAACT
10	'HY'	13440	13485	intergenic regions	LSC	23	2	TGAAATATCCATCCAGTAGAAAG
11	'HY'	28654	28683	intergenic regions	LSC	15	2	TTTACCATAAACTAA
12	'HY'	29903	29946	intergenic regions	LSC	21	2.1	ATATATAATATAATATATATT
13	'HY'	29913	29965	intergenic regions	LSC	12	4.6	TAATATATTAT
14	'HY'	30156	30187	intergenic regions	LSC	15	2.1	ATAAAGATTAAACTT
15	'HY'	30761	30793	intergenic regions	LSC	15	2.2	GAAATATTTATATTT
16	'HY'	42592	42620	intron regions	LSC	10	2.9	TTTCCTTCTG
17	'HY'	45228	45336	intergenic regions	LSC	4	26	TTAT
18	'HY'	45235	45336	intergenic regions	LSC	19	6.3	TTATTTATTTAATTAT
19	'HY'	45244	45335	intergenic regions	LSC	33	2.8	TATTATTTATATTTAATATTATTTAATTTAAAA
20	'HY'	45245	45338	intergenic regions	LSC	17	5.7	ATTATTTATATTTAA
21	'HY'	45660	45689	intergenic regions	LSC	10	2.8	TTAATTATTAA
22	'HY'	46058	46134	intergenic regions	LSC	3	26.3	TTA
23	'HY'	46058	46134	intergenic regions	LSC	11	7.4	TTATTATATTA
24	'HY'	46060	46131	intergenic regions	LSC	14	5.4	ATTATATTATTATA
25	'HY'	46059	46131	intergenic regions	LSC	37	2	TATTATATATTATATATTATAAGATAATTATATTATA
26	'HY'	46444	46473	intergenic regions	LSC	15	2	TTTTATTTCTATTTG
27	'HY'	50329	50360	intergenic regions	LSC	6	5.3	ATTCAT
28	'HY'	70237	70276	intron regions	LSC	20	2	TACTTTTTGTACCTTTACCC
29	'HY'	80677	80745	intron regions	LSC	8	9.6	ATATTAT
30	'HY'	80673	80735	intron regions	LSC	21	3	TTAGATATTAATATATTATAT
31	'HY'	84614	84670	intergenic regions	IRa	20	2.8	TTTAGGATAAATCAATGCAA
32	'HY'	96089	96125	intergenic regions	IRa	18	2.1	TCTTTTCTATTAGATTAG
33	'HY'	107664	107873	protein coding regions/intergenic regions/protein coding regions	IRa/SSC	105	2	CCAGAAGATCAAGAAACATTTTTAAAACTCTTAGTTGATGCAATCATAGGACTAAAAAAAAATAAGAAATTAATAAAAAACTGGATACAAAAAATAAATAAAAAA
34	'HY'	118557	118621	intron regions	SSC	19	3.5	TTTTATATATTTATATATA
35	'HY'	118557	118605	intron regions	SSC	25	2	TTTTATATATATTATATAATTTTAA
36	'HY'	118557	118621	intron regions	SSC	9	7.1	TTTTATATA
37	'HY'	124499	124544	protein coding regions	SSC	15	3.1	TTTATTTTATATTCT
38	'HY'	128420	128485	intergenic regions	IRb	32	2.1	TGGTTTTTTCATGTTGTCAAAGACTTGAACAA
39	'HY'	148094	148150	protein coding regions/intergenic regions/protein coding regions	IRb	20	2.8	CATTGATTTATCCTAAATTG
1	Dsu 'QM'	144	192	intergenic regions	LSC	21	2.4	TAAAAAAAAAAAAATTAAA
2	Dsu 'QM'	149	183	intergenic regions	LSC	17	2.1	AAAAAAAAAATTAAATT
3	Dsu 'QM'	6138	6181	intergenic regions	LSC	13	3.4	ATATTTATATATT
4	Dsu 'QM'	6120	6175	intergenic regions	LSC	21	2.8	TTCTATATTATATATGAATA
5	Dsu 'QM'	6167	6208	intergenic regions	LSC	21	2	TTTATATATCATATTATTAAG
6	Dsu 'QM'	8266	8336	intergenic regions	LSC	22	3.6	ATATATATATAACTTAATAT
7	Dsu 'QM'	28662	28691	intergenic regions	LSC	15	2	TTTACCATAAACTAA
8	Dsu 'QM'	29915	29958	intergenic regions	LSC	21	2.1	ATATATAATATAATATATATT
9	Dsu 'QM'	29925	29977	intergenic regions	LSC	12	4.6	TAATATATTAT
10	Dsu 'QM'	30176	30207	intergenic regions	LSC	15	2.1	ATAAAGATTAAACTT
11	Dsu 'QM'	30816	30848	intergenic regions	LSC	15	2.2	GAAATATTTATATTT
12	Dsu 'QM'	45291	45381	intergenic regions	LSC	4	22	TTAT
13	Dsu 'QM'	45298	45381	intergenic regions	LSC	15	5.3	TTATTTATTTATTAT
14	Dsu 'QM'	45296	45361	intergenic regions	LSC	29	2.3	TATTATTTAATTTAATATTTATATATTTAA
15	Dsu 'QM'	45346	45380	intergenic regions	LSC	9	3.8	TTATTTAAA
16	Dsu 'QM'	45297	45390	intergenic regions	LSC	19	4.9	ATTATTTATATATATTTAA
17	Dsu 'QM'	45705	45734	intergenic regions	LSC	10	2.8	TTAATTATTAA
18	Dsu 'QM'	46110	46167	intergenic regions	LSC	8	7.3	TATTATTA
19	Dsu 'QM'	46101	46166	intergenic regions	LSC	3	23.3	TTA
20	Dsu 'QM'	46101	46166	intergenic regions	LSC	11	6.4	TTATTATATTA
21	Dsu 'QM'	46476	46505	intergenic regions	LSC	15	2	TTTTATTTCTATTTG
22	Dsu 'QM'	61992	62018	intergenic regions	LSC	11	2.5	ATTATAAAAAA
23	Dsu 'QM'	70585	70624	intron regions	LSC	19	2.1	TATTAGTTAAAAGTAAAAG
24	Dsu 'QM'	80628	80687	intron regions	LSC	20	3	GATTTTTTTGTTATATATTA
25	Dsu 'QM'	84597	84653	intergenic regions	IRa	20	2.8	TTTAGGATAAATCAATGCAA
26	Dsu 'QM'	96094	96130	intergenic regions	IRa	18	2.1	TCTTTTCTATTAGATTAG
27	Dsu 'QM'	107722	107779	protein coding regions	IRa/SSC	24	2.5	AAAAAAAAGATAAAAAAATAATA
28	Dsu 'QM'	120625	120669	intergenic regions/protein coding regions	SSC	20	2.3	AATTAAAAAAAATTCTCAA
29	Dsu 'QM'	124411	124456	protein coding regions	SSC	15	3.1	TTTATTTTTTCTTCT
30	Dsu 'QM'	128332	128397	intergenic regions	IRb	32	2.1	TGGTTTTTTCATGTTGTCAAAGACTTGAACAA
31	Dsu 'QM'	148028	148084	protein coding regions/intergenic regions/protein coding regions	IRb	20	2.8	CATTGATTTATCCTAAATTG
1	Dbr 'XB'	6001	6027	intergenic regions	LSC	13	2.1	AAAAAATGTAGTT
2	Dbr 'XB'	6089	6156	intergenic regions	LSC	27	2.5	ATATATAATATTATCTATATTATATTT
3	Dbr 'XB'	6104	6156	intergenic regions	LSC	5	11.6	TATAT
4	Dbr 'XB'	6104	6156	intergenic regions	LSC	18	3.2	TATATTATATATATAT
5	Dbr 'XB'	6104	6157	intergenic regions	LSC	27	2	TATATTATATATTTATATCATATTATT
6	Dbr 'XB'	8202	8272	intergenic regions	LSC	9	7.8	TATATAACT
7	Dbr 'XB'	8197	8253	intergenic regions	LSC	18	3.2	TAATATATATAACTTATA
8	Dbr 'XB'	13402	13447	intergenic regions	LSC	23	2	TGAAATATCCATCCAGTAGAAAG
9	Dbr 'XB'	28616	28645	intergenic regions	LSC	15	2	TTTACCATAAACTAA
10	Dbr 'XB'	29865	29908	intergenic regions	LSC	21	2.1	ATATATAATATAATATATATT
11	Dbr 'XB'	29875	29927	intergenic regions	LSC	12	4.6	TAATATATTAT
12	Dbr 'XB'	30118	30149	intergenic regions	LSC	15	2.1	ATAAAGATTAAACTT
13	Dbr 'XB'	30675	30707	intergenic regions	LSC	15	2.2	GAAATATTTATATTT
14	Dbr 'XB'	31362	31411	intergenic regions	LSC	25	2	TTAGTTTAACCTAAGTTAATTTATG
15	Dbr 'XB'	42530	42568	intron regions	LSC	10	3.9	TTTCCTTCTG
16	Dbr 'XB'	45176	45266	intergenic regions	LSC	4	22	TTAT
17	Dbr 'XB'	45183	45266	intergenic regions	LSC	15	5.3	TTATTTATTTATTAT
18	Dbr 'XB'	45181	45246	intergenic regions	LSC	29	2.3	TATTATTTAATTTAATATTTATATATTTAA
19	Dbr 'XB'	45231	45265	intergenic regions	LSC	9	3.8	TTATTTAAA
20	Dbr 'XB'	45182	45275	intergenic regions	LSC	19	4.9	ATTATTTATATATATTTAA
21	Dbr 'XB'	45590	45619	intergenic regions	LSC	10	2.8	TTAATTATTAA
22	Dbr 'XB'	45988	46058	intergenic regions	LSC	8	9	TTATTATA
23	Dbr 'XB'	45988	46057	intergenic regions	LSC	3	24.3	TTA
24	Dbr 'XB'	45980	46050	intergenic regions	LSC	22	3.1	TAATTAATATTATTATATTATTA
25	Dbr 'XB'	45990	46059	intergenic regions	LSC	22	3	ATTATATTATTATATTATATATA
26	Dbr 'XB'	45980	46054	intergenic regions	LSC	30	2.6	TAATATAATTATATTATATATTATATATTA
27	Dbr 'XB'	45988	46049	intergenic regions	LSC	11	5.6	TTATTATTATA
28	Dbr 'XB'	46368	46397	intergenic regions	LSC	15	2	TTTTATTTCTATTTG
29	Dbr 'XB'	50254	50291	intergenic regions	LSC	6	6.3	ATTCAT
30	Dbr 'XB'	80588	80656	intron regions	LSC	8	9.6	ATATTAT
31	Dbr 'XB'	80584	80646	intron regions	LSC	21	3	TTAGATATTAATATATTATAT
32	Dbr 'XB'	82722	82760	intergenic regions	LSC	18	2.2	AATATATATTAAATAAGA
33	Dbr 'XB'	82722	82769	intergenic regions/protein coding regions	LSC	18	2.7	AATATAAATTAAATAAGA
34	Dbr 'XB'	84543	84599	intergenic regions/protein coding regions	IRa	20	2.8	TTTAGGATAAATCAATGCAA
35	Dbr 'XB'	96027	96063	intergenic regions	IRa	18	2.1	TCTTTTCTATTAGATTAG
36	Dbr 'XB'	118391	118455	intron regions	SSC	19	3.5	TTTTATATATTTATATATA
37	Dbr 'XB'	118391	118439	intron regions	SSC	25	2	TTTTATATATATTATATAATTTTAA
38	Dbr 'XB'	118391	118455	intron regions	SSC	9	7.1	TTTTATATA
39	Dbr 'XB'	124333	124378	protein coding regions	SSC	15	3.1	TTTATTTTATATTCT
40	Dbr 'XB'	128254	128319	intergenic regions	IRb	32	2.1	TGGTTTTTTCATGTTGTCAAAGACTTGAACAA
41	Dbr 'XB'	147937	147993	protein coding regions/intergenic regions/protein coding regions	IRb	20	2.8	CATTGATTTATCCTAAATTG
1	Dca 'XSZH'	6099	6142	intergenic regions	LSC	13	3.4	ATATTTATATATT
2	Dca 'XSZH'	6081	6136	intergenic regions	LSC	21	2.8	TTCTATATTATATATGAATA
3	Dca 'XSZH'	6106	6144	intergenic regions	LSC	18	2.2	TATATTATATATTCATAT
4	Dca 'XSZH'	8188	8258	intergenic regions	LSC	22	3.6	ATATATATATAACTTAATAT
5	Dca 'XSZH'	28606	28635	intergenic regions	LSC	15	2	TTTACCATAAACTAA
6	Dca 'XSZH'	28782	28807	intergenic regions	LSC	12	2.2	TTTTTTTTATAA
7	Dca 'XSZH'	29867	29910	intergenic regions	LSC	21	2.1	ATATATAATATAATATATATT
8	Dca 'XSZH'	29877	29929	intergenic regions	LSC	12	4.6	TAATATATTAT
9	Dca 'XSZH'	30120	30151	intergenic regions	LSC	15	2.1	ATAAAGATTAAACTT
10	Dca 'XSZH'	30732	30764	intergenic regions	LSC	15	2.2	GAAATATTTATATTT
11	Dca 'XSZH'	45184	45274	intergenic regions	LSC	4	22	TTAT
12	Dca 'XSZH'	45191	45274	intergenic regions	LSC	15	5.3	TTATTTATTTATTAT
13	Dca 'XSZH'	45189	45254	intergenic regions	LSC	29	2.3	TATTATTTAATTTAATATTTATATATTTAA
14	Dca 'XSZH'	45239	45273	intergenic regions	LSC	9	3.8	TTATTTAAA
15	Dca 'XSZH'	45190	45283	intergenic regions	LSC	19	4.9	ATTATTTATATATATTTAA
16	Dca 'XSZH'	45354	45391	intergenic regions	LSC	18	2.1	ATTACAATACAATGAATA
17	Dca 'XSZH'	45622	45651	intergenic regions	LSC	10	2.8	TTAATTATTAA
18	Dca 'XSZH'	46021	46076	intergenic regions	LSC	8	7	TTATTATA
19	Dca 'XSZH'	46386	46415	intergenic regions	LSC	15	2	TTTTATTTCTATTTG
20	Dca 'XSZH'	80581	80622	intron regions	LSC	21	2	TTAGATATTAATATATTATAT
21	Dca 'XSZH'	80626	80664	intron regions	LSC	19	2.1	TATATATGATTAAAAAAAA
22	Dca 'XSZH'	82867	82931	protein coding regions/intergenic regions/protein coding regions	LSC	26	2.6	TCCATCATGATAGGCATATTGTATG
23	Dca 'XSZH'	82883	82935	protein coding regions/intergenic regions/protein coding regions	LSC	26	2	ATTGTATGTCCAATCATGATAGGTAT
24	Dca 'XSZH'	84553	84609	intergenic regions	IRa	20	2.8	TTTAGGATAAATCAATGCAA
25	Dca 'XSZH'	96037	96073	intergenic regions	IRa	18	2.1	TCTTTTCTATTAGATTAG
26	Dca 'XSZH'	124316	124361	protein coding regions	SSC	15	3.1	TTTATTTTATATTCT
27	Dca 'XSZH'	128237	128302	intergenic regions	IRb	32	2.1	TGGTTTTTTCATGTTGTCAAAGACTTGAACAA
28	Dca 'XSZH'	147920	147976	protein coding regions/intergenic regions/protein coding regions	IRb	20	2.8	CATTGATTTATCCTAAATTG
1	Dch 'DPD'	6128	6171	intergenic regions	LSC	13	3.4	ATATTTATATATT
2	Dch 'DPD'	6110	6165	intergenic regions	LSC	21	2.8	TTCTATATTATATATGAATA
3	Dch 'DPD'	6135	6173	intergenic regions	LSC	18	2.2	TATATTATATATTCATAT
4	Dch 'DPD'	8225	8295	intergenic regions	LSC	22	3.6	ATATATATATAACTTAATAT
5	Dch 'DPD'	13492	13537	intergenic regions	LSC	18	2.6	TATAATATTTAAATTTAA
6	Dch 'DPD'	27886	27917	intergenic regions	LSC	16	2	AGATACTAATATAAAT
7	Dch 'DPD'	28652	28681	intergenic regions	LSC	15	2	TTTACCATAAACTAA
8	Dch 'DPD'	29906	29949	intergenic regions	LSC	21	2.1	ATATATAATATAATATATATT
9	Dch 'DPD'	29916	29968	intergenic regions	LSC	12	4.6	TAATATATTAT
10	Dch 'DPD'	30159	30190	intergenic regions	LSC	15	2.1	ATAAAGATTAAACTT
11	Dch 'DPD'	30522	30554	intergenic regions	LSC	11	2.9	AATATAATAAT
12	Dch 'DPD'	30811	30843	intergenic regions	LSC	15	2.2	GAAATATTTATATTT
13	Dch 'DPD'	31522	31572	intergenic regions	LSC	24	2.1	GAACCACTAAAGGATTTTTTTTTC
14	Dch 'DPD'	45306	45397	intergenic regions	LSC	4	22	TTAT
15	Dch 'DPD'	45307	45401	intergenic regions	LSC	19	5.2	TATTTATTTATTATTTATA
16	Dch 'DPD'	45310	45380	intergenic regions	LSC	29	2.3	TTATTTATATTTATATATTTATATATTTAAA
17	Dch 'DPD'	45362	45396	intergenic regions	LSC	9	3.8	TTATTTAAA
18	Dch 'DPD'	45722	45767	intergenic regions	LSC	10	4.8	TAATTATTAA
19	Dch 'DPD'	45721	45761	intergenic regions	LSC	17	2.4	TTAATTATTAATAATTA
20	Dch 'DPD'	46124	46179	intergenic regions	LSC	8	7	TTATTATA
21	Dch 'DPD'	46488	46517	intergenic regions	LSC	15	2	TTTTATTTCTATTTG
22	Dch 'DPD'	61992	62018	intergenic regions	LSC	11	2.5	ATTATAAAAAA
23	Dch 'DPD'	84532	84588	intergenic regions/protein coding regions	IRa	20	2.8	TTTAGGATAAATCAATGCAA
24	Dch 'DPD'	96016	96052	intergenic regions	IRa	18	2.1	TCTTTTCTATTAGATTAG
25	Dch 'DPD'	118416	118461	intron regions	SSC	9	5.1	TTTTATATA
26	Dch 'DPD'	124338	124383	protein coding regions	SSC	15	3.1	TTTATTTTTTCTTCT
27	Dch 'DPD'	128259	128324	intergenic regions	IRb	32	2.1	TGGTTTTTTCATGTTGTCAAAGACTTGAACAA
28	Dch 'DPD'	147942	147998	intergenic regions	IRb	20	2.8	CATTGATTTATCCTAAATTG
1	'WC'	6018	6044	intergenic regions	LSC	13	2.1	AAAAAATGTAGTT
2	'WC'	6106	6173	intergenic regions	LSC	27	2.5	ATATATAATATTATCTATATTATATTT
3	'WC'	6121	6173	intergenic regions	LSC	5	11.6	TATAT
4	'WC'	6121	6173	intergenic regions	LSC	18	3.2	TATATTATATATATAT
5	'WC'	6121	6174	intergenic regions	LSC	27	2	TATATTATATATTTATATCATATTATT
6	'WC'	8219	8289	intergenic regions	LSC	9	7.8	TATATAACT
7	'WC'	8214	8270	intergenic regions	LSC	18	3.2	TAATATATATAACTTATA
8	'WC'	13419	13464	intergenic regions	LSC	23	2	TGAAATATCCATCCAGTAGAAAG
9	'WC'	28633	28662	intergenic regions	LSC	15	2	TTTACCATAAACTAA
10	'WC'	29882	29925	intergenic regions	LSC	21	2.1	ATATATAATATAATATATATT
11	'WC'	29892	29944	intergenic regions	LSC	12	4.6	TAATATATTAT
12	'WC'	30135	30166	intergenic regions	LSC	15	2.1	ATAAAGATTAAACTT
13	'WC'	30692	30724	intergenic regions	LSC	15	2.2	GAAATATTTATATTT
14	'WC'	31379	31428	intergenic regions	LSC	25	2	TTAGTTTAACCTAAGTTAATTTATG
15	'WC'	42547	42585	intron regions	LSC	10	3.9	TTTCCTTCTG
16	'WC'	45193	45283	intergenic regions	LSC	4	22	TTAT
17	'WC'	45200	45283	intergenic regions	LSC	15	5.3	TTATTTATTTATTAT
18	'WC'	45198	45263	intergenic regions	LSC	29	2.3	TATTATTTAATTTAATATTTATATATTTAA
19	'WC'	45248	45282	intergenic regions	LSC	9	3.8	TTATTTAAA
20	'WC'	45199	45292	intergenic regions	LSC	19	4.9	ATTATTTATATATATTTAA
21	'WC'	45607	45636	intergenic regions	LSC	10	2.8	TTAATTATTAA
22	'WC'	46005	46075	intergenic regions	LSC	8	9	TTATTATA
23	'WC'	46005	46074	intergenic regions	LSC	3	24.3	TTA
24	'WC'	45997	46067	intergenic regions	LSC	22	3.1	TAATTAATATTATTATATTATTA
25	'WC'	46007	46076	intergenic regions	LSC	22	3	ATTATATTATTATATTATATATA
26	'WC'	45997	46071	intergenic regions	LSC	30	2.6	TAATATAATTATATTATATATTATATATTA
27	'WC'	46005	46066	intergenic regions	LSC	11	5.6	TTATTATTATA
28	'WC'	46385	46414	intergenic regions	LSC	15	2	TTTTATTTCTATTTG
29	'WC'	50271	50308	intergenic regions	LSC	6	6.3	ATTCAT
30	'WC'	80605	80673	intron regions	LSC	8	9.6	ATATTAT
31	'WC'	80601	80663	intron regions	LSC	21	3	TTAGATATTAATATATTATAT
32	'WC'	82739	82777	intergenic regions	LSC	18	2.2	AATATATATTAAATAAGA
33	'WC'	82739	82786	intergenic regions/protein coding regions	LSC	18	2.7	AATATAAATTAAATAAGA
34	'WC'	84560	84616	intergenic regions	IRa	20	2.8	TTTAGGATAAATCAATGCAA
35	'WC'	96044	96080	intergenic regions	IRa	18	2.1	TCTTTTCTATTAGATTAG
36	'WC'	118408	118472	intron regions	SSC	19	3.5	TTTTATATATTTATATATA
37	'WC'	118408	118456	intron regions	SSC	25	2	TTTTATATATATTATATAATTTTAA
38	'WC'	118408	118472	intron regions	SSC	9	7.1	TTTTATATA
39	'WC'	124350	124395	protein coding regions	SSC	15	3.1	TTTATTTTATATTCT
40	'WC'	128271	128336	intergenic regions	IRb	32	2.1	TGGTTTTTTCATGTTGTCAAAGACTTGAACAA
41	'WC'	147954	148010	protein coding regions/intergenic regions	IRb	20	2.8	CATTGATTTATCCTAAATTG
1	Dch 'X'	6588	6631	intergenic regions	LSC	13	3.4	ATATTTATATATT
2	Dch 'X'	6570	6625	intergenic regions	LSC	21	2.8	TTCTATATTATATATGAATA
3	Dch 'X'	6595	6633	intergenic regions	LSC	18	2.2	TATATTATATATTCATAT
4	Dch 'X'	8221	8291	intergenic regions	LSC	22	3.6	ATATATATATAACTTAATAT
5	Dch 'X'	13488	13533	intergenic regions	LSC	18	2.6	TATAATATTTAAATTTAA
6	Dch 'X'	27882	27913	intergenic regions	LSC	16	2	AGATACTAATATAAAT
7	Dch 'X'	28648	28677	intergenic regions	LSC	15	2	TTTACCATAAACTAA
8	Dch 'X'	29902	29945	intergenic regions	LSC	21	2.1	ATATATAATATAATATATATT
9	Dch 'X'	29912	29964	intergenic regions	LSC	12	4.6	TAATATATTAT
10	Dch 'X'	30155	30186	intergenic regions	LSC	15	2.1	ATAAAGATTAAACTT
11	Dch 'X'	30518	30550	intergenic regions	LSC	11	2.9	AATATAATAAT
12	Dch 'X'	30807	30839	intergenic regions	LSC	15	2.2	GAAATATTTATATTT
13	Dch 'X'	31518	31568	intergenic regions	LSC	24	2.1	GAACCACTAAAGGATTTTTTTTTC
14	Dch 'X'	45302	45393	intergenic regions	LSC	4	22	TTAT
15	Dch 'X'	45303	45397	intergenic regions	LSC	19	5.2	TATTTATTTATTATTTATA
16	Dch 'X'	45306	45376	intergenic regions	LSC	29	2.3	TTATTTATATTTATATATTTATATATTTAAA
17	Dch 'X'	45358	45392	intergenic regions	LSC	9	3.8	TTATTTAAA
18	Dch 'X'	45718	45763	intergenic regions	LSC	10	4.8	TAATTATTAA
19	Dch 'X'	45717	45757	intergenic regions	LSC	17	2.4	TTAATTATTAATAATTA
20	Dch 'X'	46120	46175	intergenic regions	LSC	8	7	TTATTATA
21	Dch 'X'	46484	46513	intergenic regions	LSC	15	2	TTTTATTTCTATTTG
22	Dch 'X'	61988	62014	intergenic regions	LSC	11	2.5	ATTATAAAAAA
23	Dch 'X'	84528	84584	intergenic regions/protein coding regions	IRa	20	2.8	TTTAGGATAAATCAATGCAA
24	Dch 'X'	96012	96048	intergenic regions	IRa	18	2.1	TCTTTTCTATTAGATTAG
25	Dch 'X'	118412	118457	intron regions	SSC	9	5.1	TTTTATATA
26	Dch 'X'	124334	124379	protein coding regions	SSC	15	3.1	TTTATTTTTTCTTCT
27	Dch 'X'	128255	128320	intergenic regions	IRb	32	2.1	TGGTTTTTTCATGTTGTCAAAGACTTGAACAA
28	Dch 'X'	147938	147994	protein coding regions/intergenic regions	IRb	20	2.8	CATTGATTTATCCTAAATTG
1	F1 '87M'	6229	6271	intergenic regions	LSC	8	5.5	ATATTTAT
2	F1 '87M'	6229	6276	intergenic regions	LSC	15	3.1	ATATTTATATATTAT
3	F1 '87M'	6237	6279	intergenic regions	LSC	18	2.4	ATATTATATATTTATATC
4	F1 '87M'	8336	8412	intergenic regions	LSC	22	3	TATATATAACTTATATAATATATATAA
5	F1 '87M'	29976	30019	intergenic regions	LSC	21	2.1	ATATATAATATAATATATATT
6	F1 '87M'	29986	30038	intergenic regions	LSC	12	4.6	TAATATATTAT
7	F1 '87M'	30229	30260	intergenic regions	LSC	15	2.1	ATAAAGATTAAACTT
8	F1 '87M'	30863	30895	intergenic regions	LSC	15	2.2	GAAATATTTATATTT
9	F1 '87M'	44824	44905	intergenic regions	LSC	4	21	TTAT
10	F1 '87M'	44824	44902	intergenic regions	LSC	11	6.8	TTATTTATTAT
11	F1 '87M'	45229	45281	intergenic regions	LSC	7	7.7	TTAATAA
12	F1 '87M'	45230	45285	intergenic regions	LSC	10	5.8	TAATTATTAA
13	F1 '87M'	45229	45279	intergenic regions	LSC	17	3	TTAATTATTAATAATTA
14	F1 '87M'	45977	46006	intergenic regions	LSC	15	2	TTTTATTTCTATTTG
15	F1 '87M'	65396	65421	intergenic regions	LSC	12	2.2	AAATAAATTAAG
16	F1 '87M'	67659	67710	intergenic regions	LSC	21	2.5	AAAATAAATAAAGATAAAGAA
17	F1 '87M'	70770	70807	intergenic regions	LSC	19	2	TATTACCAACAGAATAGAA
18	F1 '87M'	80116	80193	intron regions	LSC	22	3.8	TTTTGTTAGATATTAATCTAG
19	F1 '87M'	84081	84137	intergenic regions	IRa	20	2.8	TTTAGGATAAATCAATGCAA
20	F1 '87M'	95560	95596	intergenic regions	IRa	18	2.1	TCTTTTCTATTAGATTAG
21	F1 '87M'	111048	111094	intergenic regions	IRa	23	2	AAAGAATTCAAGAGTTCTGTTCT
22	F1 '87M'	114533	114577	intergenic regions	IRa	22	2	ATAGTTATAATAATATAATAAA
23	F1 '87M'	123893	123938	protein coding regions	IRa	15	3.1	TTTATTTTTTCTTCT
24	F1 '87M'	127814	127879	intergenic regions	SSC	32	2.1	TGGTTTTTTCATGTTGTCAAAGACTTGAACAA
25	F1 '87M'	147492	147548	protein coding regions/intergenic regions	IRb	20	2.8	CATTGATTTATCCTAAATTG

## Sheet: Table S9
Table S9. The localization of identified dispersed repeats in Dianthus chloroplast genomes
No.	Specise	repeat length of the 1st part	starting position of the 1st part	Region	Location	match direction	repeat length of the 2nd part	starting position of the 2nd part	Region	Location	distance of this repeat	e-value
1	Dch 'MH'	24803	82840	/	IRa	P	24803	124793	/	IRb	0	0
2	Dch 'MH'	87	41128	intergenic regions	LSC	P	87	58335	intergenic regions/protein coding regions	LSC	-3	7.52e-37
3	Dch 'MH'	50	66089	intergenic regions	LSC	P	50	66089	intergenic regions	LSC	0	4.97e-21
4	Dch 'MH'	49	41166	intergenic regions	LSC	P	49	58335	intergenic regions/protein coding regions	LSC	-1	2.92e-18
5	Dch 'MH'	45	45632	intergenic regions	LSC	P	45	45632	intergenic regions	LSC	-1	6.86e-16
6	Dch 'MH'	40	28138	intergenic regions	LSC	P	40	28138	intergenic regions	LSC	0	5.21e-15
7	Dch 'MH'	40	45643	intergenic regions	LSC	P	40	45643	intergenic regions	LSC	0	5.21e-15
8	Dch 'MH'	39	95424	intergenic regions	IRa	F	39	117722	intron regions	SSC	0	2.08e-14
9	Dch 'MH'	39	117722	intron regions	SSC	P	39	136973	intergenic regions	IRb	0	2.08e-14
10	Dch 'MH'	45	45633	intergenic regions	LSC	C	45	45638	intergenic regions	LSC	-2	4.53e-14
11	Dch 'MH'	45	45638	intergenic regions	LSC	R	45	45638	intergenic regions	LSC	-2	4.53e-14
12	Dch 'MH'	38	45633	intergenic regions	LSC	R	38	45633	intergenic regions	LSC	0	8.33e-14
13	Dch 'MH'	44	41239	intergenic regions	LSC	P	44	58258	intergenic regions	LSC	-2	1.73e-13
14	Dch 'MH'	36	45229	intergenic regions	LSC	F	36	45277	intergenic regions	LSC	-1	1.44e-10
15	Dch 'MH'	31	68062	intergenic regions	LSC	F	31	68083	intergenic regions	LSC	0	1.36e-09
16	Dch 'MH'	34	45632	intergenic regions	LSC	F	34	45649	intergenic regions	LSC	-1	2.18e-09
17	Dch 'MH'	39	45632	intergenic regions	LSC	C	39	45644	intergenic regions	LSC	-3	5.14e-09
18	Dch 'MH'	39	45632	intergenic regions	LSC	P	39	45645	intergenic regions	LSC	-3	5.14e-09
19	Dch 'MH'	30	7759	intergenic regions/protein coding regions	LSC	P	30	44366	protein coding regions/intergenic regions	LSC	0	5.46e-09
20	Dch 'MH'	33	45633	intergenic regions	LSC	P	33	45633	intergenic regions	LSC	-1	8.44e-09
21	Dch 'MH'	38	45633	intergenic regions	LSC	F	38	45643	intergenic regions	LSC	-3	1.9e-08
22	Dch 'MH'	35	45648	intergenic regions	LSC	R	35	45648	intergenic regions	LSC	-2	2.85e-08
23	Dch 'MH'	37	45648	intergenic regions	LSC	P	37	45648	intergenic regions	LSC	-3	6.99e-08
24	Dch 'MH'	37	84484	intergenic regions	IRa	F	37	84504	intergenic regions/protein coding regions	IRa	-3	6.99e-08
25	Dch 'MH'	37	84484	intergenic regions	IRa	P	37	147895	protein coding regions/intergenic regions	IRb	-3	6.99e-08
26	Dch 'MH'	37	84504	intergenic regions/protein coding regions	IRa	P	37	147915	intergenic regions	IRb	-3	6.99e-08
27	Dch 'MH'	37	147895	protein coding regions/intergenic regions	IRb	F	37	147915	intergenic regions	IRb	-3	6.99e-08
28	Dch 'MH'	30	45633	intergenic regions	LSC	C	30	45655	intergenic regions	LSC	-1	4.91e-07
29	Dch 'MH'	35	45643	intergenic regions	LSC	F	35	45650	intergenic regions	LSC	-3	9.42e-07
30	Dch 'MH'	34	7894	intergenic regions	LSC	P	34	45236	intergenic regions	LSC	-3	3.45e-06
31	Dch 'MH'	34	45650	intergenic regions	LSC	C	34	45655	intergenic regions	LSC	-3	3.45e-06
32	Dch 'MH'	34	111585	intergenic regions	SSC	F	34	111587	intergenic regions/protein coding regions	SSC	-3	3.45e-06
33	Dch 'MH'	33	45643	intergenic regions	LSC	P	33	45643	intergenic regions	LSC	-3	1.26e-05
34	Dch 'MH'	30	37475	protein coding regions	LSC	F	30	39690	protein coding regions	LSC	-2	2.14e-05
35	Dch 'MH'	30	80586	intron regions	LSC	R	30	80586	intron regions	LSC	-2	2.14e-05
36	Dch 'MH'	30	111448	intergenic regions	SSC	F	30	111471	intergenic regions	SSC	-2	2.14e-05
37	Dch 'MH'	32	9500	intergenic regions	LSC	F	32	35242	protein coding regions/intergenic regions	LSC	-3	4.57e-05
38	Dch 'MH'	31	138	intergenic regions	LSC	C	31	7597	intergenic regions	LSC	-3	0.000166
39	Dch 'MH'	31	7897	intergenic regions	LSC	P	31	45284	intergenic regions	LSC	-3	0.000166
40	Dch 'MH'	31	66720	intergenic regions	LSC	C	31	67172	protein coding regions/intergenic regions	LSC	-3	0.000166
41	Dch 'MH'	30	7759	intergenic regions/protein coding regions	LSC	F	30	34278	intergenic regions	LSC	-3	0.000598
42	Dch 'MH'	30	34278	intergenic regions	LSC	P	30	44366	intergenic regions	LSC	-3	0.000598
43	Dch 'MH'	30	41423	intergenic regions	LSC	P	30	46377	intergenic regions	LSC	-3	0.000598
1	Dch 'dhs'	24808	82886	/	IRa	P	24808	124833	/	IRb	0	0
2	Dch 'dhs'	66	41206	intergenic regions	LSC	P	66	58511	intergenic regions/protein coding regions	LSC	-3	1.43e-24
3	Dch 'dhs'	55	51410	intergenic regions	LSC	P	55	51410	intergenic regions	LSC	-1	8.01e-22
4	Dch 'dhs'	50	66245	intergenic regions	LSC	P	50	66245	intergenic regions	LSC	0	4.97e-21
5	Dch 'dhs'	53	41244	intergenic regions	LSC	P	53	58486	intergenic regions/protein coding regions	LSC	-3	4.91e-17
6	Dch 'dhs'	40	28133	intergenic regions	LSC	P	40	28133	intergenic regions	LSC	0	5.21e-15
7	Dch 'dhs'	40	45719	intergenic regions	LSC	R	40	45719	intergenic regions	LSC	0	5.21e-15
8	Dch 'dhs'	39	95470	intergenic regions	IRa	F	39	117761	intron regions	SSC	0	2.08e-14
9	Dch 'dhs'	39	117761	intron regions	SSC	P	39	137018	intergenic regions	IRb	0	2.08e-14
10	Dch 'dhs'	44	41317	intergenic regions	LSC	P	44	58413	intergenic regions	LSC	-2	1.73e-13
11	Dch 'dhs'	45	66873	intergenic regions	LSC	P	45	66873	intergenic regions	LSC	-3	1.95e-12
12	Dch 'dhs'	30	7751	intergenic regions	LSC	P	30	44443	protein coding regions	LSC	0	5.46e-09
13	Dch 'dhs'	36	6133	intergenic regions	LSC	R	36	6133	intergenic regions	LSC	-2	7.56e-09
14	Dch 'dhs'	33	45720	intergenic regions	LSC	P	33	45720	intergenic regions	LSC	-1	8.45e-09
15	Dch 'dhs'	33	45720	intergenic regions	LSC	C	33	45725	intergenic regions	LSC	-1	8.45e-09
16	Dch 'dhs'	33	45725	intergenic regions	LSC	P	33	45725	intergenic regions	LSC	-1	8.45e-09
17	Dch 'dhs'	37	84530	intergenic regions	IRa	F	37	84550	intergenic regions/protein coding regions	IRa	-3	6.99e-08
18	Dch 'dhs'	37	84530	intergenic regions	IRa	P	37	147940	protein coding regions/intergenic regions	IRb	-3	6.99e-08
19	Dch 'dhs'	37	84550	intergenic regions/protein coding regions	IRa	P	37	147960	intergenic regions	IRb	-3	6.99e-08
20	Dch 'dhs'	37	147940	protein coding regions/intergenic regions	IRb	F	37	147960	intergenic regions	IRb	-3	6.99e-08
21	Dch 'dhs'	33	31520	intergenic regions/protein coding regions	LSC	F	33	31544	intergenic regions/protein coding regions	LSC	-2	4.06e-07
22	Dch 'dhs'	30	30518	intergenic regions/protein coding regions	LSC	R	30	30521	intergenic regions/protein coding regions	LSC	-1	4.92e-07
23	Dch 'dhs'	32	114981	intergenic regions	SSC	P	32	114985	intergenic regions	SSC	-2	1.52e-06
24	Dch 'dhs'	34	7886	intergenic regions	LSC	P	34	45306	intergenic regions	LSC	-3	3.45e-06
25	Dch 'dhs'	33	111602	intergenic regions	SSC	F	33	111604	intergenic regions	SSC	-3	1.26e-05
26	Dch 'dhs'	30	37551	protein coding regions	LSC	F	30	39766	protein coding regions	LSC	-2	2.14e-05
27	Dch 'dhs'	30	45730	intergenic regions	LSC	P	30	45730	intergenic regions	LSC	-2	2.14e-05
28	Dch 'dhs'	30	80635	intron regions	LSC	R	30	80635	intron regions	LSC	-2	2.14e-05
29	Dch 'dhs'	32	9484	intergenic regions	LSC	F	32	35318	intergenic regions	LSC	-3	4.57e-05
30	Dch 'dhs'	31	45719	intergenic regions	LSC	C	31	45731	intergenic regions	LSC	-3	0.000166
31	Dch 'dhs'	30	7751	intergenic regions	LSC	F	30	34343	intergenic regions	LSC	-3	0.000599
32	Dch 'dhs'	30	8279	intergenic regions	LSC	P	30	111607	intergenic regions	LSC	-3	0.000599
33	Dch 'dhs'	30	34343	intergenic regions	LSC	P	30	44443	intergenic regions	LSC	-3	0.000599
34	Dch 'dhs'	30	41501	intergenic regions	LSC	P	30	46483	intergenic regions	LSC	-3	0.000599
35	Dch 'dhs'	30	45719	intergenic regions	LSC	F	30	45736	intergenic regions	LSC	-3	0.000599
36	Dch 'dhs'	30	45720	intergenic regions	LSC	F	30	45730	intergenic regions	LSC	-3	0.000599
37	Dch 'dhs'	30	66862	intergenic regions	LSC	R	30	75692	intron regions	LSC	-3	0.000599
1	Dch 'cf'	24808	82837	/	IRa	P	24808	124794	/	IRb	0	0
2	Dch 'cf'	106	82731	protein coding regions/intron regions	LSC	F	106	82836	intron regions/protein coding regions	LSC/IRa	0	9.56e-55
3	Dch 'cf'	105	82732	protein coding regions/intron regions	LSC	P	105	149497	intergenic regions	IRb	0	3.83e-54
4	Dch 'cf'	70	41190	intergenic regions	LSC	P	70	58347	intergenic regions/protein coding regions	LSC	-3	6.67e-27
5	Dch 'cf'	50	66077	intergenic regions	LSC	P	50	66077	intergenic regions	LSC	0	4.97e-21
6	Dch 'cf'	56	51244	intergenic regions	LSC	P	56	51244	intergenic regions	LSC	-2	1.68e-20
7	Dch 'cf'	53	41228	intergenic regions	LSC	P	53	58326	intergenic regions/protein coding regions	LSC	-3	4.91e-17
8	Dch 'cf'	40	28120	intergenic regions	LSC	P	40	28120	intergenic regions	LSC	0	5.21e-15
9	Dch 'cf'	40	45538	intergenic regions	LSC	R	40	45538	intergenic regions	LSC	0	5.21e-15
10	Dch 'cf'	39	95421	intergenic regions	IRa	F	39	117711	intron regions	SSC	0	2.08e-14
11	Dch 'cf'	39	117711	intron regions	SSC	P	39	136979	intergenic regions	IRb	0	2.08e-14
12	Dch 'cf'	44	41301	intergenic regions	LSC	P	44	58253	intergenic regions	LSC	-2	1.73e-13
13	Dch 'cf'	45	66704	intergenic regions	LSC	P	45	66704	intergenic regions	LSC	-3	1.95e-12
14	Dch 'cf'	30	7772	intergenic regions/protein coding regions	LSC	P	30	44414	intergenic regions	LSC	0	5.46e-09
15	Dch 'cf'	33	45539	intergenic regions	LSC	P	33	45539	intergenic regions	LSC	-1	8.45e-09
16	Dch 'cf'	33	45539	intergenic regions	LSC	C	33	45544	intergenic regions	LSC	-1	8.45e-09
17	Dch 'cf'	33	45544	intergenic regions	LSC	P	33	45544	intergenic regions	LSC	-1	8.45e-09
18	Dch 'cf'	37	84481	intergenic regions	IRa	F	37	84501	intergenic regions/protein coding regions	IRa	-3	6.99e-08
19	Dch 'cf'	37	84481	intergenic regions	IRa	P	37	147901	protein coding regions/intron regions	IRb	-3	6.99e-08
20	Dch 'cf'	37	84501	intergenic regions/protein coding regions	IRb	P	37	147921	intergenic regions	IRb	-3	6.99e-08
21	Dch 'cf'	37	147901	protein coding regions/intron regions	IRb	F	37	147921	intergenic regions	IRb	-3	6.99e-08
22	Dch 'cf'	30	30521	intergenic regions	LSC	R	30	30524	intergenic regions	LSC	-1	4.91e-07
23	Dch 'cf'	32	114931	intergenic regions	SSC	P	32	114935	intergenic regions	SSC	-2	1.52e-06
24	Dch 'cf'	34	7901	intergenic regions	LSC	P	34	45285	intergenic regions	LSC	-3	3.45e-06
25	Dch 'cf'	33	111552	intergenic regions	SSC	F	33	111554	intergenic regions	SSC	-3	1.26e-05
26	Dch 'cf'	30	37535	protein coding regions	LSC	F	30	39750	protein coding regions	LSC	-2	2.14e-05
27	Dch 'cf'	30	45549	intergenic regions	LSC	P	30	45549	intergenic regions	LSC	-2	2.14e-05
28	Dch 'cf'	30	80480	intron regions	LSC	R	30	80480	intron regions	LSC	-2	2.14e-05
29	Dch 'cf'	32	9483	intergenic regions	LSC	F	32	35302	intergenic regions	LSC	-3	4.57e-05
30	Dch 'cf'	31	138	intergenic regions	LSC	C	31	7610	intergenic regions	LSC	-3	0.000166
31	Dch 'cf'	31	45538	intergenic regions	LSC	C	31	45550	intergenic regions	LSC	-3	0.000166
32	Dch 'cf'	31	67147	protein coding regions/intron regions	LSC	C	31	75543	intron regions	LSC	-3	0.000166
33	Dch 'cf'	30	7772	intergenic regions/protein coding regions	LSC	F	30	34329	intergenic regions	LSC	-3	0.000598
34	Dch 'cf'	30	34329	intergenic regions	LSC	P	30	44414	intergenic regions	LSC	-3	0.000598
35	Dch 'cf'	30	41485	intergenic regions	LSC	P	30	46312	intergenic regions	LSC	-3	0.000598
36	Dch 'cf'	30	45538	intergenic regions	LSC	F	30	45555	intergenic regions	LSC	-3	0.000598
37	Dch 'cf'	30	45539	intergenic regions	LSC	F	30	45549	intergenic regions	LSC	-3	0.000598
38	Dch 'cf'	30	51244	intergenic regions	LSC	P	30	67151	protein coding regions/intron regions	LSC	-3	0.000598
39	Dch 'cf'	30	66704	intergenic regions	LSC	F	30	75550	intron regions	LSC	-3	0.000598
1	Dch 'L'	24808	82886	/	IRa	P	24808	124833	/	IRb	0	0
2	Dch 'L'	66	41206	intergenic regions	LSC	P	66	58511	intergenic regions/protein coding regions	LSC	-3	1.43e-24
3	Dch 'L'	55	51410	intergenic regions	LSC	P	55	51410	intergenic regions	LSC	-1	8.01e-22
4	Dch 'L'	50	66245	intergenic regions	LSC	P	50	66245	intergenic regions	LSC	0	4.97e-21
5	Dch 'L'	53	41244	intergenic regions	LSC	P	53	58486	intergenic regions/protein coding regions	LSC	-3	4.91e-17
6	Dch 'L'	40	28133	intergenic regions	LSC	P	40	28133	intergenic regions	LSC	0	5.21e-15
7	Dch 'L'	40	45719	intergenic regions	LSC	R	40	45719	intergenic regions	LSC	0	5.21e-15
8	Dch 'L'	39	95470	intergenic regions	IRa	F	39	117761	intron regions	SSC	0	2.08e-14
9	Dch 'L'	39	117761	intron regions	SSC	P	39	137018	intergenic regions	IRb	0	2.08e-14
10	Dch 'L'	44	41317	intergenic regions	LSC	P	44	58413	intergenic regions	LSC	-2	1.73e-13
11	Dch 'L'	45	66873	intergenic regions	LSC	P	45	66873	intergenic regions	LSC	-3	1.95e-12
12	Dch 'L'	30	7751	intergenic regions	LSC	P	30	44443	intergenic regions	LSC	0	5.46e-09
13	Dch 'L'	36	6133	intergenic regions	LSC	R	36	6133	intergenic regions	LSC	-2	7.56e-09
14	Dch 'L'	33	45720	intergenic regions	LSC	P	33	45720	intergenic regions	LSC	-1	8.45e-09
15	Dch 'L'	33	45720	intergenic regions	LSC	C	33	45725	intergenic regions	LSC	-1	8.45e-09
16	Dch 'L'	33	45725	intergenic regions	LSC	P	33	45725	intergenic regions	LSC	-1	8.45e-09
17	Dch 'L'	37	84530	intergenic regions	IRa	F	37	84550	intergenic regions/protein coding regions	IRa	-3	6.99e-08
18	Dch 'L'	37	84530	intergenic regions	IRa	P	37	147940	protein coding regions/intron regions	IRb	-3	6.99e-08
19	Dch 'L'	37	84550	intergenic regions/protein coding regions	IRa	P	37	147960	intergenic regions	IRb	-3	6.99e-08
20	Dch 'L'	37	147940	protein coding regions/intron regions	IRb	F	37	147960	intergenic regions	IRb	-3	6.99e-08
21	Dch 'L'	33	31520	intergenic regions	LSC	F	33	31544	intergenic regions	LSC	-2	4.06e-07
22	Dch 'L'	30	30518	intergenic regions	LSC	R	30	30521	intergenic regions	LSC	-1	4.92e-07
23	Dch 'L'	32	114981	intergenic regions	SSC	P	32	114985	intergenic regions	SSC	-2	1.52e-06
24	Dch 'L'	34	7886	intergenic regions	LSC	P	34	45306	intergenic regions	LSC	-3	3.45e-06
25	Dch 'L'	33	111602	intergenic regions	SSC	F	33	111604	intergenic regions	SSC	-3	1.26e-05
26	Dch 'L'	30	37551	protein coding regions	LSC	F	30	39766	protein coding regions	LSC	-2	2.14e-05
27	Dch 'L'	30	45730	intergenic regions	LSC	P	30	45730	intergenic regions	LSC	-2	2.14e-05
28	Dch 'L'	30	80635	intron regions	LSC	R	30	80635	intron regions	LSC	-2	2.14e-05
29	Dch 'L'	32	9484	intergenic regions	LSC	F	32	35318	intergenic regions	LSC	-3	4.57e-05
30	Dch 'L'	31	45719	intergenic regions	LSC	C	31	45731	intergenic regions	LSC	-3	0.000166
31	Dch 'L'	30	7751	intergenic regions	LSC	F	30	34343	intergenic regions	LSC	-3	0.000599
32	Dch 'L'	30	8279	intergenic regions	LSC	P	30	111607	intergenic regions	LSC	-3	0.000599
33	Dch 'L'	30	34343	intergenic regions	LSC	P	30	44443	intergenic regions	LSC	-3	0.000599
34	Dch 'L'	30	41501	intergenic regions	LSC	P	30	46483	intergenic regions	LSC	-3	0.000599
35	Dch 'L'	30	45719	intergenic regions	LSC	F	30	45736	intergenic regions	LSC	-3	0.000599
36	Dch 'L'	30	45720	intergenic regions	LSC	F	30	45730	intergenic regions	LSC	-3	0.000599
37	Dch 'L'	30	66862	intergenic regions	LSC	R	30	75692	intron regions	LSC	-3	0.000599
1	'HY'	24805	82963	/	IRa	P	24805	124995	/	IRb	0	0
2	'HY'	105	107663	protein coding regions/intron regions	IRa/SSC	F	105	107768	intron regions/protein coding regions	SSC	0	3.84e-54
3	'HY'	105	107768	intron regions/protein coding regions	SSC	P	105	124995	protein coding regions	IRb	0	3.84e-54
4	'HY'	87	41126	intergenic regions	LSC	P	87	58472	intergenic regions/protein coding regions	LSC	-3	7.54e-37
5	'HY'	50	66230	intergenic regions	LSC	P	50	66230	intergenic regions	LSC	0	4.98e-21
6	'HY'	53	51394	intergenic regions	LSC	P	53	51394	intergenic regions	LSC	-1	1.24e-20
7	'HY'	49	41164	intergenic regions	LSC	P	49	58472	intergenic regions/protein coding regions	LSC	-1	2.93e-18
8	'HY'	42	80672	intron regions	LSC	F	42	80693	intron regions	LSC	0	3.26e-16
9	'HY'	40	28146	intergenic regions	LSC	P	40	28146	intergenic regions	LSC	0	5.22e-15
10	'HY'	39	95553	intergenic regions	IRa	F	39	117906	intron regions	SSC	0	2.09e-14
11	'HY'	39	117906	intron regions	SSC	P	39	137171	intergenic regions	IRb	0	2.09e-14
12	'HY'	44	41237	intergenic regions	LSC	P	44	58395	intergenic regions	LSC	-2	1.74e-13
13	'HY'	30	7776	intergenic regions	LSC	P	30	44366	intergenic regions	LSC	0	5.47e-09
14	'HY'	36	118580	intron regions	SSC	R	36	118580	intron regions	SSC	-2	7.58e-09
15	'HY'	37	84613	intergenic regions	IRa	F	37	84633	intergenic regions/protein coding regions	IRa	-3	7.01e-08
16	'HY'	37	84613	intergenic regions	IRa	P	37	148093	protein coding regions/intergenic regions	IRb	-3	7.01e-08
17	'HY'	37	84633	intergenic regions/protein coding regions	IRa	P	37	148113	intergenic regions	IRb	-3	7.01e-08
18	'HY'	37	148093	protein coding regions/intergenic regions	IRb	F	37	148113	intergenic regions	IRb	-3	7.01e-08
19	'HY'	35	66860	intergenic regions	LSC	P	35	66860	intergenic regions	LSC	-3	9.45e-07
20	'HY'	30	37471	protein coding regions	LSC	F	30	39686	protein coding regions	LSC	-2	2.14e-05
21	'HY'	30	80715	intron regions	LSC	R	30	80715	intron regions	LSC	-2	2.14e-05
22	'HY'	32	9497	intergenic regions	LSC	F	32	35238	intergenic regions	LSC	-3	4.58e-05
23	'HY'	32	111748	intergenic regions	SSC	F	32	111750	intergenic regions	SSC	-3	4.58e-05
24	'HY'	31	46058	intergenic regions	LSC	F	31	61969	intergenic regions	LSC	-3	0.000166
25	'HY'	31	66847	intergenic regions	LSC	R	31	75736	intron regions	LSC	-3	0.000166
26	'HY'	31	66847	intergenic regions	LSC	F	31	75741	intron regions	LSC	-3	0.000166
27	'HY'	30	7776	intergenic regions	LSC	F	30	34271	intergenic regions	LSC	-3	0.0006
28	'HY'	30	34271	intergenic regions	LSC	P	30	44366	intergenic regions	LSC	-3	0.0006
29	'HY'	30	50324	intergenic regions	LSC	F	30	50330	intergenic regions	LSC	-3	0.0006
30	'HY'	30	66841	intergenic regions	LSC	R	30	75741	intron regions	LSC	-3	0.0006
1	Dsu 'QM'	24811	82954	/	IRa	P	24811	124915	/	IRb	0	0
2	Dsu 'QM'	87	41183	intergenic regions	LSC	P	87	58492	intergenic regions	LSC	-3	7.54e-37
3	Dsu 'QM'	50	66245	intergenic regions	LSC	P	50	66245	intergenic regions	LSC	0	4.97e-21
4	Dsu 'QM'	56	51404	intergenic regions	LSC	P	56	51404	intergenic regions	LSC	-2	1.68e-20
5	Dsu 'QM'	49	41221	intergenic regions	LSC	P	49	58492	intergenic regions/protein coding regions	LSC	-1	2.92e-18
6	Dsu 'QM'	40	28144	intergenic regions	LSC	P	40	28144	intergenic regions	LSC	0	5.22e-15
7	Dsu 'QM'	40	80627	intron regions	LSC	F	40	80647	intron regions	LSC	0	5.22e-15
8	Dsu 'QM'	39	95549	intergenic regions	IRa	F	39	117836	intron regions	SSC	0	2.09e-14
9	Dsu 'QM'	39	117836	intron regions	SSC	P	39	137092	intergenic regions	IRb	0	2.09e-14
10	Dsu 'QM'	44	41294	intergenic regions	LSC	P	44	58415	intergenic regions	LSC	-2	1.73e-13
11	Dsu 'QM'	30	7783	intergenic regions	LSC	P	30	44429	intergenic regions	LSC	0	5.47e-09
12	Dsu 'QM'	36	6144	intergenic regions	LSC	R	36	6144	intergenic regions	LSC	-2	7.57e-09
13	Dsu 'QM'	37	84596	intergenic regions	IRa	F	37	84616	intergenic regions	IRa	-3	7e-08
14	Dsu 'QM'	37	84596	intergenic regions	IRa	P	37	148027	intergenic regions/protein coding regions	IRb	-3	7e-08
15	Dsu 'QM'	37	84616	intergenic regions	IRa	P	37	148047	intergenic regions	IRb	-3	7e-08
16	Dsu 'QM'	37	148027	intergenic regions/protein coding regions	IRb	F	37	148047	intergenic regions	IRb	-3	7e-08
17	Dsu 'QM'	36	46101	intergenic regions	LSC	R	36	46112	intergenic regions	LSC	-3	2.57e-07
18	Dsu 'QM'	32	115055	intergenic regions	SSC	P	32	115059	intergenic regions	SSC	-2	1.53e-06
19	Dsu 'QM'	30	37528	intron regions	LSC	F	30	39743	intron regions	LSC	-2	2.14e-05
20	Dsu 'QM'	30	80699	intron regions	LSC	R	30	80699	intron regions	LSC	-2	2.14e-05
21	Dsu 'QM'	32	9524	intergenic regions	LSC	F	32	35295	intergenic regions	LSC	-3	4.58e-05
22	Dsu 'QM'	31	8321	intergenic regions	LSC	P	31	111679	intergenic regions	SSC	-3	0.000166
23	Dsu 'QM'	30	148	intergenic regions	LSC	F	30	165	intergenic regions	LSC	-3	0.000599
24	Dsu 'QM'	30	7783	intergenic regions	LSC	F	30	34325	intergenic regions	LSC	-3	0.000599
25	Dsu 'QM'	30	9824	intergenic regions	LSC	F	30	111687	intergenic regions/protein coding regions	SSC	-3	0.000599
26	Dsu 'QM'	30	34325	intergenic regions	LSC	P	30	44429	intergenic regions	LSC	-3	0.000599
27	Dsu 'QM'	30	41478	intergenic regions	LSC	P	30	46472	intergenic regions	LSC	-3	0.000599
28	Dsu 'QM'	30	66865	intergenic regions	LSC	F	30	75711	intron regions	LSC	-3	0.000599
1	Dbr 'X'B	24813	82893	/	IRa	P	24813	124829	/	IRb	0	0
2	Dbr 'X'B	87	41064	intergenic regions	LSC	P	87	58403	intergenic regions/protein coding regions	LSC	-3	7.53e-37
3	Dbr 'X'B	50	66162	intergenic regions	LSC	P	50	66162	intergenic regions	LSC	0	4.97e-21
4	Dbr 'X'B	53	51325	intergenic regions	LSC	P	53	51325	intergenic regions	LSC	-1	1.23e-20
5	Dbr 'X'B	49	41102	intergenic regions	LSC	P	49	58403	intergenic regions/protein coding regions	LSC	-1	2.92e-18
6	Dbr 'X'B	42	80583	intron regions	LSC	F	42	80604	intron regions	LSC	0	3.26e-16
7	Dbr 'X'B	40	28108	intergenic regions	LSC	P	40	28108	intergenic regions	LSC	0	5.21e-15
8	Dbr 'X'B	39	95482	intergenic regions	IRa	F	39	117740	intron regions	SSC	0	2.08e-14
9	Dbr 'X'B	39	117740	intron regions	SSC	P	39	137014	intergenic regions	IRb	0	2.08e-14
10	Dbr 'X'B	44	41175	intergenic regions	LSC	P	44	58326	intergenic regions	LSC	-2	1.73e-13
11	Dbr 'X'B	32	50253	intergenic regions	LSC	F	32	50259	intergenic regions	LSC	0	3.41e-10
12	Dbr 'X'B	30	7734	intergenic regions	LSC	P	30	44314	intergenic regions	LSC	0	5.46e-09
13	Dbr 'X'B	36	118414	intron regions	SSC	R	36	118414	intron regions	SSC	-2	7.56e-09
14	Dbr 'X'B	37	84542	intergenic regions	IRa	F	37	84562	intergenic regions/protein coding regions	IRa	-3	6.99e-08
15	Dbr 'X'B	37	84542	intergenic regions	IRa	P	37	147936	protein coding regions/intergenic regions	IRb	-3	6.99e-08
16	Dbr 'X'B	37	84562	intergenic regions/protein coding regions	IRa	P	37	147956	intergenic regions	IRb	-3	6.99e-08
17	Dbr 'X'B	37	147936	protein coding regions/intergenic regions	IRb	F	37	147956	intergenic regions	IRb	-3	6.99e-08
18	Dbr 'X'B	31	42529	intron regions	LSC	F	31	42539	intron regions	LSC	-1	1.27e-07
19	Dbr 'X'B	34	111580	intergenic regions	SSC	F	34	111582	intergenic regions/protein coding regions	SSC	-3	3.45e-06
20	Dbr 'X'B	33	31353	intergenic regions	LSC	F	33	31378	intergenic regions	LSC	-3	1.26e-05
21	Dbr 'X'B	30	37410	protein coding regions	LSC	F	30	39625	protein coding regions	LSC	-2	2.14e-05
22	Dbr 'X'B	30	80626	intron regions	LSC	R	30	80626	intron regions	LSC	-2	2.14e-05
23	Dbr 'X'B	32	9460	intergenic regions	LSC	F	32	35177	intergenic regions	LSC	-3	4.57e-05
24	Dbr 'X'B	32	66774	intergenic regions	LSC	R	32	75650	intron regions	LSC	-3	4.57e-05
25	Dbr 'X'B	31	41351	intergenic regions	LSC	P	31	75654	intron regions	LSC	-3	0.000166
26	Dbr 'X'B	31	45988	intergenic regions	LSC	F	31	61900	intergenic regions	LSC	-3	0.000166
27	Dbr 'X'B	31	51341	intergenic regions	LSC	P	31	79432	intergenic regions	LSC	-3	0.000166
28	Dbr 'X'B	31	59237	intergenic regions	LSC	F	31	75648	intron regions	LSC	-3	0.000166
29	Dbr 'X'B	31	66779	intergenic regions	LSC	F	31	75652	intron regions	LSC	-3	0.000166
30	Dbr 'X'B	31	66794	intergenic regions	LSC	P	31	66794	intergenic regions	LSC	-3	0.000166
31	Dbr 'X'B	30	7734	intergenic regions	LSC	F	30	34210	intergenic regions	LSC	-3	0.000599
32	Dbr 'X'B	30	8194	intergenic regions	LSC	P	30	82722	intergenic regions	LSC	-3	0.000599
33	Dbr 'X'B	30	34210	intergenic regions	LSC	P	30	44314	intergenic regions	LSC	-3	0.000599
34	Dbr 'X'B	30	50249	intergenic regions	LSC	F	30	50261	intergenic regions	LSC	-3	0.000599
35	Dbr 'X'B	30	75647	intron regions	LSC	F	30	75648	intron regions	LSC	-3	0.000599
36	Dbr 'X'B	30	82721	intergenic regions	LSC	F	30	82739	intergenic regions/protein coding regions	LSC	-3	0.000599
1	Dca 'X'SZH	24781	82935	/	IRa	P	24781	124812	/	IRb	0	0
2	Dca 'X'SZH	80	41109	intergenic regions	LSC	P	80	58394	intergenic regions	LSC	-3	9.55e-33
3	Dca 'X'SZH	63	26281	intergenic regions	LSC	P	63	26281	intergenic regions	LSC	-3	7.93e-23
4	Dca 'X'SZH	50	66148	intergenic regions	LSC	P	50	66148	intergenic regions	LSC	0	4.97e-21
5	Dca 'X'SZH	49	41140	intergenic regions	LSC	P	49	58394	intergenic regions	LSC	-1	2.92e-18
6	Dca 'X'SZH	40	28098	intergenic regions	LSC	P	40	28098	intergenic regions	LSC	0	5.21e-15
7	Dca 'X'SZH	39	95492	intergenic regions	IRa	F	39	117753	intron regions	SSC	0	2.08e-14
8	Dca 'X'SZH	39	117753	intron regions	SSC	P	39	136997	intergenic regions	IRb	0	2.08e-14
9	Dca 'X'SZH	44	41213	intergenic regions	LSC	P	44	58317	intergenic regions	LSC	-2	1.73e-13
10	Dca 'X'SZH	30	7722	intergenic regions	LSC	P	30	44322	intergenic regions	LSC	0	5.46e-09
11	Dca 'X'SZH	36	6105	intergenic regions	LSC	R	36	6105	intergenic regions	LSC	-2	7.56e-09
12	Dca 'X'SZH	37	84552	intergenic regions	IRa	F	37	84572	intergenic regions/protein coding regions	IRa	-3	6.99e-08
13	Dca 'X'SZH	37	84552	intergenic regions	IRa	P	37	147919	protein coding regions/intergenic regions	IRb	-3	6.99e-08
14	Dca 'X'SZH	37	84572	intergenic regions/protein coding regions	IRa	P	37	147939	intergenic regions	IRb	-3	6.99e-08
15	Dca 'X'SZH	37	147919	protein coding regions/intergenic regions	IRb	F	37	147939	intergenic regions	IRb	-3	6.99e-08
16	Dca 'X'SZH	36	111591	intergenic regions	SSC	F	36	111593	intergenic regions	SSC	-3	2.57e-07
17	Dca 'X'SZH	30	82882	protein coding regions/intergenic regions	LSC	F	30	82908	intergenic regions	IRa	-1	4.91e-07
18	Dca 'X'SZH	32	30618	intergenic regions	LSC	R	32	30625	intergenic regions	LSC	-2	1.52e-06
19	Dca 'X'SZH	30	37449	protein coding regions	LSC	F	30	39664	protein coding regions	LSC	-2	2.14e-05
20	Dca 'X'SZH	30	80602	intron regions	LSC	R	30	80602	intron regions	LSC	-2	2.14e-05
21	Dca 'X'SZH	32	9446	intergenic regions	LSC	F	32	35216	intergenic regions	LSC	-3	4.57e-05
22	Dca 'X'SZH	31	46021	intergenic regions	LSC	F	31	61886	intergenic regions	LSC	-3	0.000166
23	Dca 'X'SZH	31	51311	intergenic regions	LSC	P	31	51346	intergenic regions	LSC	-3	0.000166
24	Dca 'X'SZH	30	7722	intergenic regions	LSC	F	30	34243	intergenic regions	LSC	-3	0.000598
25	Dca 'X'SZH	30	34243	intergenic regions	LSC	P	30	44322	intergenic regions	LSC	-3	0.000598
26	Dca 'X'SZH	30	41397	intergenic regions	LSC	P	30	46382	intergenic regions	LSC	-3	0.000598
27	Dca 'X'SZH	30	75638	intron regions	LSC	F	30	111584	intergenic regions	SSC	-3	0.000598
28	Dca 'X'SZH	30	111587	intergenic regions	SSC	F	30	111591	intergenic regions	SSC	-3	0.000598
1	Dch 'DPD'	24807	82888	/	IRa	P	24807	124834	/	IRb	0	0
2	Dch 'DPD'	66	41207	intergenic regions	LSC	P	66	58512	intergenic regions/protein coding regions	LSC	-3	1.43e-24
3	Dch 'DPD'	55	51411	intergenic regions	LSC	P	55	51411	intergenic regions	LSC	-1	8.01e-22
4	Dch 'DPD'	50	66246	intergenic regions	LSC	P	50	66246	intergenic regions	LSC	0	4.97e-21
5	Dch 'DPD'	53	41245	intergenic regions	LSC	P	53	58487	intergenic regions/protein coding regions	LSC	-3	4.91e-17
6	Dch 'DPD'	40	28134	intergenic regions	LSC	P	40	28134	intergenic regions	LSC	0	5.21e-15
7	Dch 'DPD'	40	45720	intergenic regions	LSC	R	40	45720	intergenic regions	LSC	0	5.21e-15
8	Dch 'DPD'	39	95471	intergenic regions	IRa	F	39	117762	intron regions	SSC	0	2.08e-14
9	Dch 'DPD'	39	117762	intron regions	SSC	P	39	137019	intergenic regions	IRb	0	2.08e-14
10	Dch 'DPD'	44	41318	intergenic regions	LSC	P	44	58414	intergenic regions	LSC	-2	1.73e-13
11	Dch 'DPD'	45	66874	intergenic regions	LSC	P	45	66874	intergenic regions	LSC	-3	1.95e-12
12	Dch 'DPD'	30	7752	intergenic regions	LSC	P	30	44444	intergenic regions	LSC	0	5.46e-09
13	Dch 'DPD'	36	6134	intergenic regions	LSC	R	36	6134	intergenic regions	LSC	-2	7.56e-09
14	Dch 'DPD'	33	45721	intergenic regions	LSC	P	33	45721	intergenic regions	LSC	-1	8.45e-09
15	Dch 'DPD'	33	45721	intergenic regions	LSC	C	33	45726	intergenic regions	LSC	-1	8.45e-09
16	Dch 'DPD'	33	45726	intergenic regions	LSC	P	33	45726	intergenic regions	LSC	-1	8.45e-09
17	Dch 'DPD'	37	84531	intergenic regions	IRa	F	37	84551	intergenic regions/protein coding regions	IRa	-3	6.99e-08
18	Dch 'DPD'	37	84531	intergenic regions	IRa	P	37	147941	protein coding regions/intergenic regions	IRb	-3	6.99e-08
19	Dch 'DPD'	37	84551	intergenic regions/protein coding regions	IRa	P	37	147961	intergenic regions	IRb	-3	6.99e-08
20	Dch 'DPD'	37	147941	protein coding regions/intergenic regions	IRb	F	37	147961	intergenic regions	IRb	-3	6.99e-08
21	Dch 'DPD'	33	31521	intergenic regions	LSC	F	33	31545	intergenic regions	LSC	-2	4.06e-07
22	Dch 'DPD'	30	30519	intergenic regions	LSC	R	30	30522	intergenic regions	LSC	-1	4.92e-07
23	Dch 'DPD'	32	114982	intergenic regions	SSC	P	32	114986	intergenic regions	SSC	-2	1.52e-06
24	Dch 'DPD'	34	7887	intergenic regions	LSC	P	34	45307	intergenic regions	LSC	-3	3.45e-06
25	Dch 'DPD'	33	111603	intergenic regions	SSC	F	33	111605	intergenic regions	SSC	-3	1.26e-05
26	Dch 'DPD'	30	37552	protein coding regions	LSC	F	30	39767	protein coding regions	LSC	-2	2.14e-05
27	Dch 'DPD'	30	45731	intergenic regions	LSC	P	30	45731	intergenic regions	LSC	-2	2.14e-05
28	Dch 'DPD'	30	80636	intron regions	LSC	R	30	80636	intron regions	LSC	-2	2.14e-05
29	Dch 'DPD'	32	9485	intergenic regions	LSC	F	32	35319	intergenic regions	LSC	-3	4.57e-05
30	Dch 'DPD'	31	45720	intergenic regions	LSC	C	31	45732	intergenic regions	LSC	-3	0.000166
31	Dch 'DPD'	30	7752	intergenic regions	LSC	F	30	34344	intergenic regions	LSC	-3	0.000599
32	Dch 'DPD'	30	8280	intergenic regions	LSC	P	30	111608	intergenic regions	LSC	-3	0.000599
33	Dch 'DPD'	30	34344	intergenic regions	LSC	P	30	44444	intergenic regions	LSC	-3	0.000599
34	Dch 'DPD'	30	41502	intergenic regions	LSC	P	30	46484	intergenic regions	LSC	-3	0.000599
35	Dch 'DPD'	30	45720	intergenic regions	LSC	F	30	45737	intergenic regions	LSC	-3	0.000599
36	Dch 'DPD'	30	45721	intergenic regions	LSC	F	30	45731	intergenic regions	LSC	-3	0.000599
37	Dch 'DPD'	30	66863	intergenic regions	LSC	R	30	75693	intron regions	LSC	-3	0.000599
1	'WC'	24814	82909	/	IRa	P	24814	124846	/	IRb	0	0
2	'WC'	87	41081	intergenic regions	LSC	P	87	58420	intergenic regions/protein coding regions	LSC	-3	7.53e-37
3	'WC'	50	66179	intergenic regions	LSC	P	50	66179	intergenic regions	LSC	0	4.97e-21
4	'WC'	53	51342	intergenic regions	LSC	P	53	51342	intergenic regions	LSC	-1	1.23e-20
5	'WC'	49	41119	intergenic regions	LSC	P	49	58420	intergenic regions/protein coding regions	LSC	-1	2.92e-18
6	'WC'	42	80600	intron regions	LSC	F	42	80621	intron regions	LSC	0	3.26e-16
7	'WC'	40	28125	intergenic regions	LSC	P	40	28125	intergenic regions	LSC	0	5.21e-15
8	'WC'	39	95499	intergenic regions	IRa	F	39	117757	intron regions	SSC	0	2.08e-14
9	'WC'	39	117757	intron regions	SSC	P	39	137031	intergenic regions	IRb	0	2.08e-14
10	'WC'	44	41192	intergenic regions	LSC	P	44	58343	intergenic regions	LSC	-2	1.73e-13
11	'WC'	32	50270	intergenic regions	LSC	F	32	50276	intergenic regions	LSC	0	3.41e-10
12	'WC'	30	7751	intergenic regions	LSC	P	30	44331	intergenic regions	LSC	0	5.46e-09
13	'WC'	36	118431	intron regions	SSC	R	36	118431	intron regions	SSC	-2	7.56e-09
14	'WC'	37	84559	intergenic regions	IRa	F	37	84579	intergenic regions/protein coding regions	IRa	-3	7e-08
15	'WC'	37	84559	intergenic regions	IRa	P	37	147953	protein coding regions/intergenic regions	IRb	-3	7e-08
16	'WC'	37	84579	intergenic regions/protein coding regions	IRa	P	37	147973	intergenic regions	IRb	-3	7e-08
17	'WC'	37	147953	protein coding regions/intergenic regions	IRb	F	37	147973	intergenic regions	IRb	-3	7e-08
18	'WC'	31	42546	intron regions	LSC	F	31	42556	intron regions	LSC	-1	1.27e-07
19	'WC'	34	111597	intergenic regions	SSC	F	34	111599	intergenic regions	SSC	-3	3.45e-06
20	'WC'	33	31370	intergenic regions	LSC	F	33	31395	intergenic regions	LSC	-3	1.26e-05
21	'WC'	30	37427	protein coding regions	LSC	F	30	39642	protein coding regions	LSC	-2	2.14e-05
22	'WC'	30	80643	intron regions	LSC	R	30	80643	intron regions	LSC	-2	2.14e-05
23	'WC'	32	9477	intergenic regions	LSC	F	32	35194	intergenic regions	LSC	-3	4.57e-05
24	'WC'	32	66791	intergenic regions	LSC	R	32	75667	intron regions	LSC	-3	4.57e-05
25	'WC'	31	41368	intergenic regions	LSC	P	31	75671	intron regions	LSC	-3	0.000166
26	'WC'	31	46005	intergenic regions	LSC	F	31	61917	intergenic regions	LSC	-3	0.000166
27	'WC'	31	51358	intergenic regions	LSC	P	31	79449	intergenic regions	LSC	-3	0.000166
28	'WC'	31	59254	intergenic regions	LSC	F	31	75665	intron regions	LSC	-3	0.000166
29	'WC'	31	66796	intergenic regions	LSC	F	31	75669	intron regions	LSC	-3	0.000166
30	'WC'	31	66811	intergenic regions	LSC	P	31	66811	intergenic regions	LSC	-3	0.000166
31	'WC'	30	7751	intergenic regions	LSC	F	30	34227	intergenic regions	LSC	-3	0.000599
32	'WC'	30	8211	intergenic regions	LSC	P	30	82739	intergenic regions	LSC	-3	0.000599
33	'WC'	30	34227	intergenic regions	LSC	P	30	44331	intergenic regions	LSC	-3	0.000599
34	'WC'	30	50266	intergenic regions	LSC	F	30	50278	intergenic regions	LSC	-3	0.000599
35	'WC'	30	75664	intron regions	LSC	F	30	75665	intron regions	LSC	-3	0.000599
36	'WC'	30	82738	intergenic regions	LSC	F	30	82756	intergenic regions/protein coding regions	LSC	-3	0.000599
1	Dch 'X'	24808	82883	/	IRa	P	24808	124830	/	IRb	0	0
2	Dch 'X'	66	41203	intergenic regions	LSC	P	66	58508	intergenic regions/protein coding regions	LSC	-3	1.43e-24
3	Dch 'X'	55	51407	intergenic regions	LSC	P	55	51407	intergenic regions	LSC	-1	8.01e-22
4	Dch 'X'	50	66242	intergenic regions	LSC	P	50	66242	intergenic regions	LSC	0	4.97e-21
5	Dch 'X'	53	41241	intergenic regions	LSC	P	53	58483	intergenic regions/protein coding regions	LSC	-3	4.91e-17
6	Dch 'X'	40	28130	intergenic regions	LSC	P	40	28130	intergenic regions	LSC	0	5.21e-15
7	Dch 'X'	40	45716	intergenic regions	LSC	R	40	45716	intergenic regions	LSC	0	5.21e-15
8	Dch 'X'	39	95467	intergenic regions	IRa	F	39	117758	intron regions	SSC	0	2.08e-14
9	Dch 'X'	39	117758	intron regions	SSC	P	39	137015	intergenic regions	IRb	0	2.08e-14
10	Dch 'X'	44	41314	intergenic regions	LSC	P	44	58410	intergenic regions	LSC	-2	1.73e-13
11	Dch 'X'	45	66870	intergenic regions	LSC	P	45	66870	intergenic regions	LSC	-3	1.95e-12
12	Dch 'X'	36	6594	intergenic regions	LSC	R	36	6594	intergenic regions	LSC	-2	7.56e-09
13	Dch 'X'	33	45717	intergenic regions	LSC	P	33	45717	intergenic regions	LSC	-1	8.45e-09
14	Dch 'X'	33	45717	intergenic regions	LSC	C	33	45722	intergenic regions	LSC	-1	8.45e-09
15	Dch 'X'	33	45722	intergenic regions	LSC	P	33	45722	intergenic regions	LSC	-1	8.45e-09
16	Dch 'X'	37	84527	intergenic regions	IRa	F	37	84547	intergenic regions/protein coding regions	IRa	-3	6.99e-08
17	Dch 'X'	37	84527	intergenic regions	IRa	P	37	147937	protein coding regions/intergenic regions	IRb	-3	6.99e-08
18	Dch 'X'	37	84547	intergenic regions/protein coding regions	IRa	P	37	147957	intergenic regions	IRb	-3	6.99e-08
19	Dch 'X'	37	147937	protein coding regions/intergenic regions	IRb	F	37	147957	intergenic regions	IRb	-3	6.99e-08
20	Dch 'X'	33	31517	intergenic regions	LSC	F	33	31541	intergenic regions	LSC	-2	4.06e-07
21	Dch 'X'	30	30515	intergenic regions	LSC	R	30	30518	intergenic regions	LSC	-1	4.92e-07
22	Dch 'X'	35	0	intergenic regions	LSC	P	35	44433	intergenic regions	LSC	-3	9.43e-07
23	Dch 'X'	32	114978	intergenic regions	SSC	P	32	114982	intergenic regions	SSC	-2	1.52e-06
24	Dch 'X'	34	133	intergenic regions	LSC	P	34	45303	intergenic regions	LSC	-3	3.45e-06
25	Dch 'X'	33	111599	intergenic regions	SSC	F	33	111601	intergenic regions	SSC	-3	1.26e-05
26	Dch 'X'	30	37548	intron regions	LSC	F	30	39763	intron regions	LSC	-2	2.14e-05
27	Dch 'X'	30	45727	intergenic regions	LSC	P	30	45727	intergenic regions	LSC	-2	2.14e-05
28	Dch 'X'	30	80632	intron regions	LSC	R	30	80632	intron regions	LSC	-2	2.14e-05
29	Dch 'X'	32	9481	intergenic regions	LSC	F	32	35315	intergenic regions	LSC	-3	4.57e-05
30	Dch 'X'	31	45716	intergenic regions	LSC	C	31	45728	intergenic regions	LSC	-3	0.000166
31	Dch 'X'	30	8276	intergenic regions	LSC	P	30	111604	intergenic regions	SSC	-3	0.000599
32	Dch 'X'	30	34340	intergenic regions	LSC	P	30	44440	intergenic regions	LSC	-3	0.000599
33	Dch 'X'	30	41498	intergenic regions	LSC	P	30	46480	intergenic regions	LSC	-3	0.000599
34	Dch 'X'	30	45716	intergenic regions	LSC	F	30	45733	intergenic regions	LSC	-3	0.000599
35	Dch 'X'	30	45717	intergenic regions	LSC	F	30	45727	intergenic regions	LSC	-3	0.000599
36	Dch 'X'	30	66859	intergenic regions	LSC	R	30	75689	intron regions	LSC	-3	0.000599
1	F1 '87M'	24803	82436	/	IRa	P	24803	124389	/	IRb	0	0
2	F1 '87M'	87	40724	intergenic regions	LSC	P	87	57931	intergenic regions/protein coding regions	LSC	-3	7.48e-37
3	F1 '87M'	50	65685	intergenic regions	LSC	P	50	65685	intergenic regions	LSC	0	4.94e-21
4	F1 '87M'	49	40762	intergenic regions	LSC	P	49	57931	intergenic regions/protein coding regions	LSC	-1	2.9e-18
5	F1 '87M'	45	45228	intergenic regions	LSC	P	45	45228	intergenic regions	LSC	-1	6.83e-16
6	F1 '87M'	40	28239	intergenic regions	LSC	P	40	28239	intergenic regions	LSC	0	5.18e-15
7	F1 '87M'	40	45239	intergenic regions	LSC	P	40	45239	intergenic regions	LSC	0	5.18e-15
8	F1 '87M'	39	95020	intergenic regions	IRa	F	39	117318	intron regions	SSC	0	2.07e-14
9	F1 '87M'	39	117318	intron regions	SSC	P	39	136569	intergenic regions	IRb	0	2.07e-14
10	F1 '87M'	45	45229	intergenic regions	LSC	C	45	45234	intergenic regions	LSC	-2	4.51e-14
11	F1 '87M'	45	45234	intergenic regions	LSC	R	45	45234	intergenic regions	LSC	-2	4.51e-14
12	F1 '87M'	38	45229	intergenic regions	LSC	R	38	45229	intergenic regions	LSC	0	8.29e-14
13	F1 '87M'	44	40835	intergenic regions	LSC	P	44	57854	intergenic regions	LSC	-2	1.72e-13
14	F1 '87M'	36	44825	intergenic regions	LSC	F	36	44873	intergenic regions	LSC	-1	1.43e-10
15	F1 '87M'	31	67658	intergenic regions	LSC	F	31	67679	intergenic regions	LSC	0	1.36e-09
16	F1 '87M'	34	45228	intergenic regions	LSC	F	34	45245	intergenic regions	LSC	-1	2.16e-09
17	F1 '87M'	39	45228	intergenic regions	LSC	C	39	45240	intergenic regions	LSC	-3	5.11e-09
18	F1 '87M'	39	45228	intergenic regions	LSC	P	39	45241	intergenic regions	LSC	-3	5.11e-09
19	F1 '87M'	30	7860	intergenic regions	LSC	P	30	43962	intergenic regions	LSC	0	5.43e-09
20	F1 '87M'	33	45229	intergenic regions	LSC	P	33	45229	intergenic regions	LSC	-1	8.4e-09
21	F1 '87M'	38	45229	intergenic regions	LSC	F	38	45239	intergenic regions	LSC	-3	1.89e-08
22	F1 '87M'	35	45244	intergenic regions	LSC	R	35	45244	intergenic regions	LSC	-2	2.84e-08
23	F1 '87M'	37	45244	intergenic regions	LSC	P	37	45244	intergenic regions	LSC	-3	6.95e-08
24	F1 '87M'	37	84080	intergenic regions	IRa	F	37	84100	intergenic regions/protein coding regions	IRa	-3	6.95e-08
25	F1 '87M'	37	84080	intergenic regions	IRa	P	37	147491	protein coding regions/intergenic regions	IRb	-3	6.95e-08
26	F1 '87M'	37	84100	intergenic regions/protein coding regions	IRa	P	37	147511	intergenic regions	IRb	-3	6.95e-08
27	F1 '87M'	37	147491	protein coding regions/intergenic regions	IRb	F	37	147511	intergenic regions	IRb	-3	6.95e-08
28	F1 '87M'	30	45229	intergenic regions	LSC	C	30	45251	intergenic regions	LSC	-1	4.89e-07
29	F1 '87M'	35	45239	intergenic regions	LSC	F	35	45246	intergenic regions	LSC	-3	9.37e-07
30	F1 '87M'	34	7995	intergenic regions	LSC	P	34	44832	intergenic regions	LSC	-3	3.43e-06
31	F1 '87M'	34	45246	intergenic regions	LSC	C	34	45251	intergenic regions	LSC	-3	3.43e-06
32	F1 '87M'	34	111181	intergenic regions	SSC	F	34	111183	intergenic regions	SSC	-3	3.43e-06
33	F1 '87M'	33	45239	intergenic regions	LSC	P	33	45239	intergenic regions	LSC	-3	1.25e-05
34	F1 '87M'	30	80182	intron regions	LSC	R	30	80182	intron regions	LSC	-2	2.13e-05
35	F1 '87M'	30	111044	intergenic regions	SSC	F	30	111067	intergenic regions	SSC	-2	2.13e-05
36	F1 '87M'	32	9601	intergenic regions	LSC	F	32	35343	intergenic regions	LSC	-3	4.54e-05
37	F1 '87M'	31	138	intergenic regions	LSC	C	31	7698	intergenic regions	LSC	-3	0.000165
38	F1 '87M'	31	7998	intergenic regions	LSC	P	31	44880	intergenic regions	LSC	-3	0.000165
39	F1 '87M'	31	66316	intergenic regions	LSC	C	31	66768	protein coding regions/intergenic regions	LSC	-3	0.000165
40	F1 '87M'	30	231	intergenic regions	LSC	F	30	331	intergenic regions	LSC	-3	0.000595
41	F1 '87M'	30	7860	intergenic regions	LSC	F	30	34379	intergenic regions	LSC	-3	0.000595
42	F1 '87M'	30	34379	intergenic regions	LSC	P	30	43962	intergenic regions	LSC	-3	0.000595
43	F1 '87M'	30	41019	intergenic regions	LSC	P	30	45973	intergenic regions	LSC	-3	0.000595
F represent Forward; R represent Reverse; C represent Complement; P represent Palindromic.

## Sheet: Table S10
Table S10. The Ks of all 76 protein coding genes in Dianthus species.
Name of genes	Group of genes	Ks	Region
ycf1	Conserved open reading frames	0.0146	IR/SSC
ycf4	Conserved open reading frames	0.0112	LSC
ycf2	Conserved open reading frames	0.0014	IR1
ycf3	Conserved open reading frames	0	LSC
rpoC1	DNA dependent RNA polymerase	0.0088	LSC
rpoB	DNA dependent RNA polymerase	0.0079	LSC
rpoA	DNA dependent RNA polymerase	0.0067	LSC
rpoC2	DNA dependent RNA polymerase	0.0021	LSC
cemA	Envelop membrane protein	0.0044	LSC
rpl20	Large subunit of ribosome	0.0471	LSC
rpl32	Large subunit of ribosome	0.0273	SSC
rpl2	Large subunit of ribosome	0.0168	LSC
rpl16	Large subunit of ribosome	0.0113	LSC
rpl14	Large subunit of ribosome	0.0002	LSC
rpl22	Large subunit of ribosome	0	IR1
rpl33	Large subunit of ribosome	0	LSC
rpl36	Large subunit of ribosome	0	LSC
matK	Maturase	0.0047	LSC
clpP	Protease	0	LSC
rps4	Small subunit of ribosome	0.0409	LSC
rps18	Small subunit of ribosome	0.0278	LSC
rps8	Small subunit of ribosome	0.013	LSC
rps3	Small subunit of ribosome	0.0091	LSC
rps19	Small subunit of ribosome	0.0002	IR/LSC
rps7	Small subunit of ribosome	0.0001	IR1
rps11	Small subunit of ribosome	0	LSC
rps12	Small subunit of ribosome	0	LSC/IR
rps14	Small subunit of ribosome	0	LSC
rps15	Small subunit of ribosome	0	SSC
rps16	Small subunit of ribosome	0	LSC
rps2	Small subunit of ribosome	0	LSC
accD	Subunit of Acetyl-CoA-carboxylase	0.0226	LSC
atpE	Subunits of ATP synthase	0.0233	LSC
atpI	Subunits of ATP synthase	0.0189	LSC
atpB	Subunits of ATP synthase	0.0065	LSC
atpH	Subunits of ATP synthase	0.0001	LSC
atpA	Subunits of ATP synthase	0	LSC
atpF	Subunits of ATP synthase	0	LSC
petD	Subunits of cytochrome b/f complex	0.0181	LSC
petB	Subunits of cytochrome b/f complex	0.0124	LSC
petG	Subunits of cytochrome b/f complex	0.0001	LSC
petN	Subunits of cytochrome b/f complex	0.0001	LSC
petA	Subunits of cytochrome b/f complex	0	LSC
petL	Subunits of cytochrome b/f complex	0	LSC
ndhA	Subunits of NADH-dehydrogenase	0.0279	SSC
ndhC	Subunits of NADH-dehydrogenase	0.0187	LSC
ndhI	Subunits of NADH-dehydrogenase	0.0175	SSC
ndhK	Subunits of NADH-dehydrogenase	0.0162	LSC
ndhF	Subunits of NADH-dehydrogenase	0.0101	SSC/IR
ndhH	Subunits of NADH-dehydrogenase	0.0066	SSC
ndhD	Subunits of NADH-dehydrogenase	0.0042	SSC
ndhE	Subunits of NADH-dehydrogenase	0.0002	SSC
ndhJ	Subunits of NADH-dehydrogenase	0.0002	LSC
ndhB	Subunits of NADH-dehydrogenase	0	LSC
ndhG	Subunits of NADH-dehydrogenase	0	SSC
psaC	Subunits of photosystem I	0.0002	SSC
psaI	Subunits of photosystem I	0.0002	LSC
psaJ	Subunits of photosystem I	0.0002	LSC
psaB	Subunits of photosystem I	0.0052	LSC
psbE	Subunits of photosystem II	0.0002	LSC
psbH	Subunits of photosystem II	0.0002	LSC
psbT	Subunits of photosystem II	0.0002	LSC
psbZ	Subunits of photosystem II	0.0002	LSC
psbF	Subunits of photosystem II	0.0001	LSC
psbI	Subunits of photosystem II	0.0001	LSC
psbM	Subunits of photosystem II	0.0001	LSC
psbJ	Subunits of photosystem II	0	LSC
psbN	Subunits of photosystem II	0	LSC
psbK	Subunits of photosystem II	0.0003	LSC
psbL	Subunits of photosystem II	0.0003	LSC
psbC	Subunits of photosystem II	0.0046	LSC
psbD	Subunits of photosystem II	0.0094	LSC
psbB	Subunits of photosystem II	0.0093	LSC
psbA	Subunits of photosystem II	0.023	LSC
rbcL	Subunits of rubisco	0.0033	LSC
infA	Translational initiation factor	0	LSC
